# Supplementary material for: Integration of copy number and transcriptomics provides risk stratification in prostate cancer: A discovery and validation cohort study
Source: PubMed Central journal article supplement (PMC4588396; doi:10.1016/j.ebiom.2015.07.017), 2015-07-29
Supplement: mmc1.pdf [file mmc1.pdf]

**Integration of copy number and transcriptomics provides risk stratification in prostate cancer:  
a discovery and validation cohort study**

H Ross-Adams<sup>1\*</sup>, AD Lamb<sup>1,2,3\*</sup>, MJ Dunning<sup>1\*</sup>, S Halim<sup>1</sup>, J Lindberg<sup>4</sup>, CM Massie<sup>1</sup>, LA Egevad<sup>5</sup>, R Russell<sup>1</sup>, A Ramos-Montoya<sup>1</sup>, SL Vowler<sup>1</sup>, NL Sharma<sup>6</sup>, J Kay<sup>1,7</sup>, H Whitaker<sup>1,7</sup>, J Clark<sup>8</sup>, R Hurst<sup>8</sup>, VJ Gnanapragasam<sup>2,3</sup>, NC Shah<sup>2</sup>, AY Warren<sup>9</sup>, CS Cooper<sup>8</sup>, AG Lynch<sup>1</sup>, R Stark<sup>1</sup>, IG Mills<sup>1,10,11,12</sup>, H Grönberg<sup>4†</sup>, DE Neal<sup>1,2†</sup> on behalf of the CamCaP Study Group<sup>‡</sup>

† \* These authors contributed equally to this work.

‡ List of participants and affiliations appears at the end of the paper

<sup>1</sup> Cancer Research UK Cambridge Institute, University of Cambridge, Cambridge, CB2 0RE, UK

<sup>2</sup> Department of Urology, Addenbrooke's Hospital, Cambridge, CB2 2QQ, UK

<sup>3</sup> Academic Urology Group, University of Cambridge, Cambridge, CB2 0QQ, UK

<sup>4</sup> Department of Medical Epidemiology and Biostatistics, Karolinska Institutet, Stockholm, Sweden

<sup>5</sup> Department of Oncology-Pathology, Karolinska Institutet, Stockholm, Sweden

<sup>6</sup> Nuffield Department of Surgical Sciences, University of Oxford, Roosevelt Drive, Oxford, UK

<sup>7</sup> Current address: Molecular Diagnostics and Therapeutics Group, University College London, W1W 7EJ

<sup>8</sup> University of East Anglia, Norwich Research Park, Norwich, NR4 7TJ, UK

<sup>9</sup> Department of Pathology, Addenbrooke's Hospital, Cambridge, CB2 2QQ, UK

<sup>10</sup> Prostate Cancer Research Group, Centre for Molecular Medicine Norway, Nordic EMBL Partnership, University of Oslo and Oslo University Hospital, N-0318 Oslo

<sup>11</sup> Department of Molecular Oncology, Institute of Cancer Research, Oslo University Hospitals, N-0424 Oslo, Norway

<sup>12</sup> Movember Centre of Excellence for Prostate Cancer Research, Centre for Cancer Research and Cell Biology, Queen's University, Belfast, UK

Supplementary Figure 1-18

Supplementary Methods

Supplementary Case Example

Supplementary Tables 1,3-12 (Supplementary Table 2 is a separate file)

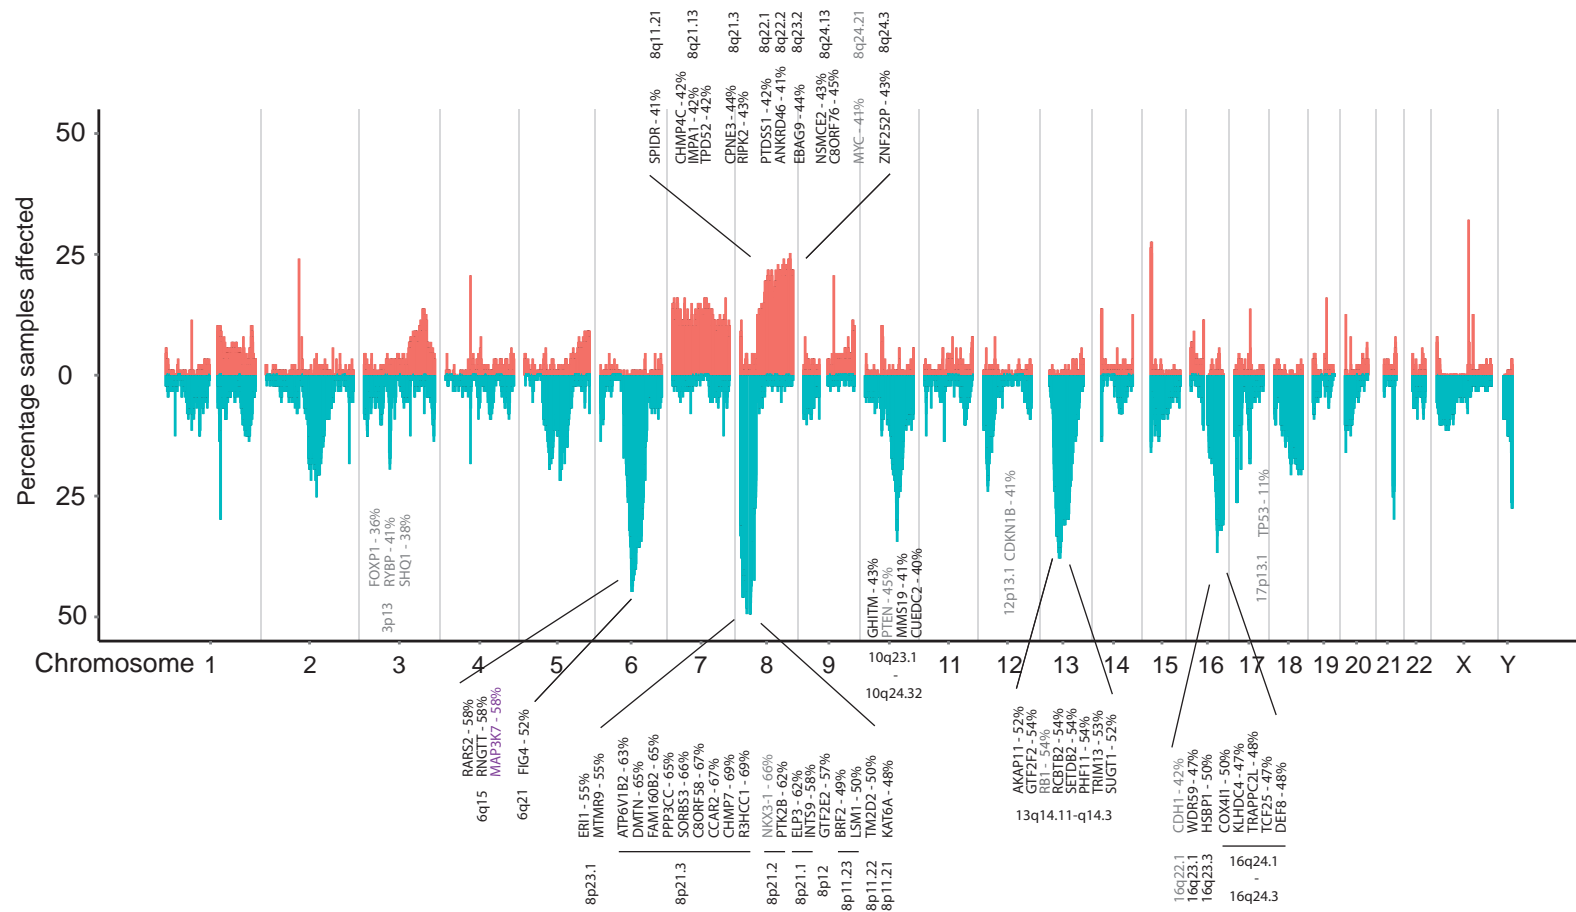

**Supplementary Figure 1. A genome-wide copy number profile of the Stockholm validation cohort.**

The percentage of samples containing copy number aberrations (CNA) at each locus is shown by gain/loss (red/blue); left hand y-axis. Established prostate cancer risk genes commonly disrupted by CNAs (from Williams et al. (2014) meta-analysis) are indicated in grey (gene name and frequency altered in this cohort are shown, see also Suppl. Table 3); only those affected in >10% samples are annotated. Novel CN changes identified in this cohort (>10% samples) also relevant in our 100-gene set are indicated in black type. The same general patterns of gains/losses identified in the discovery cohort are seen in this dataset, which was assayed on lower-density Affymetrix SNP6 arrays and analysed using ASCAT (van Loo et al., 2010) (see Methods), with no filtering of results. Chromosome ends are delineated by grey, vertical stripes. No gene expression data are available for this cohort, as no matched normal tissues were available.

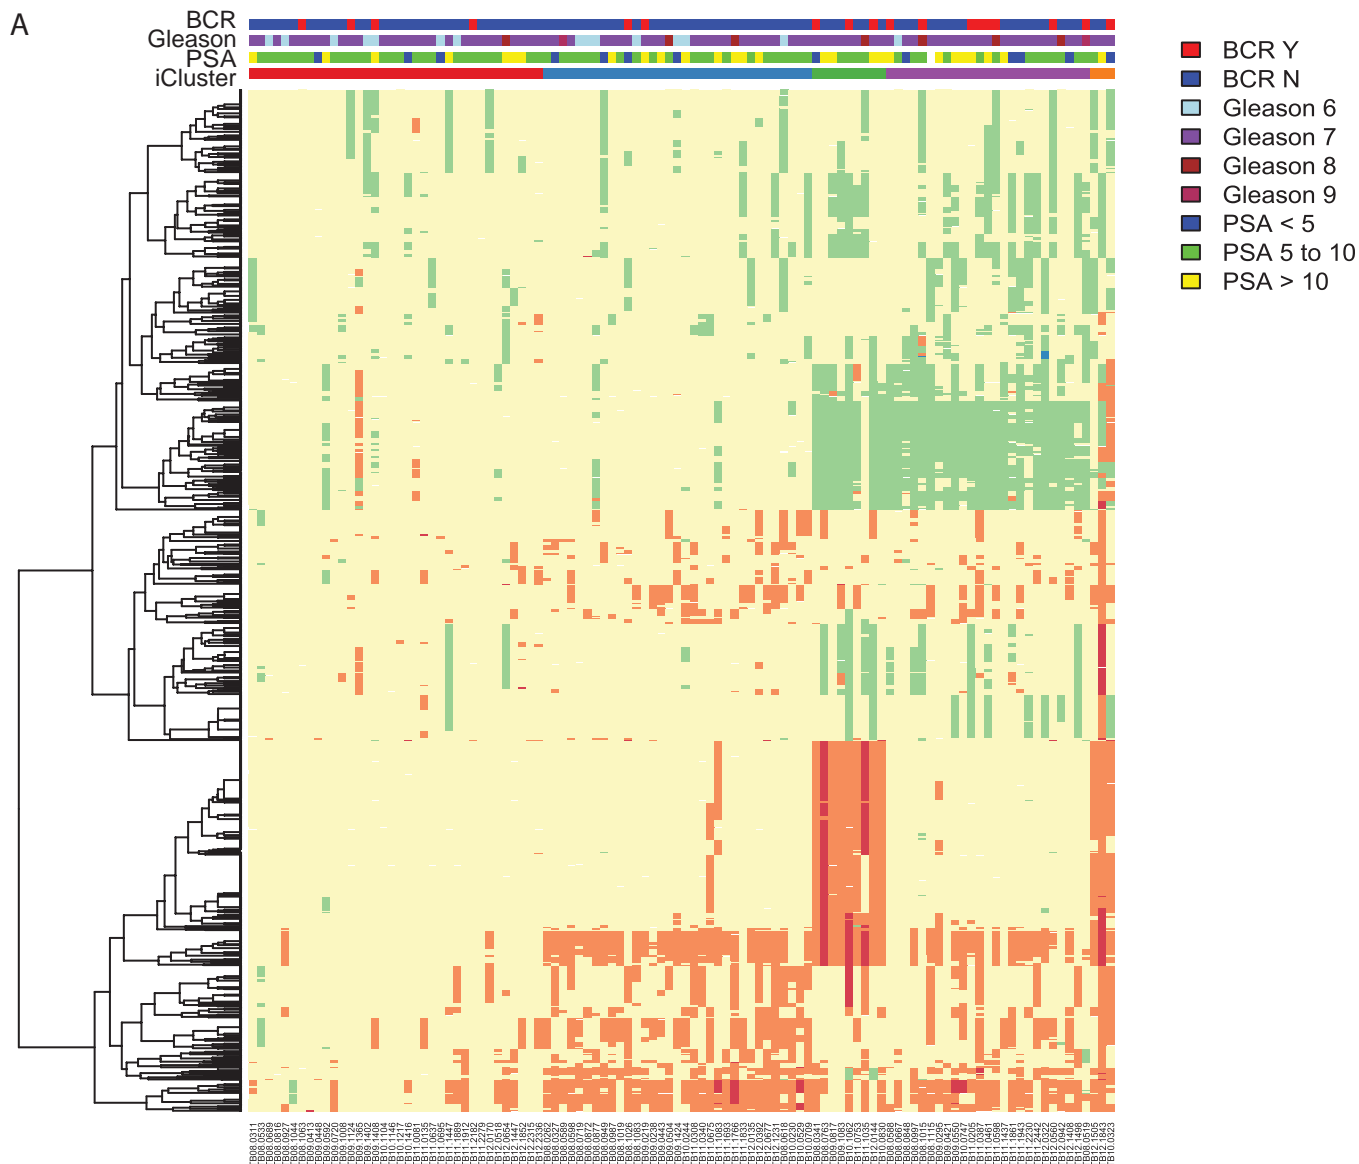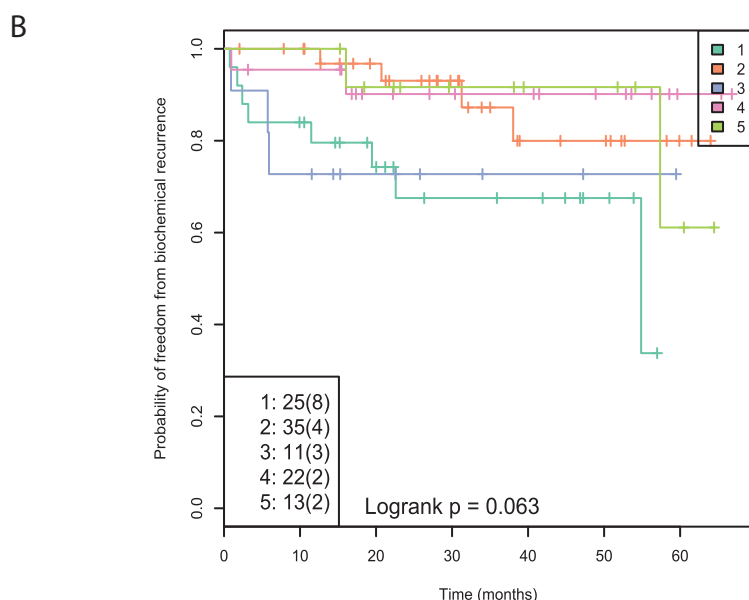

**Supplementary Figure 2. Clustering based on CN alone.**

**A.** Genome-wide profiles identify five groups of patients with distinct CN profiles (see Methods). Gains are shown in pink (heterozygous; +1) and red (homozygous; +2), losses are indicated in green (heterozygous; -1) and blue (homozygous; -2). The distribution of clinical characteristics is shown. PSA = pre-operative PSA (ng/ml). Gleason = Prostatectomy Gleason Score. BCR = biochemical relapse.

**B.** Kaplan-Meier biochemical relapse curves using clusters generated above. These CN profiles are not prognostic (logrank  $p=0.063$ ). Copy number data were analysed in OncoSNP (Yau et al., 2010); all rank calls were used to identify patient clusters to increase signal and ensure even small CNAs were captured (ranks3/4/5) and not just larger copy number alterations (ranks1/2).

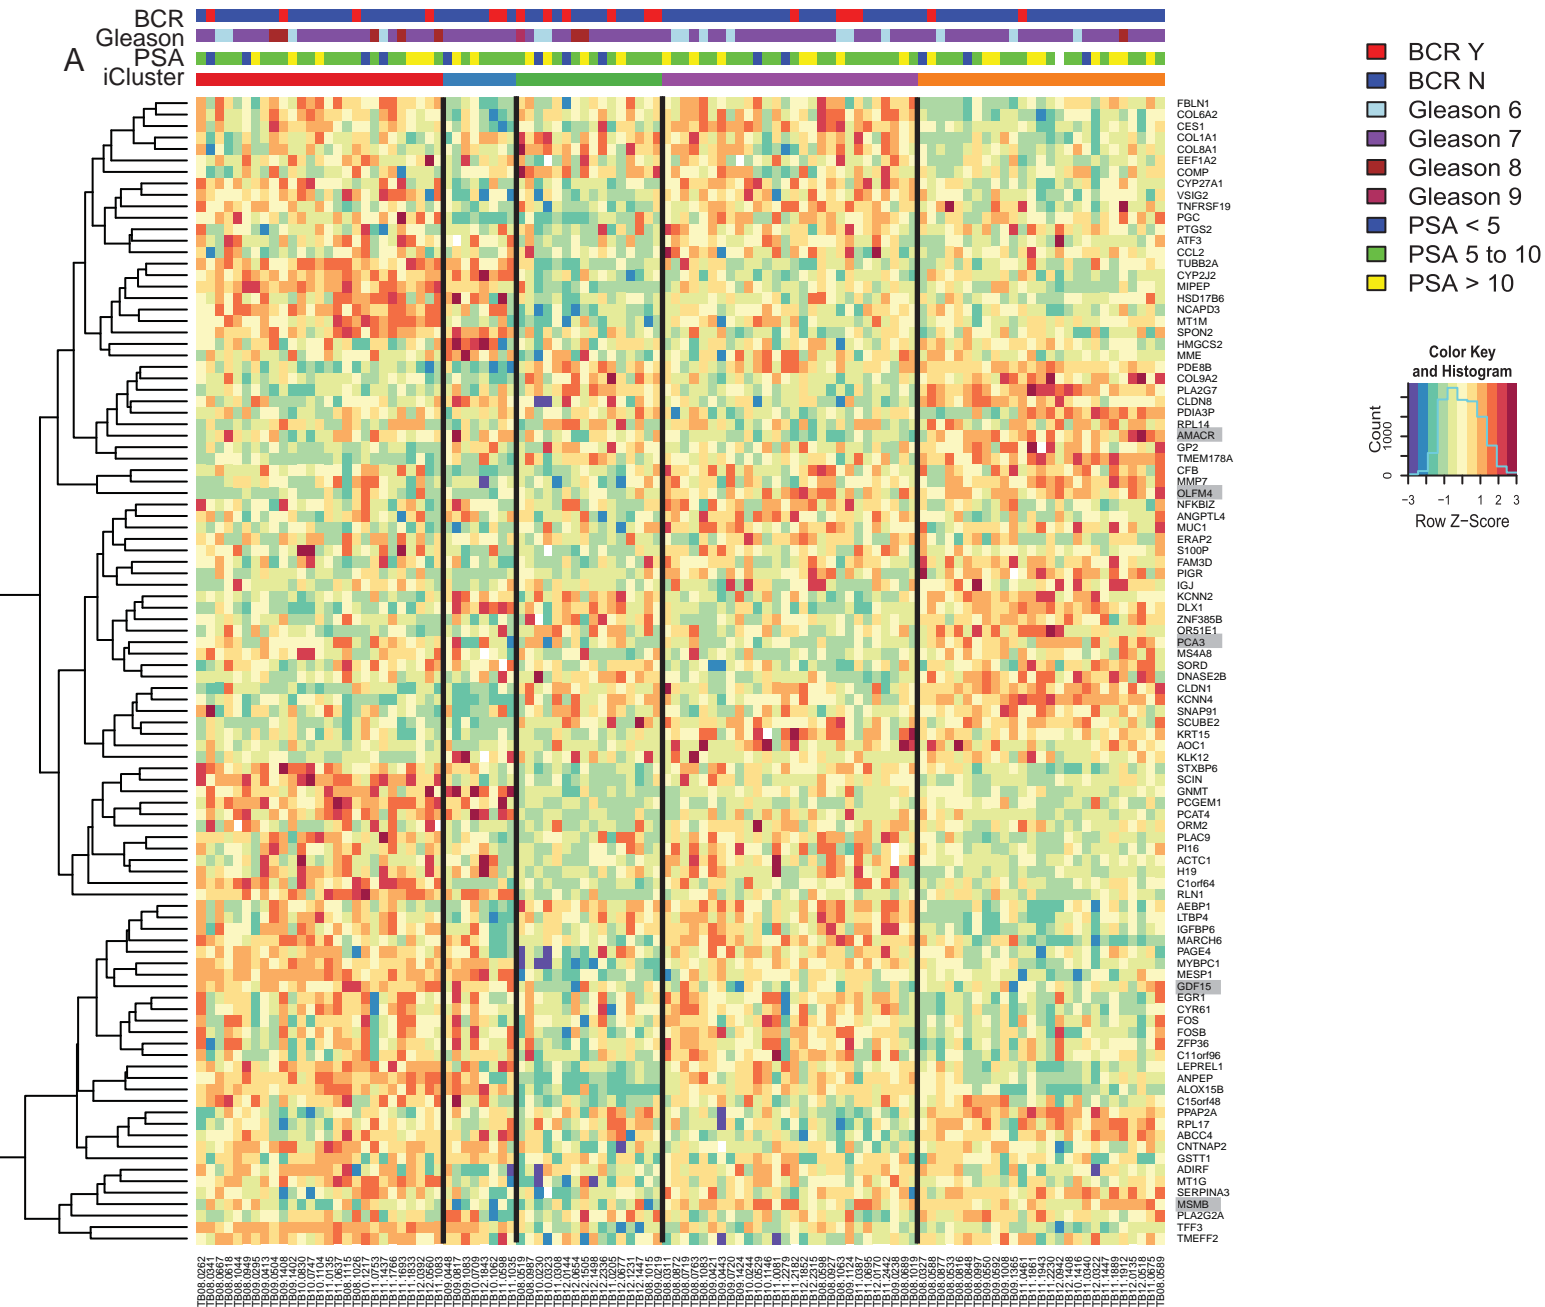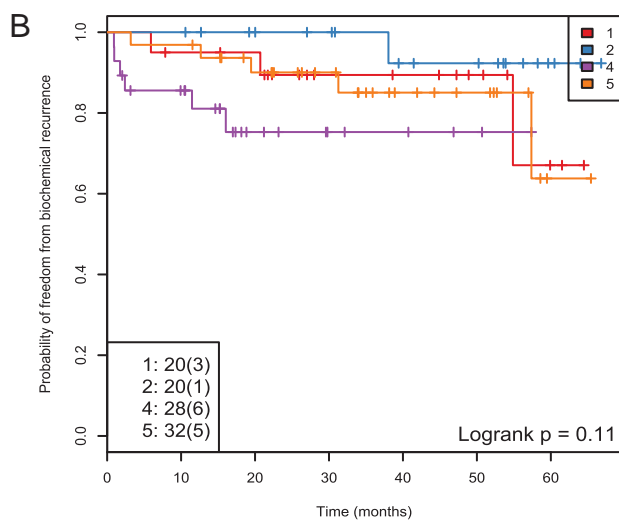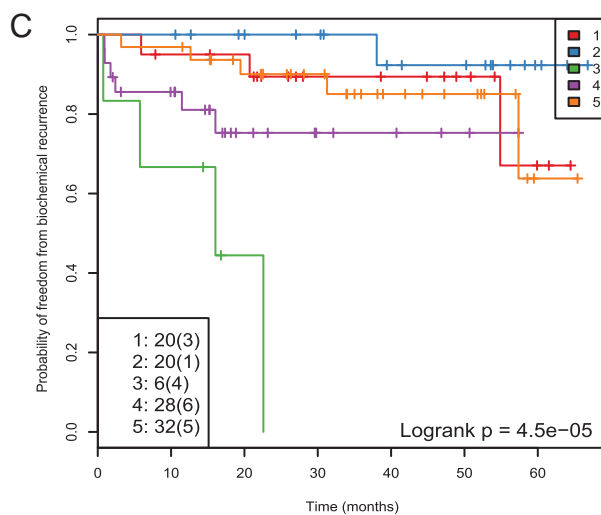

### Supplementary Figure 3. Clustering based on Gene Expression (GEX) alone.

**A.** k-means clustering of the top 100 most variable inter-tumour probes (Gorlov et al., 2014) identified 5 clusters based on Illumina HT12 mRNA transcript data from primary prostate cancer tissue samples (see Methods). The distribution of clinical characteristics is shown. Relative expression of the 100 most variable genes (between tumours) are shown. This approach identified known prostate cancer risk genes AMACR, PCA3, GDF15, OLFM4 and MSMB, highlighted in grey. PSA = pre-operative PSA (ng/ml). Gleason = Prostatectomy Gleason Score. BCR = biochemical relapse.

**B.** Kaplan-Meier biochemical relapse curves using clusters generated above. These GEX profiles alone are not prognostic (logrank  $p=0.11$ ).

**C.** Transcript-only profiling was only statistically significant when a small group of outliers was included in the analysis.

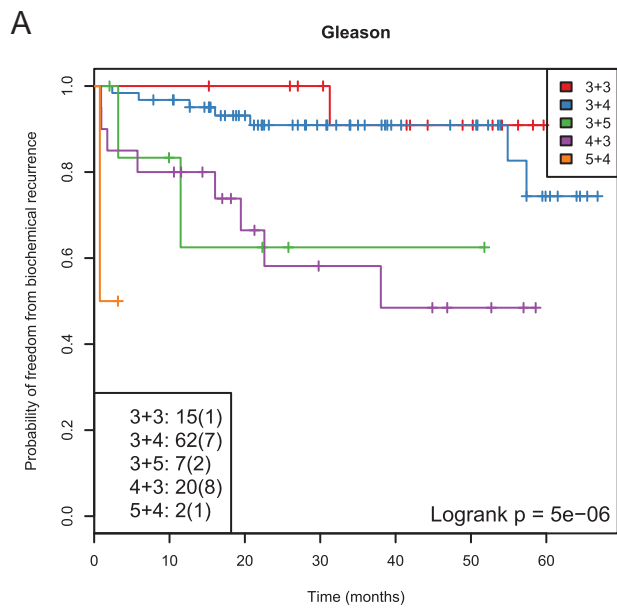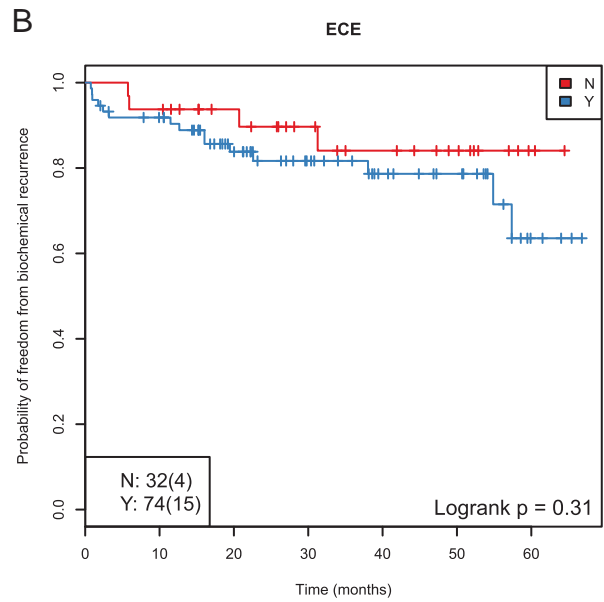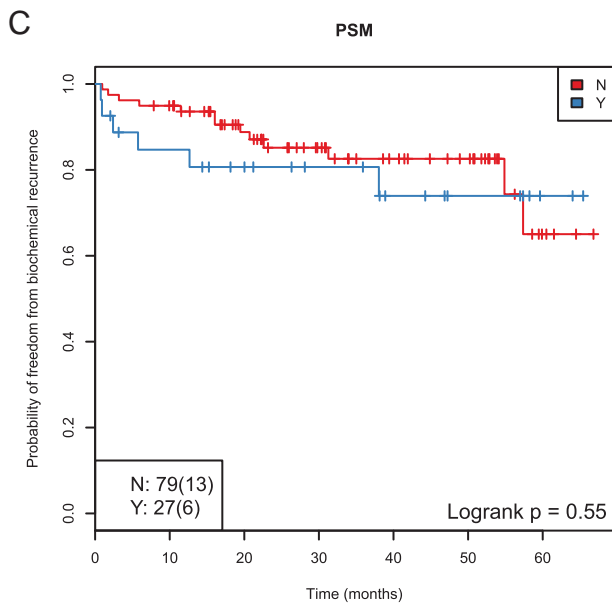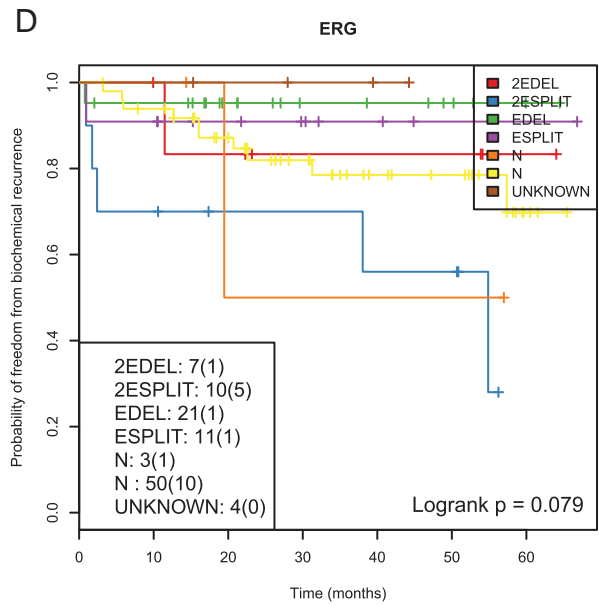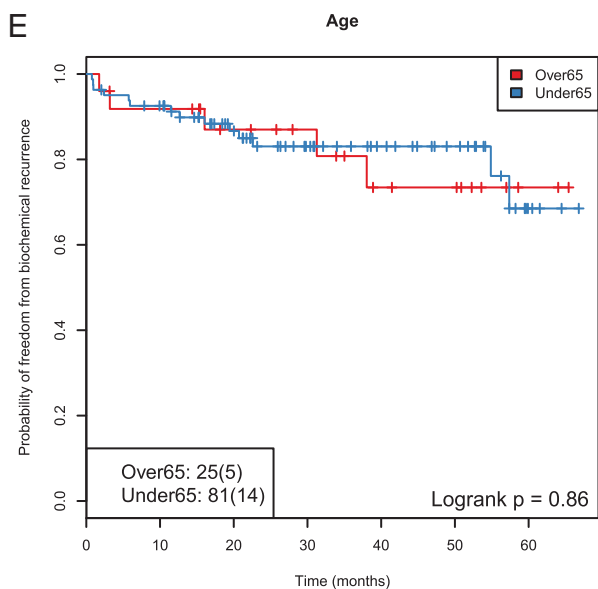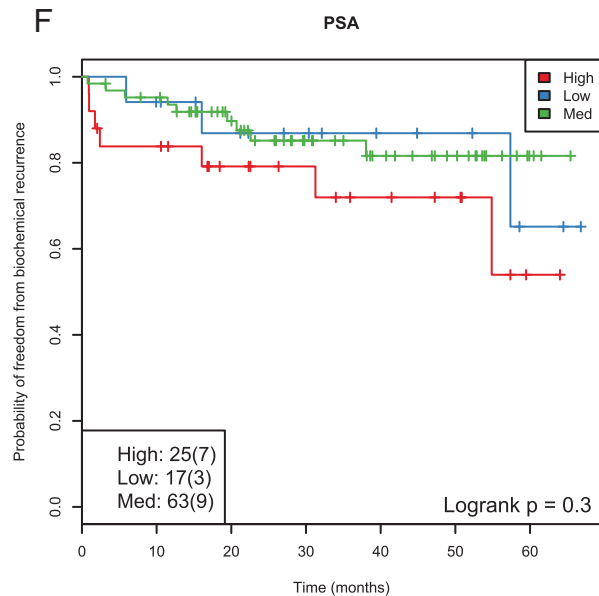

**Supplementary Figure 4. Relapse-free survival curves based on clinical characteristics.**

- A.** Kaplan-Meier biochemical relapse curves split by Gleason score in the Discovery Cohort.  
**B.** Extracapsular extension (ECE).  
**C.** Positive surgical margin (PSM).  
**D.** TMPRSS2-ERG gene fusion status (ERG).  
**E.** Age.  
**F.** Pre-operative PSA (low < 3 ng/ml; medium 3-10 ng/ml; high > 10 ng/ml).

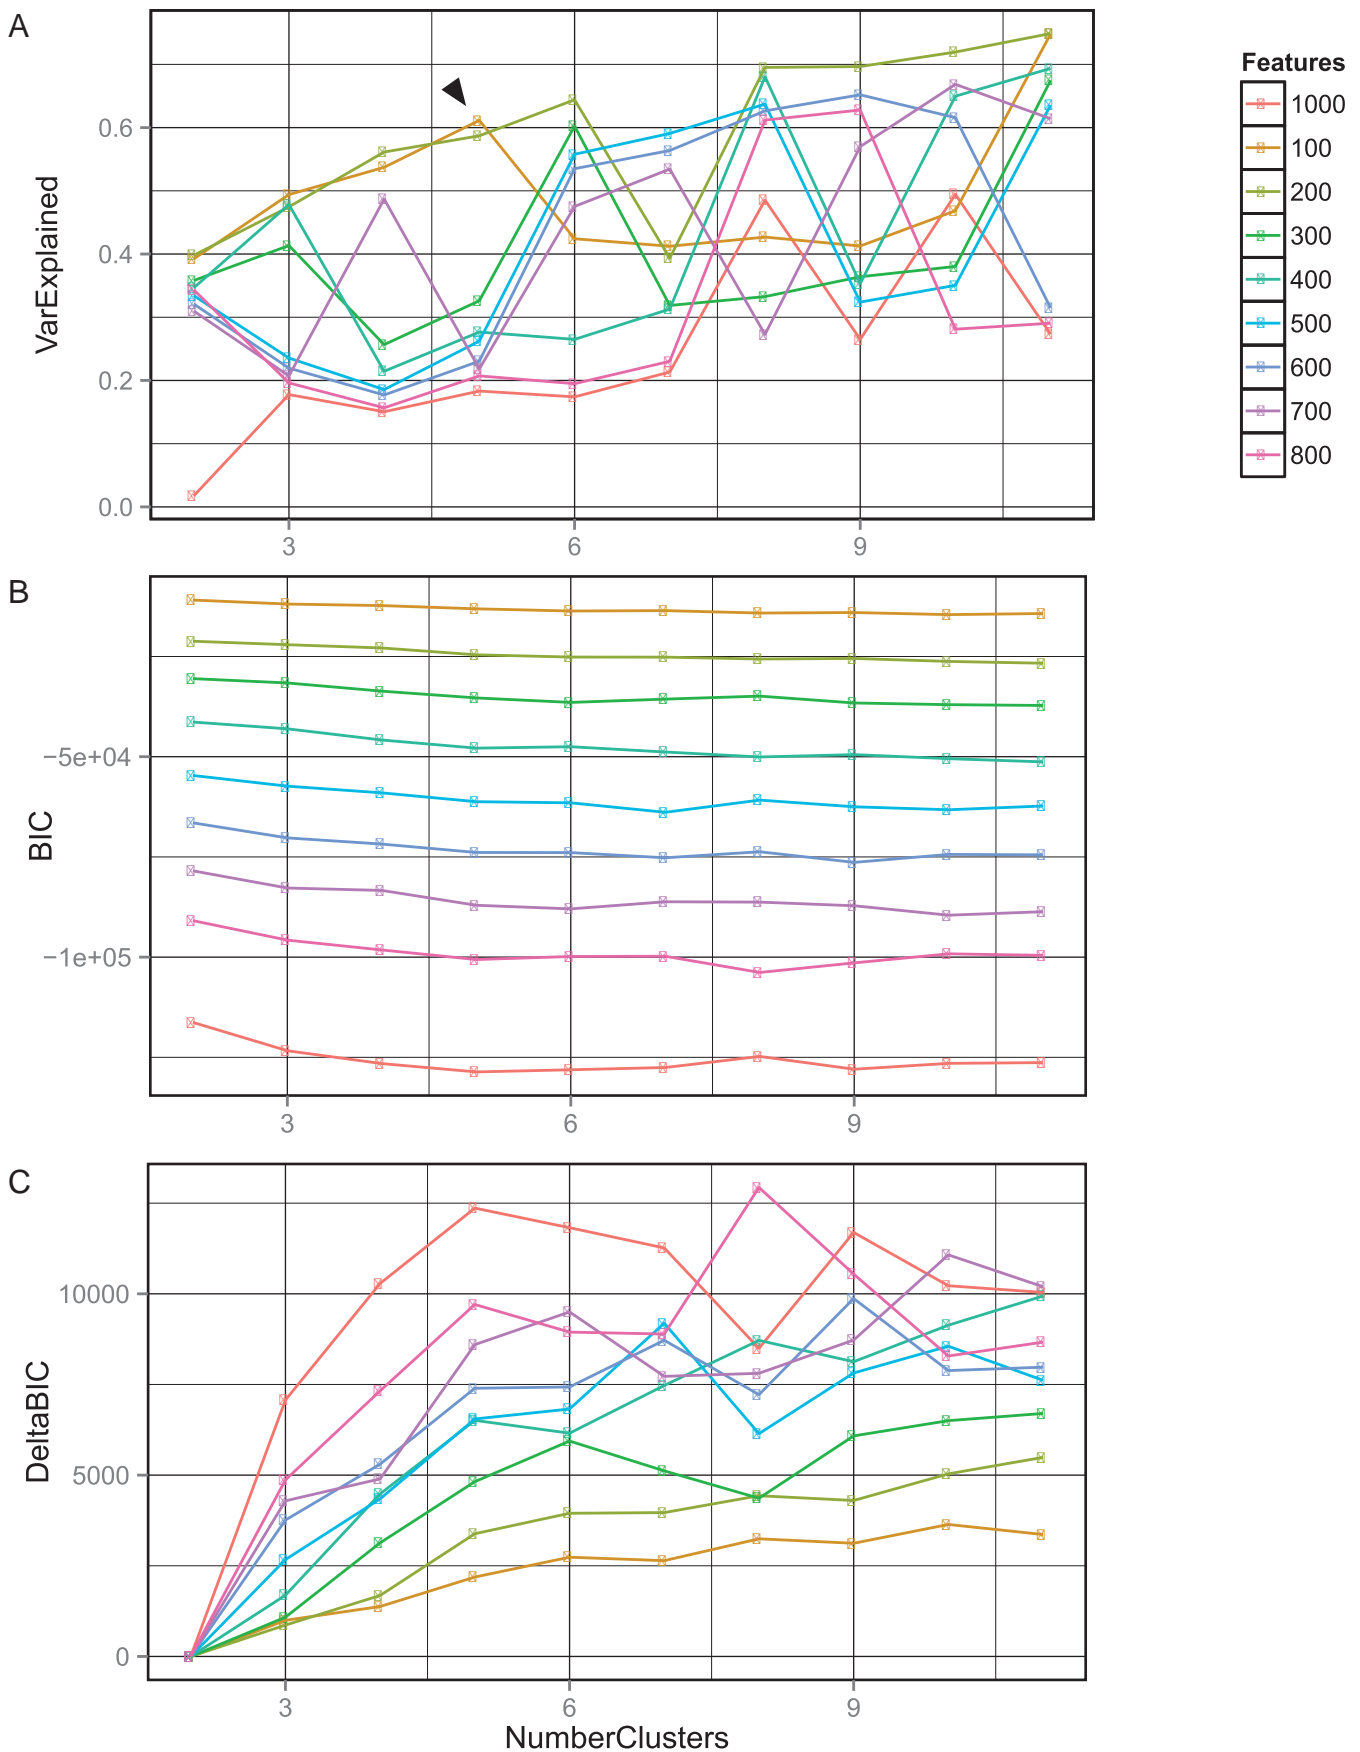

**Supplementary Figure 5. Selection of integrated clusters in the Cambridge Discovery Cohort.**

**A.** Variance plotted against number of clusters for 10 increasing size feature sets. The smallest number of features ( $n=100$ ) consistently described the most variance for lower numbers of clusters. The inflection point at  $n=5$  clusters was chosen as describing the most variance with largest numbers of men per cluster ( $k+1$ ;  $iCluster+ k=4$ ; see Methods & Supplementary Methods).

**B.** Optimal number of features was selected to minimize Bayesian information criterion (BIC) for a given  $k$ .

**C.** One over BIC was plotted (Delta BIC) to better display incremental differences in BIC. Clear inflection is seen in this figure at 5 clusters.

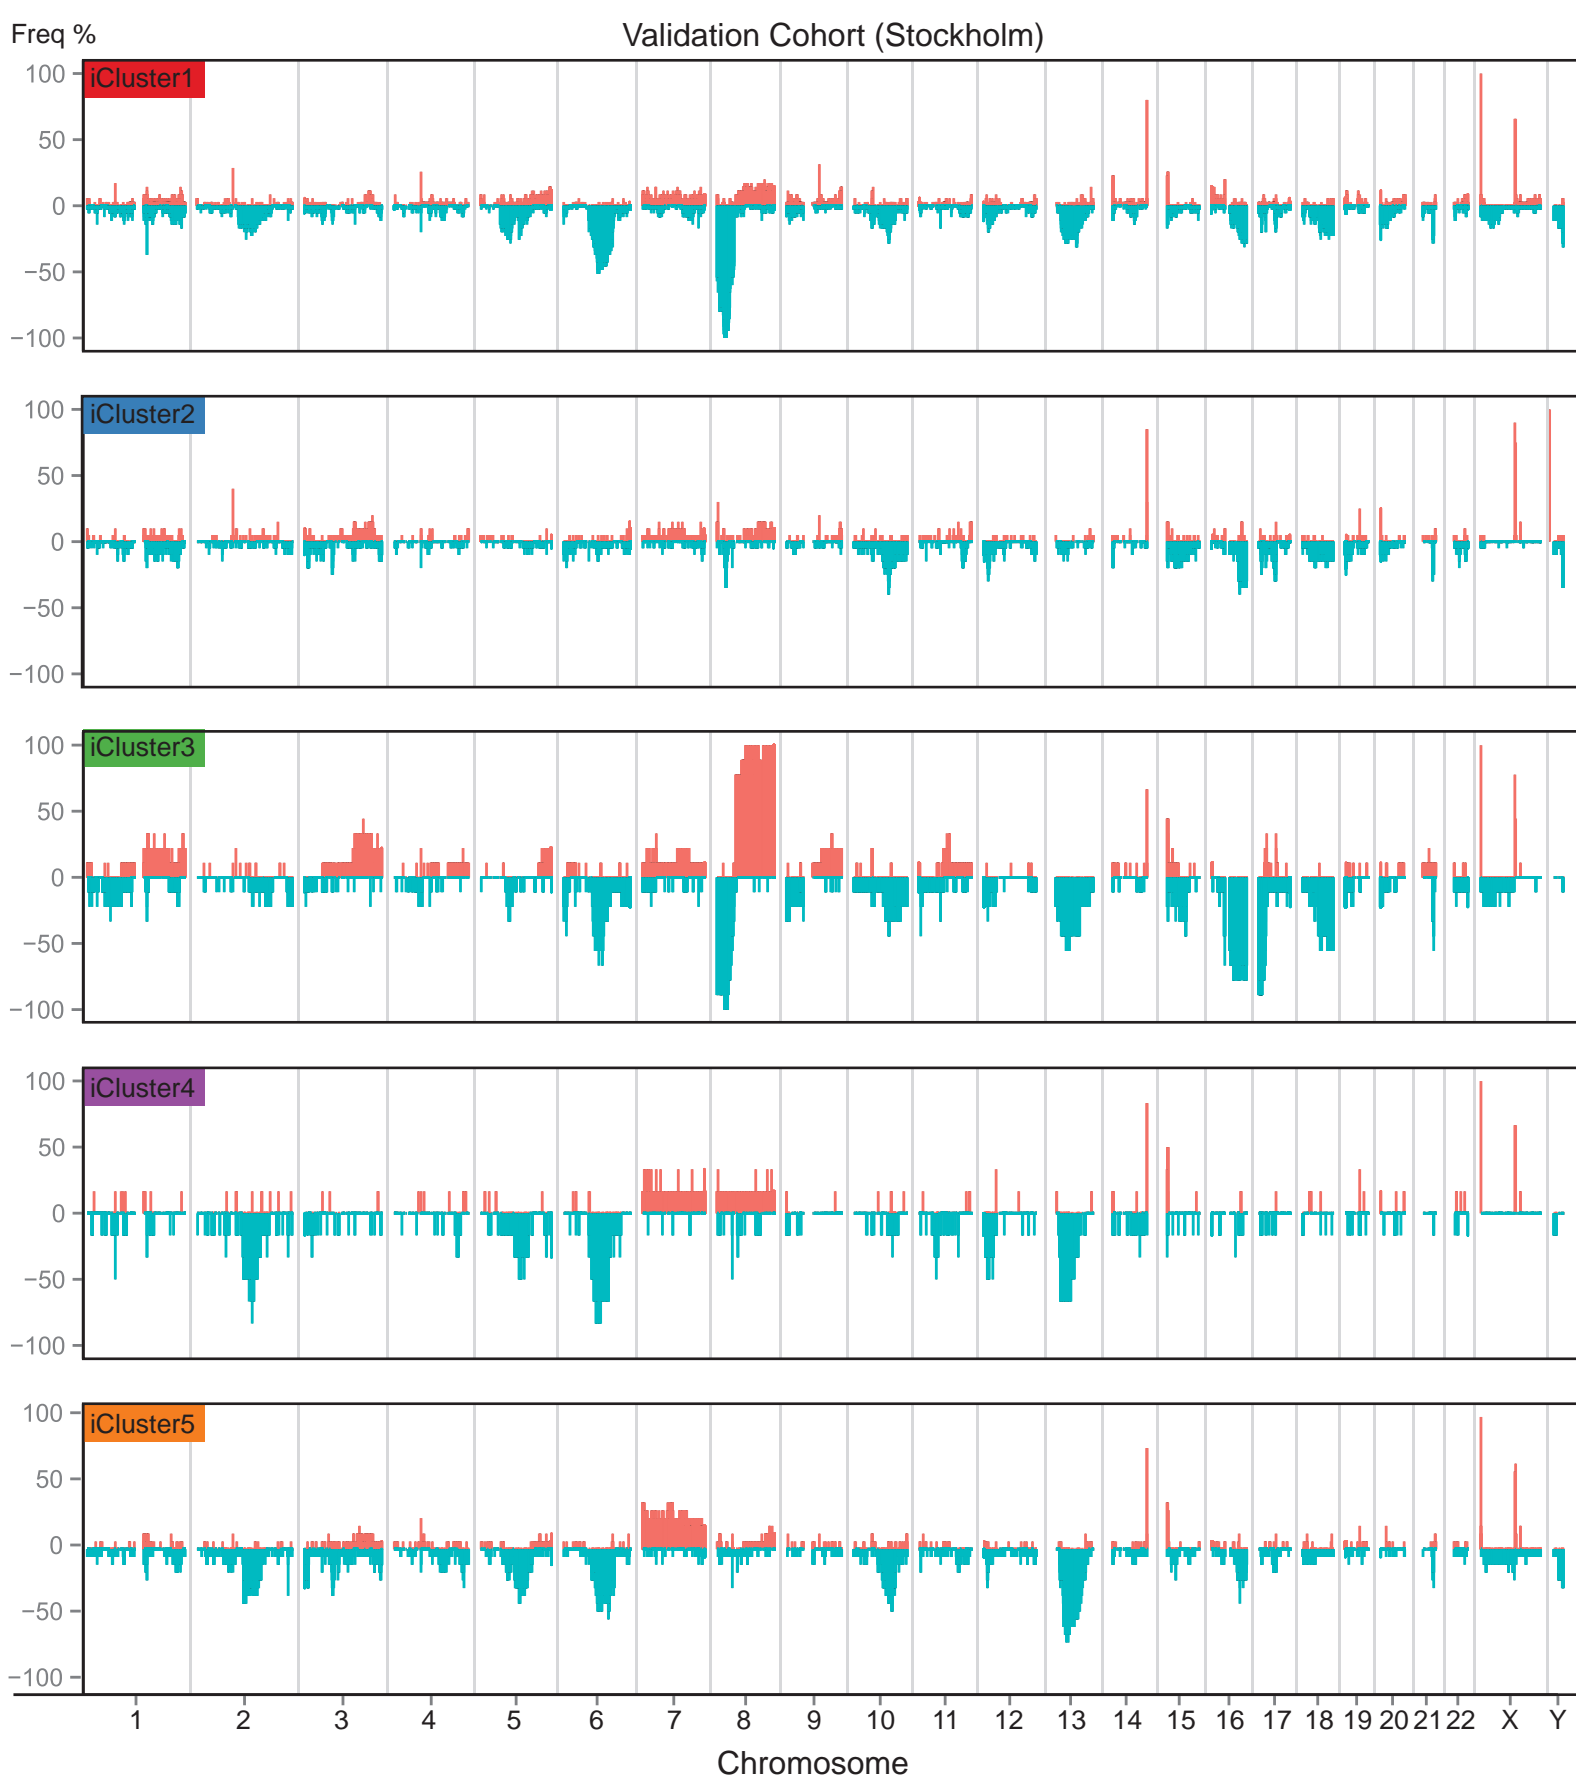

### Supplementary Figure 6. Validation of integrative clusters (Stockholm Validation Cohort)

Genome-wide frequencies of somatic copy number alterations (CNAs) presented as a percentage of samples (left y-axis) in each Integrated Cluster (iCluster). Regions of copy number gain are indicated in red and regions of loss in blue. Subgroups were identified by integrated hierarchical clustering (as described in methods) of the discovery cohort (Figure 2;  $n=125$ ; Illumina Omni2.5 array). For the validation cohort ( $n=99$ ; Affymetrix SNP6 array) men were allocated to these same clusters based on the 100 CN and GEx features analysed using PAMr (Tibshirani et al., 2003; see Methods). Integrative clusters 1-5 correspond with survival analysis curves in Figure 3B.

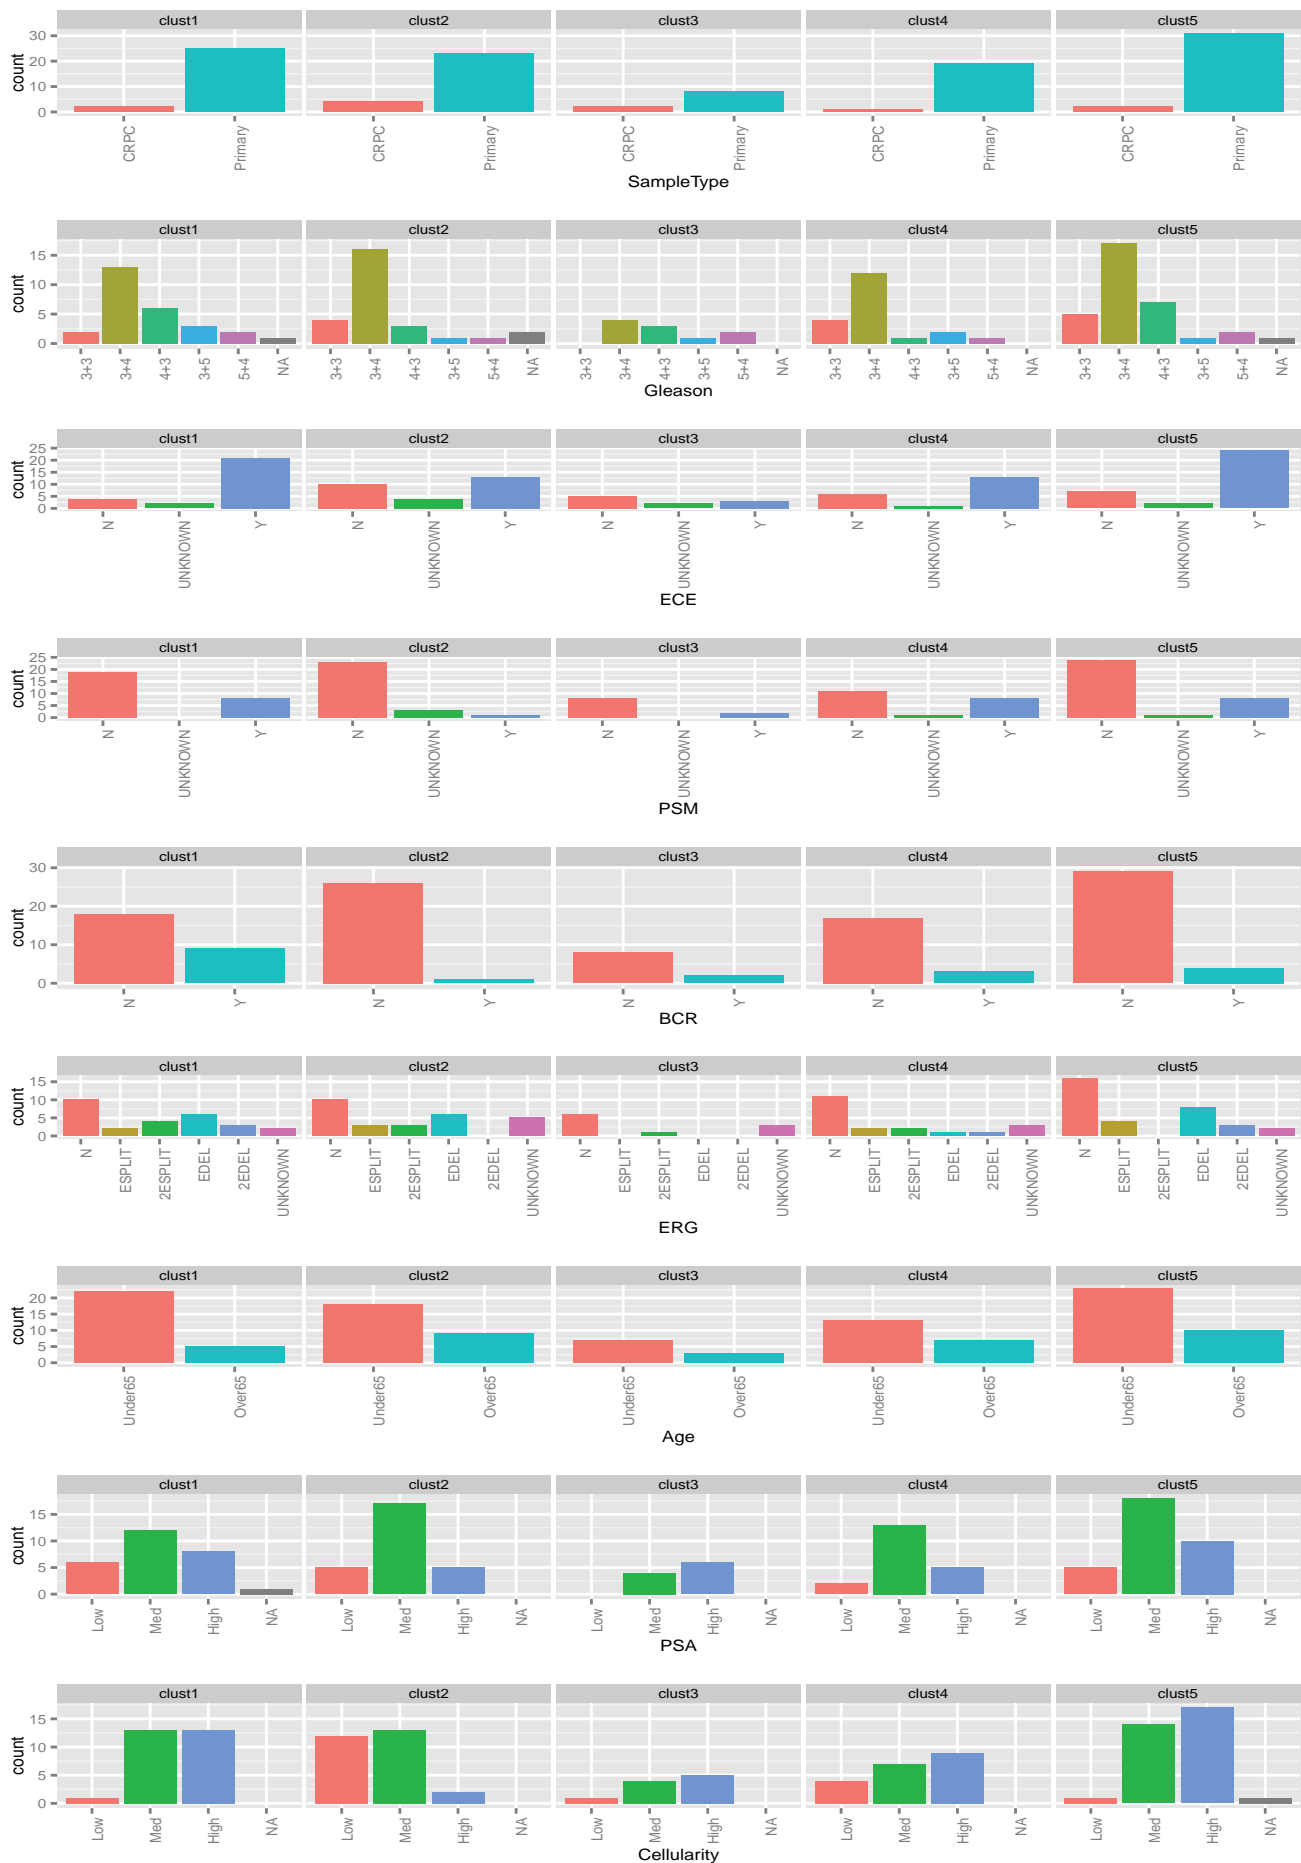

**Supplementary Figure 7. Clinical Features of the integrative clusters (Cambridge Discovery Cohort).** Distribution of samples between each sub-group is shown. CRPC samples are also included in the distribution (though not used in defining the clusters). Additional clinical information includes the presence of extra-capsular extension (ECE), positive surgical margin (PSM), biochemical relapse (BCR), TMPRSS2:ERG fusion status (ERG), age, PSA (low = <3ng/ml, med = 3-10ng/ml, high = >10ng/ml) and cellularity of the sample analysed.



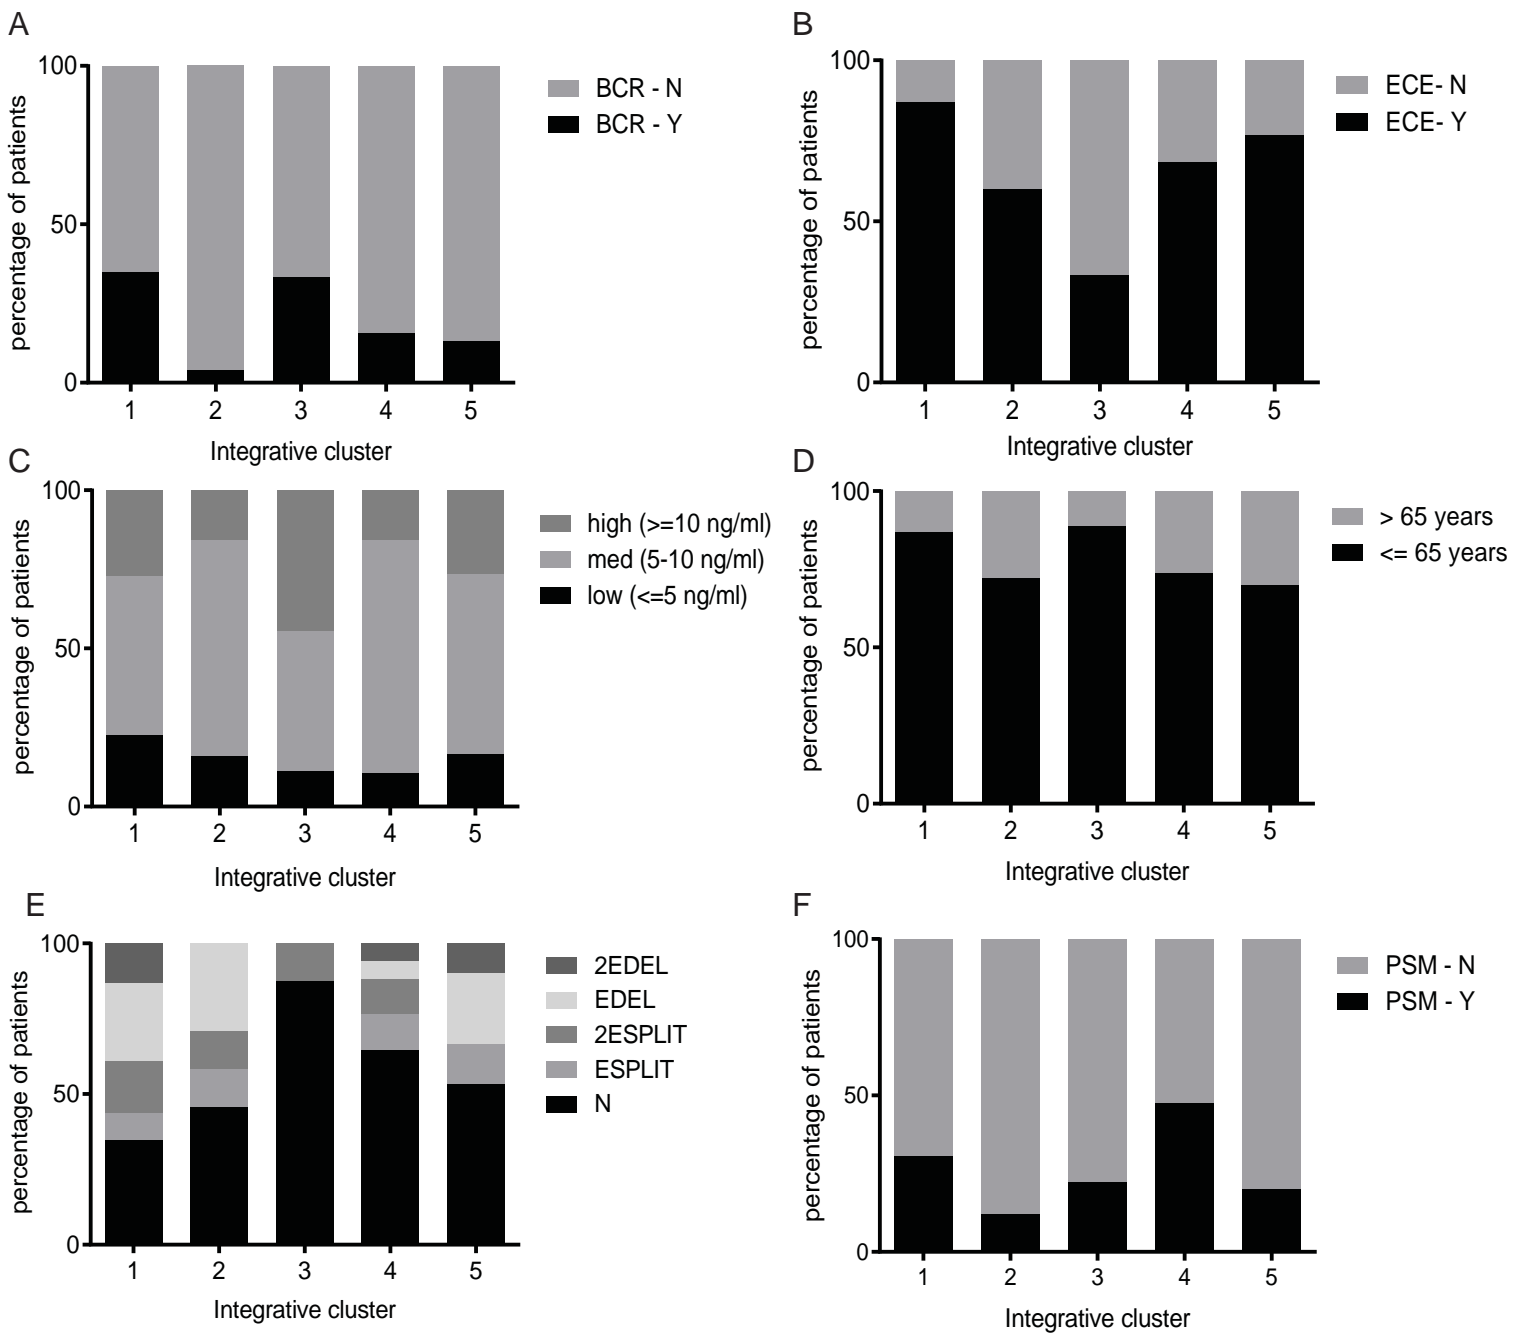

**Supplementary Figure 8. Additional display of clinical features across integrative clusters (Cambridge Discovery Cohort).**

- A.** Biochemical relapse (chi-sq p=0.0462).
- B.** Extra-capsular extension (chi-sq p=0.029).
- C.** Diagnostic PSA (Kruskal-Wallis p=0.2529).
- D.** Age (chi-sq p=0.5202).
- E.** TMPRSS2-ERG deletion status (K-W p=0.2751).
- F.** Positive surgical margins (chi-sq p=0.0912).

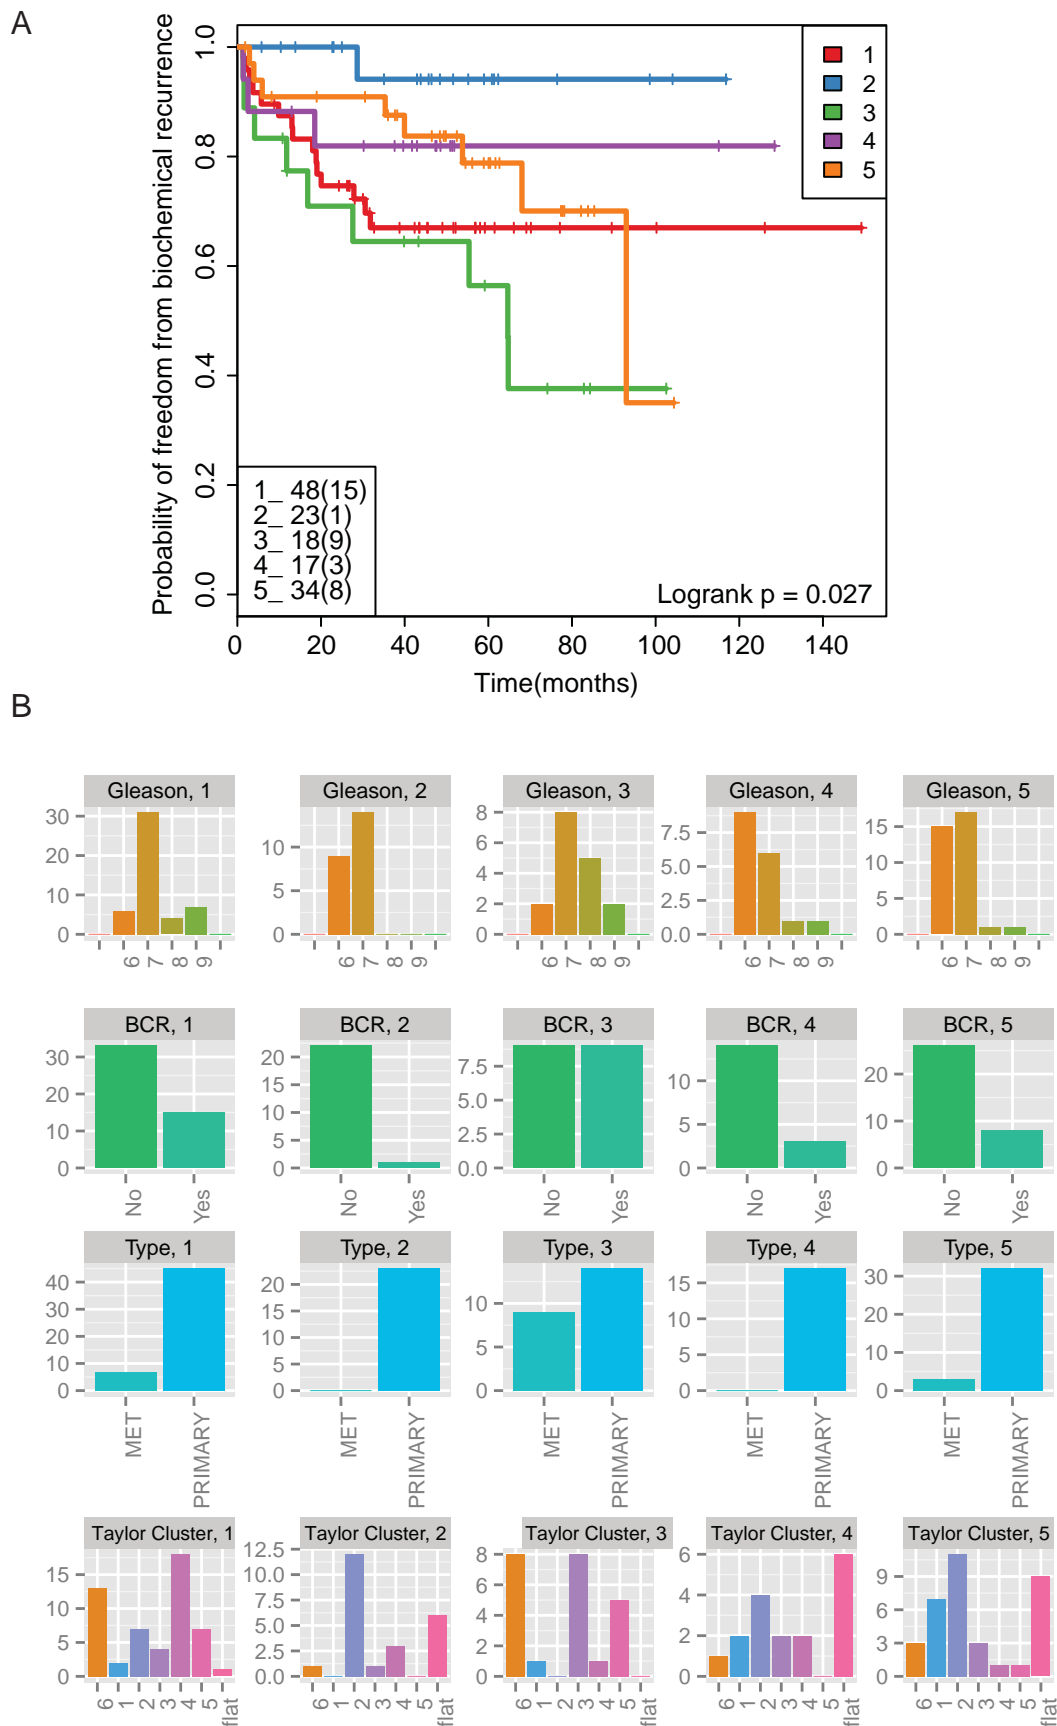

**Supplementary Figure 9. Further validation of integrative clusters in predicting biochemical relapse.**  
**A.** The five molecular subtypes identified in the discovery cohort were assessed in this third validation set with 120-month follow-up ( $p=0.027$ ; Taylor et al, 2010; see Supplementary Table 7 for clinical features of this cohort).  
**B.** Clinical features of each subgroup are shown.

**ERG gene set**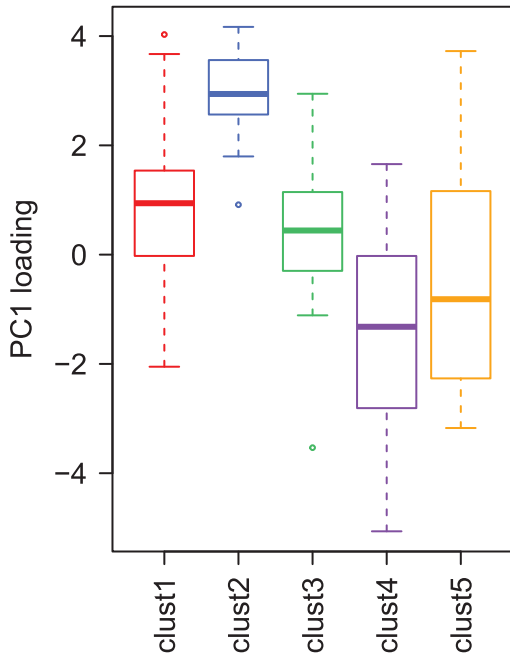**Mendiratta AR gene set**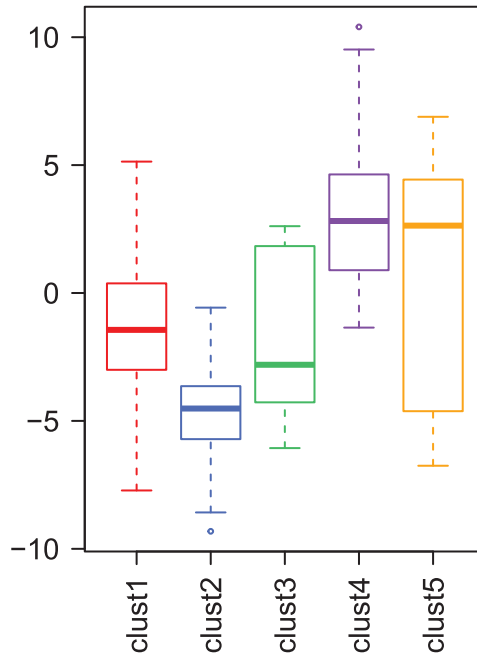**AR cell line down-regulated**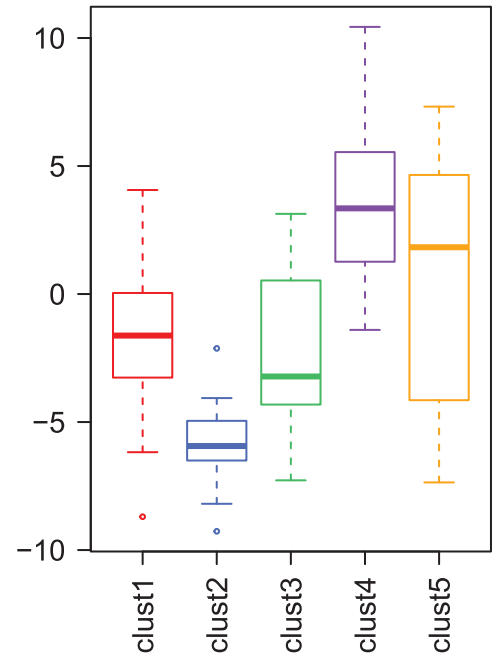**AR cell line up-regulated**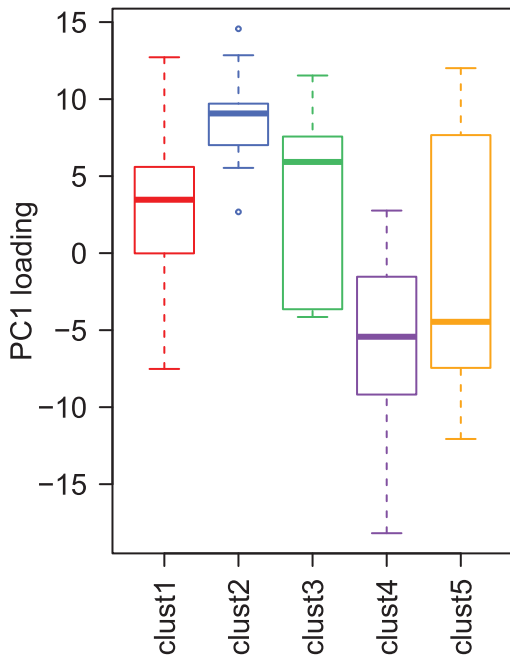**AR CRPC castration down**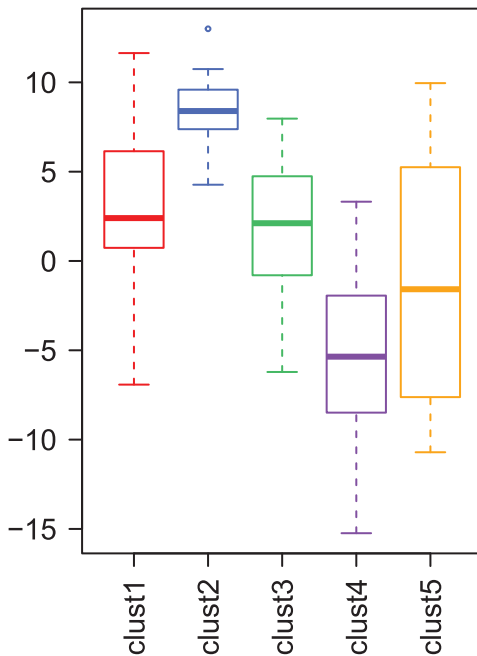**HES6 gene set**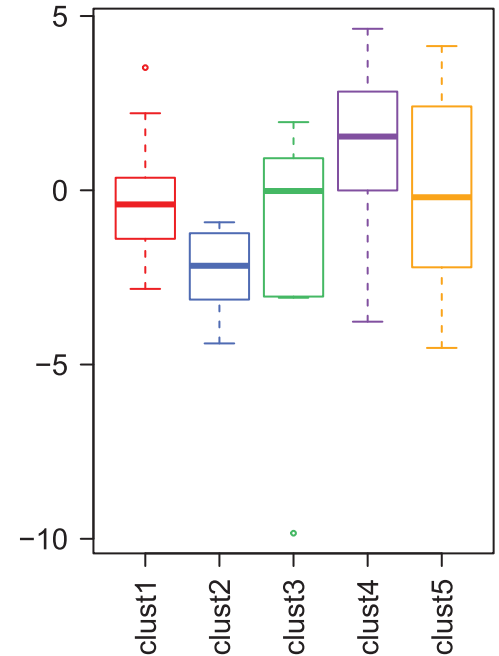

**Supplementary Figure 10. Integrated Clusters showed distinct expression of ERG, AR and HES6 gene sets.**

Principal components analyses (PCA) on the mRNA data from the Cambridge Discovery Cohort assessing the predominance of published gene sets in different integrated clusters (iCluster). Gene sets were identified from the following: ERG: Massie et al., (2010); Mendiratta et al. (2009), AR cell line up- and down-regulation: Massie et al., (2012); AR CRPC castration down (Sharma et al., 2013) and HES6 (Ramos-Montoya et al., 2014).

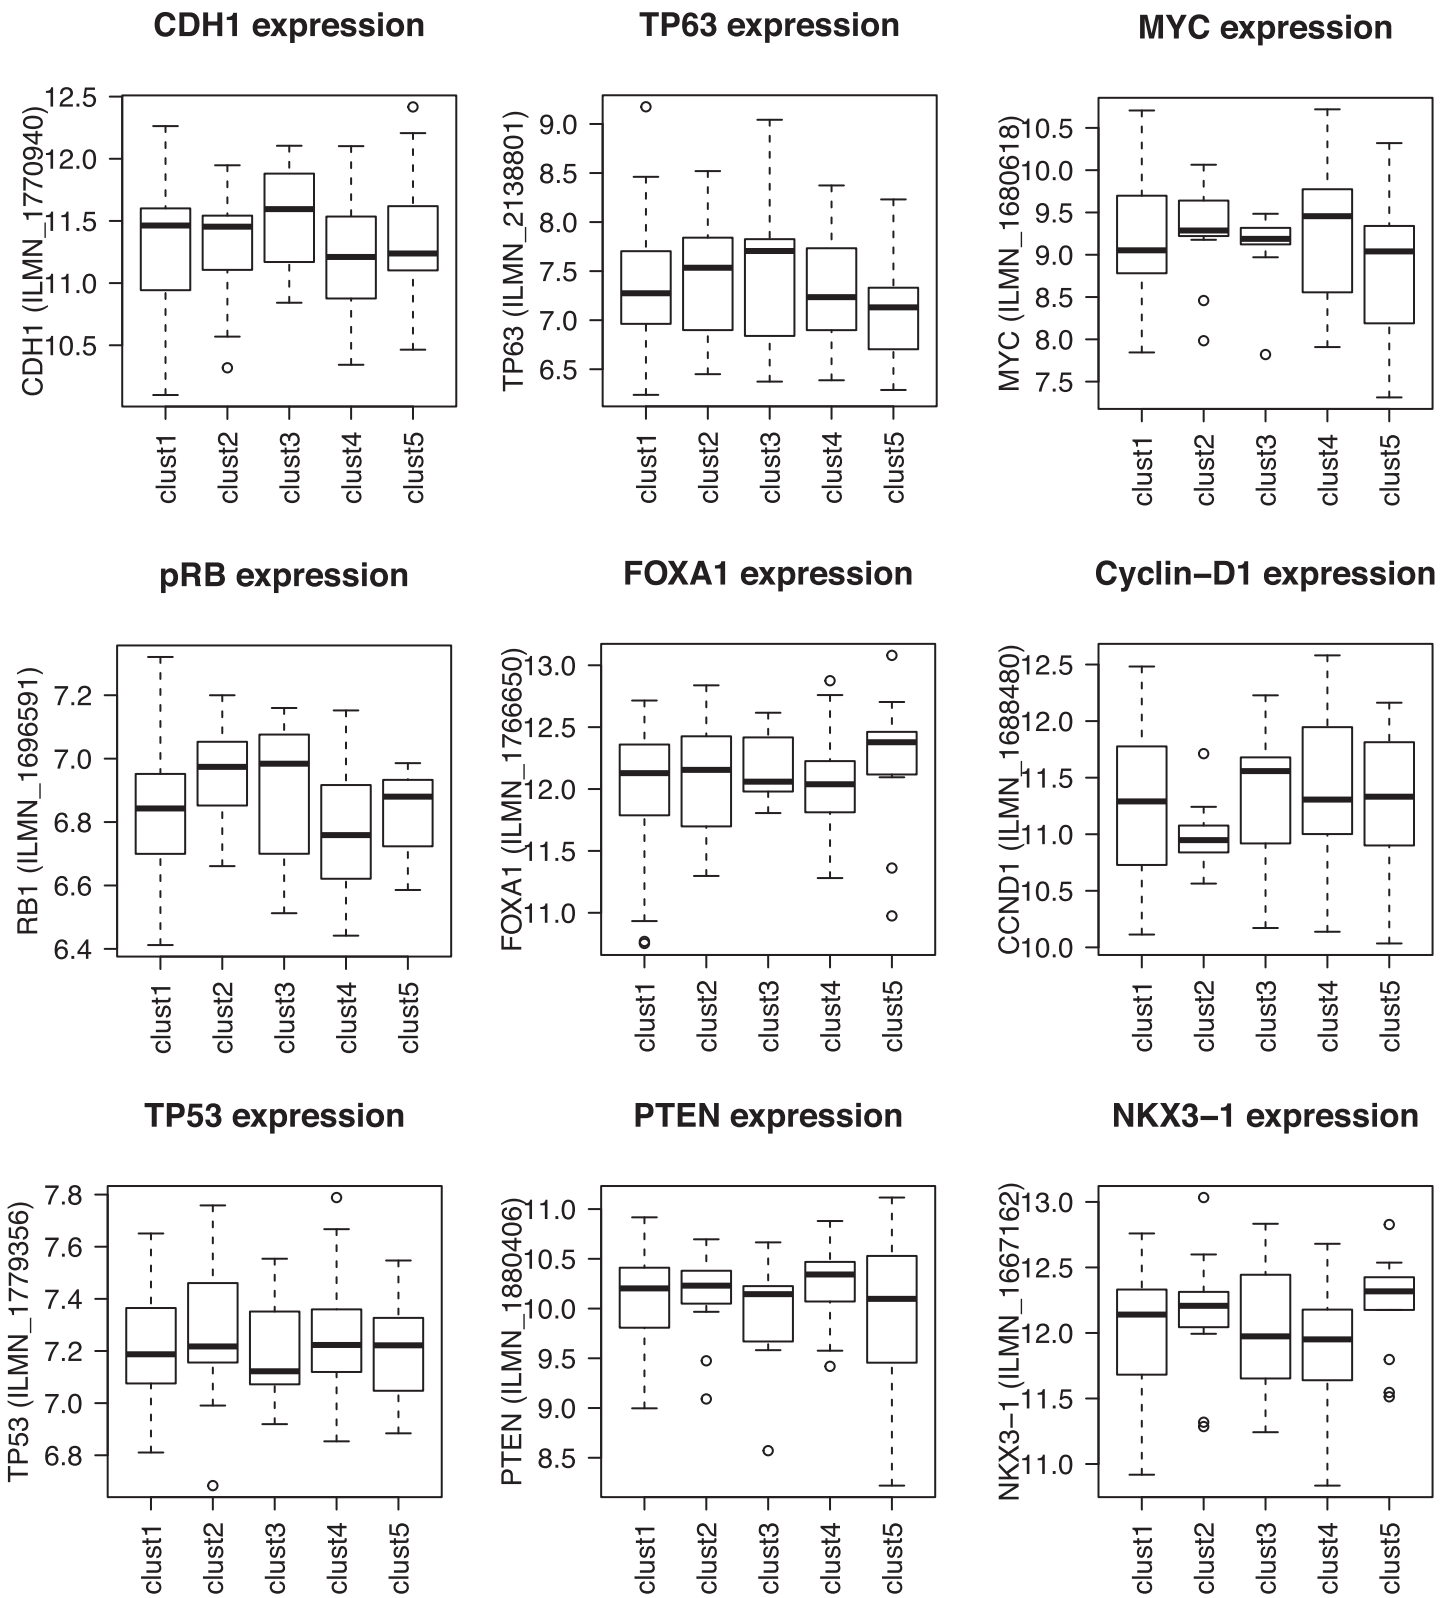

**Supplementary Figure 11. Integrated Clusters showed distinct expression of individual genes.**  
 Relative expression levels of key prostate cancer genes in each cluster in the Cambridge Discovery Cohort

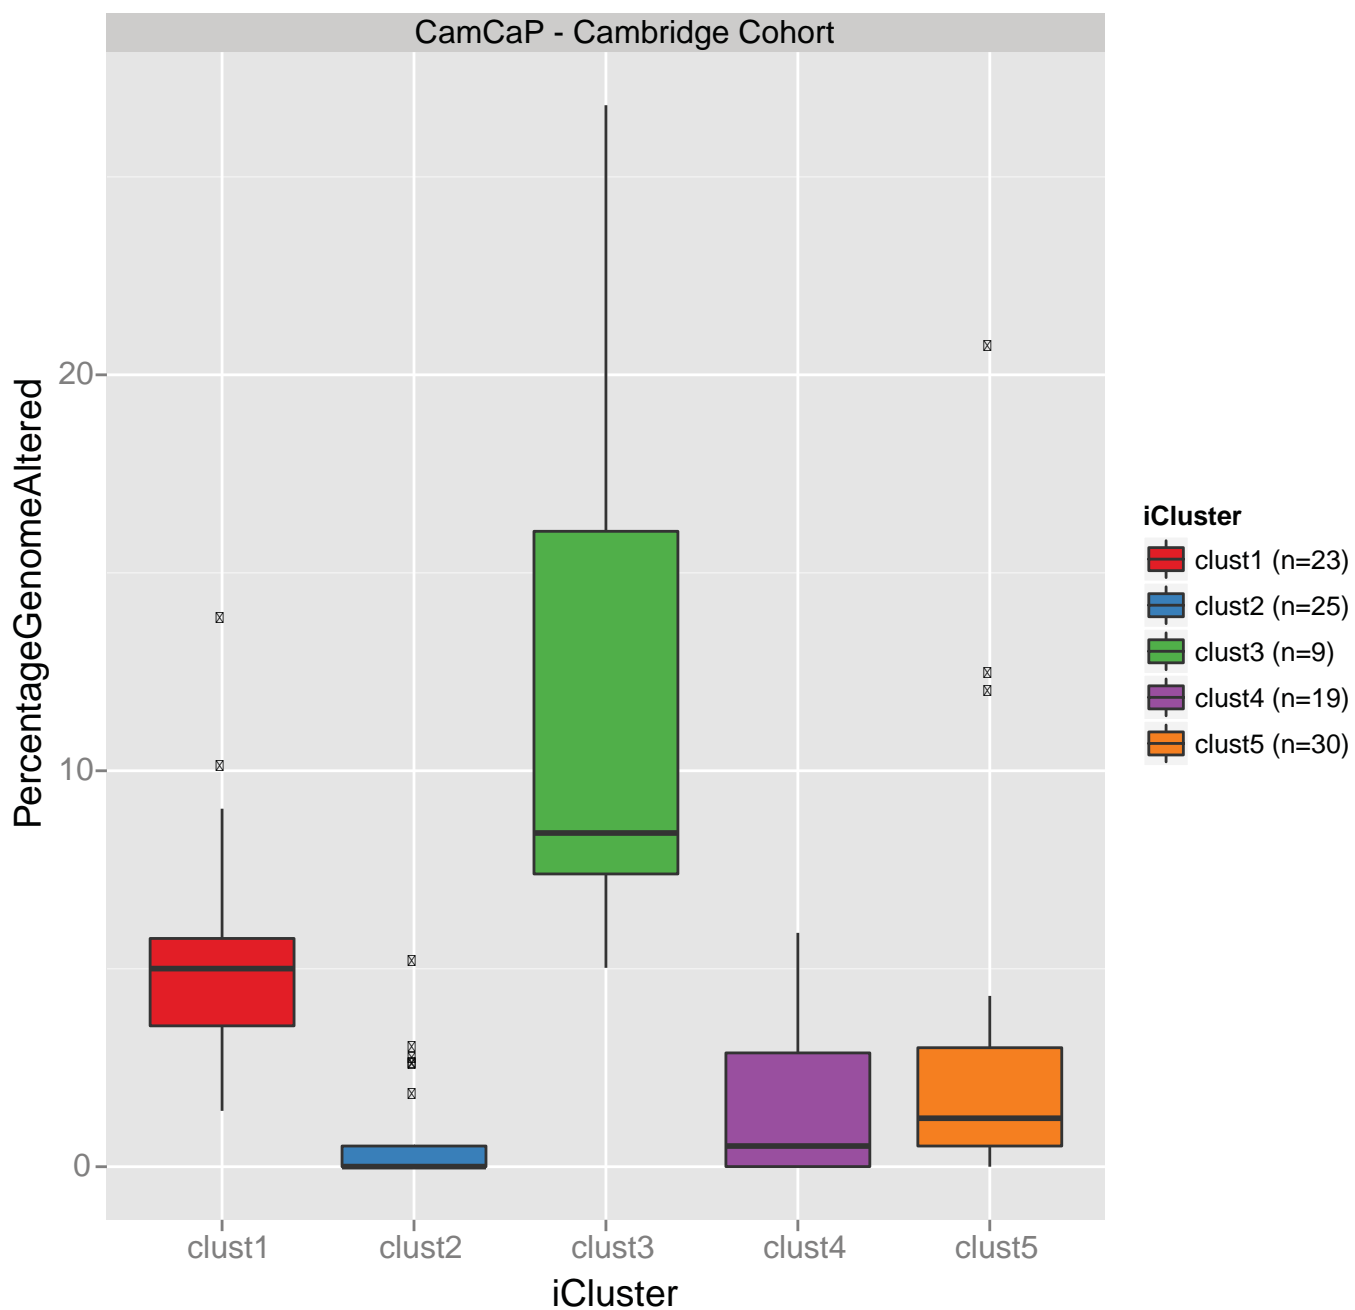

**Supplementary Figure 12. Percentage Genome Affected (PGA).**

The percentage of the genome affected by copy number change was calculated and mean value plotted for each cluster.

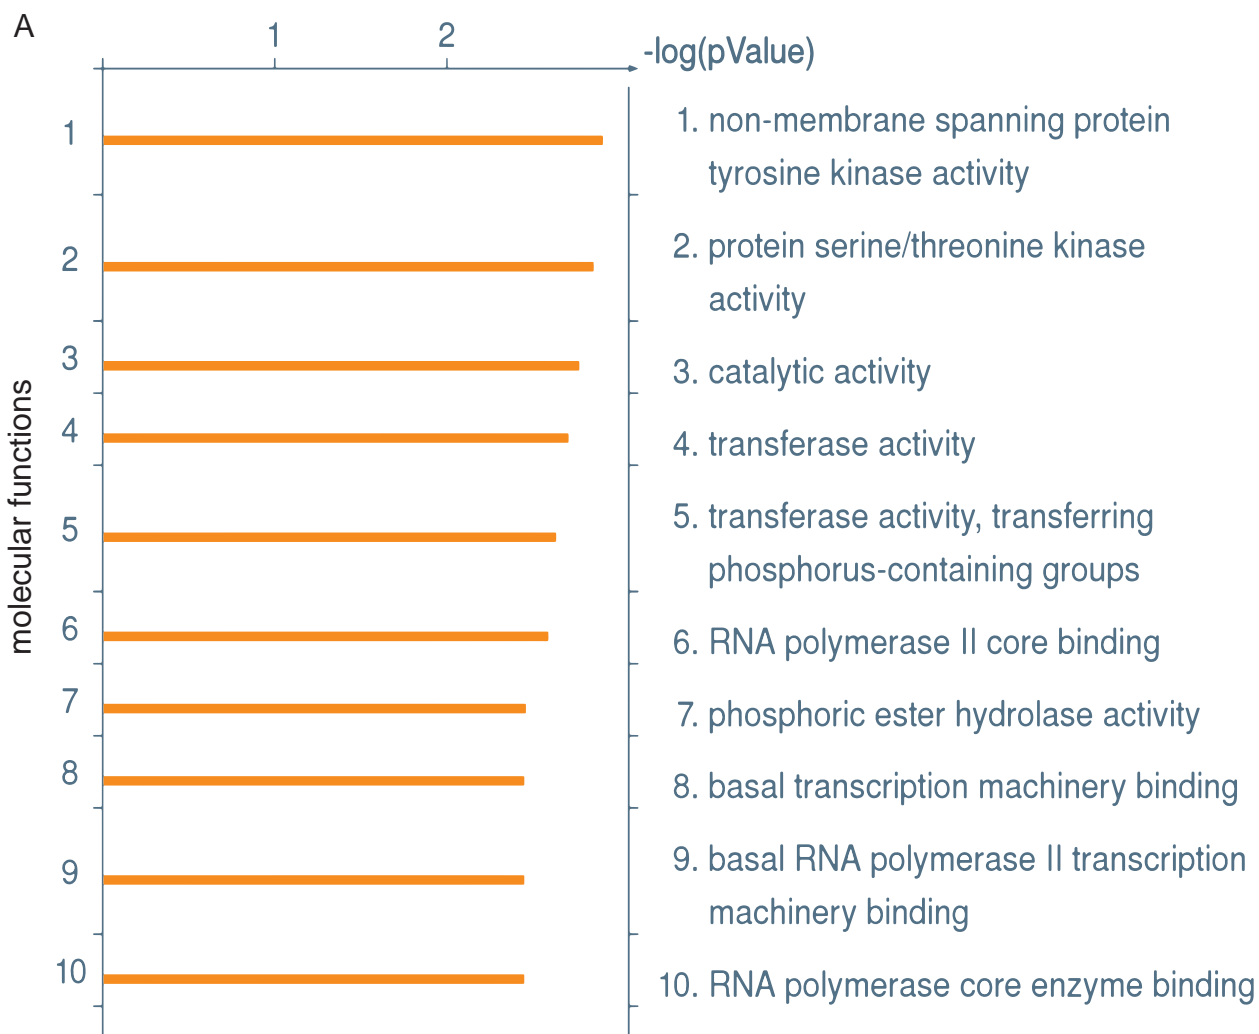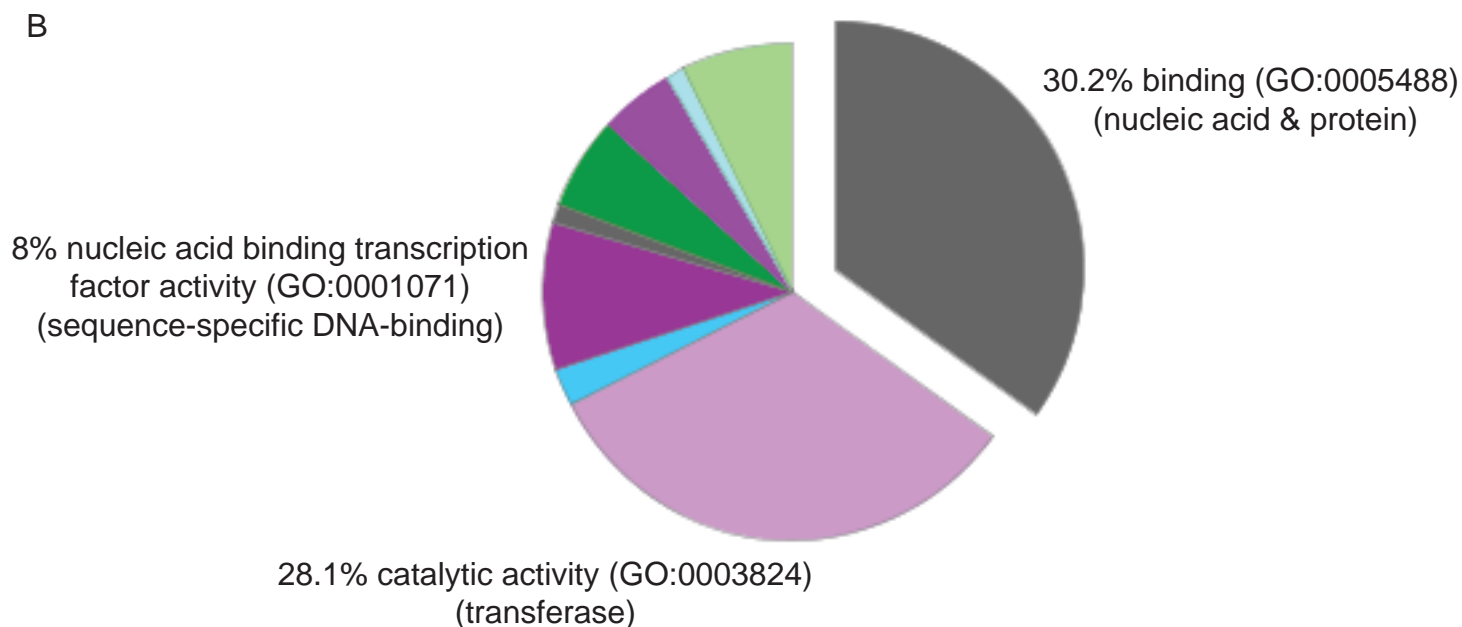

**Supplementary Figure 13. Gene ontology pathway analysis of the 100-gene set**

**A.** GeneGO MetaCore (Thomas Reuters) gene ontology analysis.

**B.** PantherDB ([www.pantherdb.org](http://www.pantherdb.org)) gene ontology analysis.

Both analyses identified enrichment of pathways relating to RNA and DNA processing – specifically sequence-specific transcription factor and nucleic acid binding – and the phosphorylation of proteins (particularly serine/threonine kinases) in this gene set.

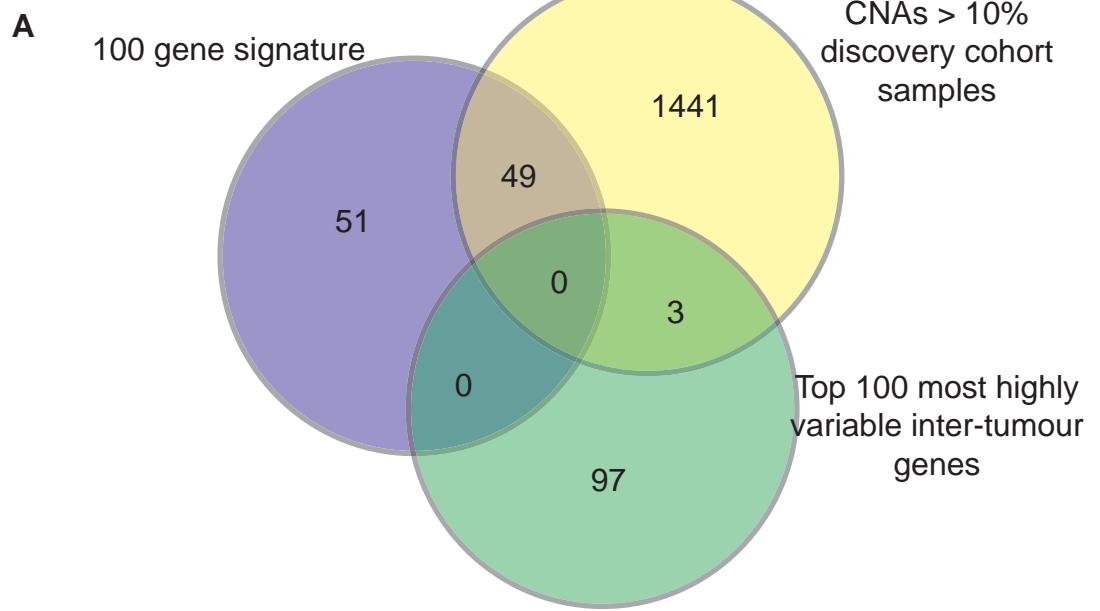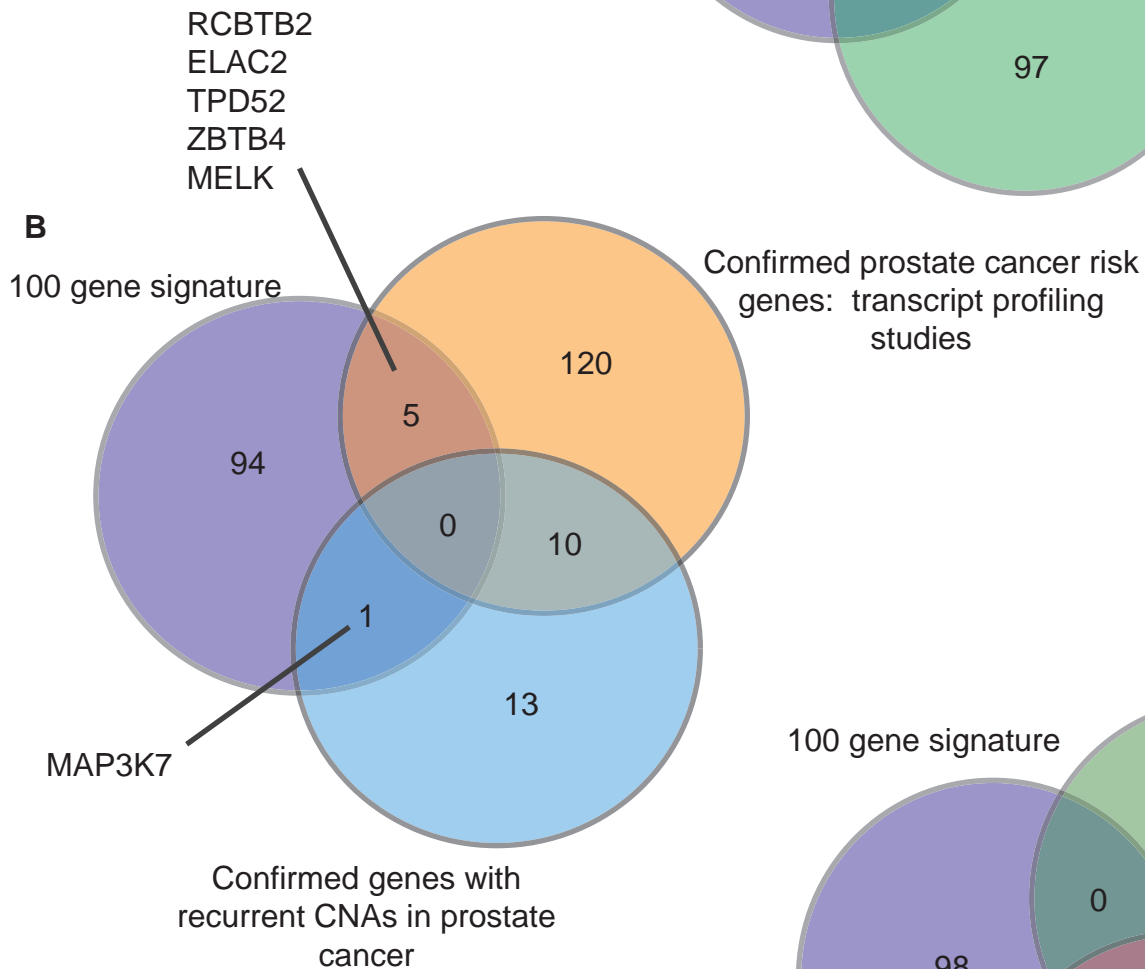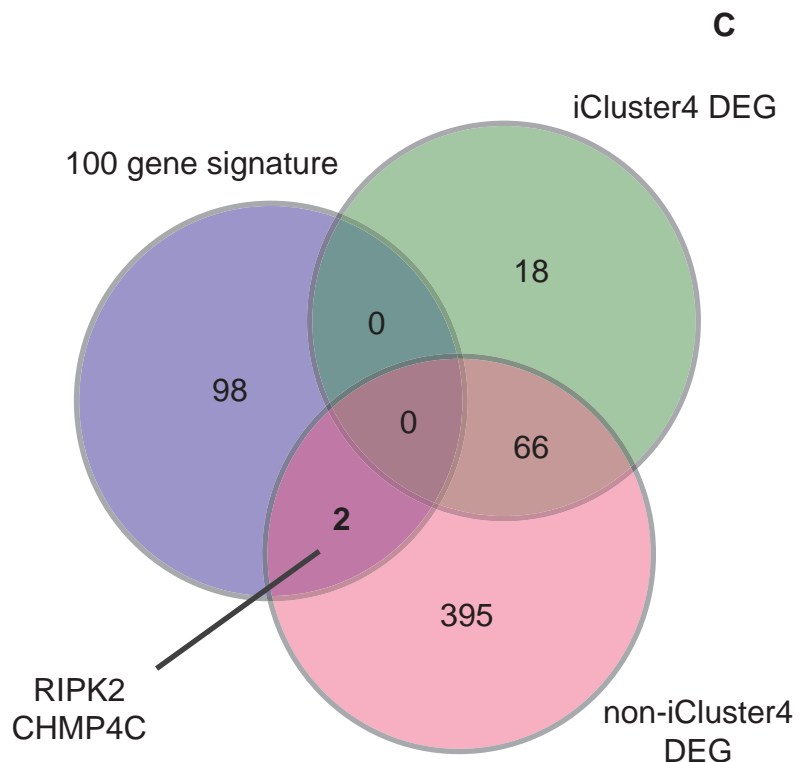

**Supplementary Figure 14. Comparison of 100-gene integrative gene set with known CN and gene expression loci.**

**A.** Within the Cambridge Discovery Cohort, only 3.3% (49/1490) of all CN changes (>10 % samples tested) were found in the 100-gene set. None of the top 100 most variable inter-tumour genes was included.

**B.** Only six risk genes from the 100-gene set have previously been described according to published meta-analyses – CN changes in MAP3K7 and gene expression changes in RCBTB2, ELAC2, TPD52, ZBTB4 and MELK. Our eQTL-based gene set therefore identifies 94 targets that would not have been identified using copy number or transcript profiling data alone.

**C.** Comparison of differentially expressed genes between iCluster4 and non-iCluster 4 identified CHMP4C and RIPK2 in the 100-gene set that could separate iCluster4 from non-iCluster4 using expression levels alone.

A

## Survival: Validation Set

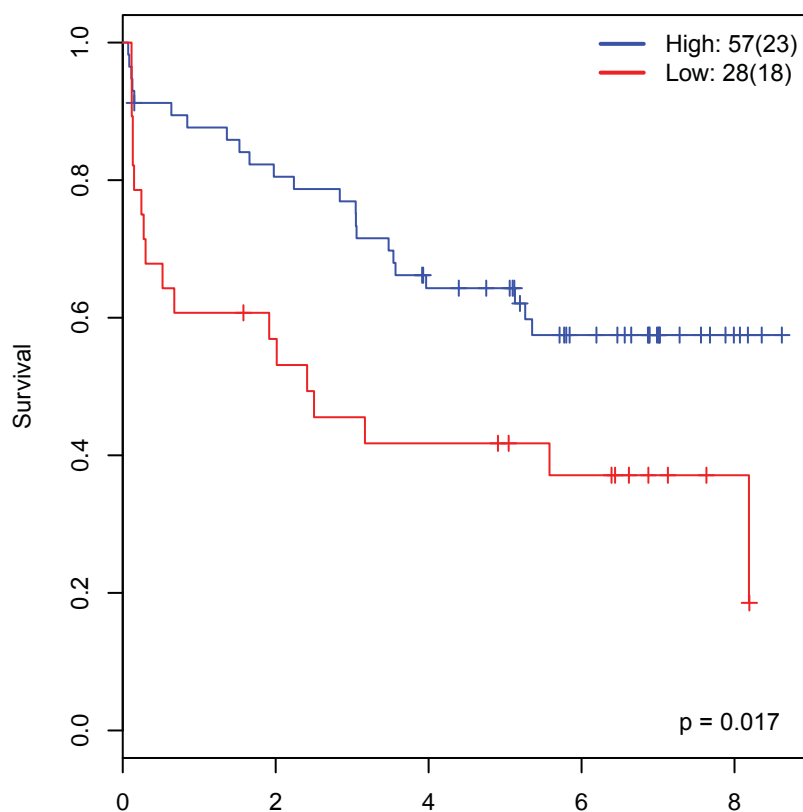

B

## Survival: Random Signatures

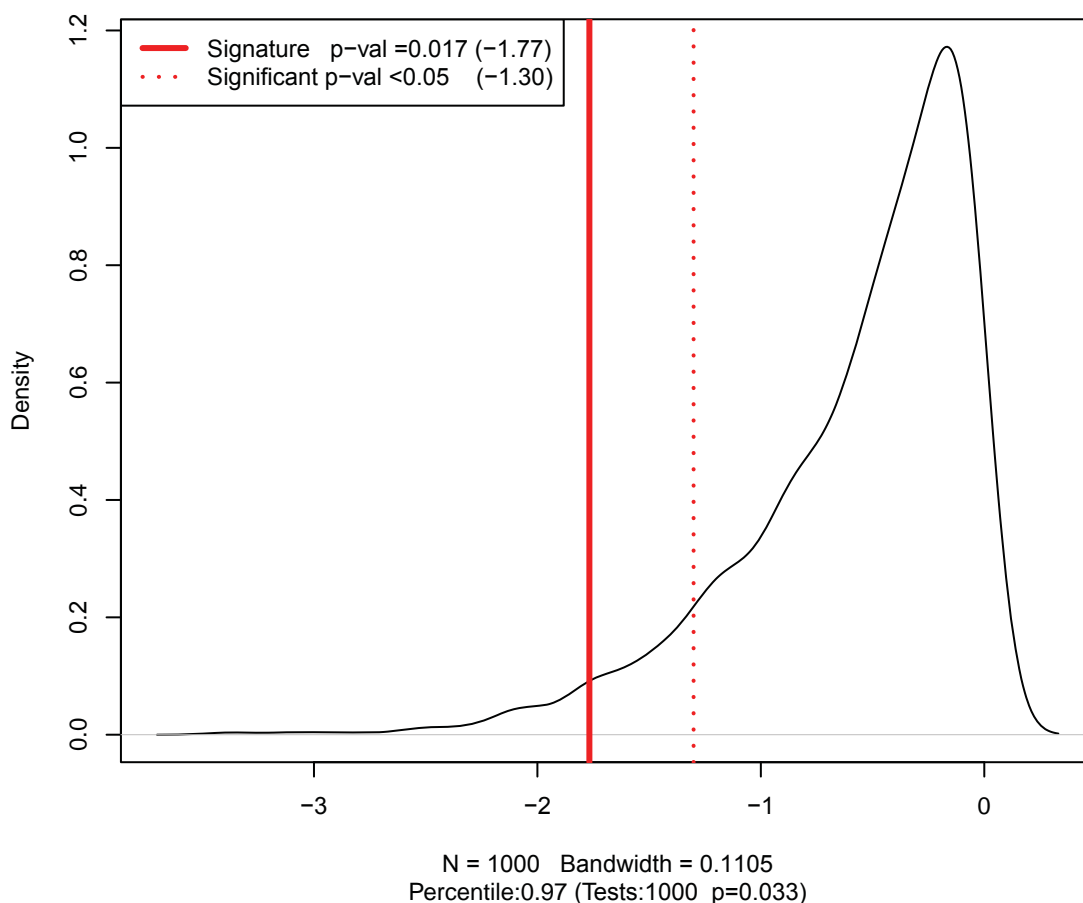

**Supplementary Figure 15. Performance of 100-gene set as predictive signature in Stockholm validation cohort.**

A. Kaplan-Meier plot of biochemical relapse-free survival in the Stockholm validation cohort over 96 months. Patient data were divided into two categories by calculating the mean value over all features for each sample; the 'high' enriched group comprised those samples >33rd percentile, while the 'low' enriched group consisted of samples  $\leq$  33rd percentile. Log-rank  $p$ -value = 0.017.

B. The 100-gene set was compared to 1 000 random signatures of the same size. The solid red vertical line shows the performance of the Cambridge signature, while the dotted red vertical line shows  $p = 0.05$ .



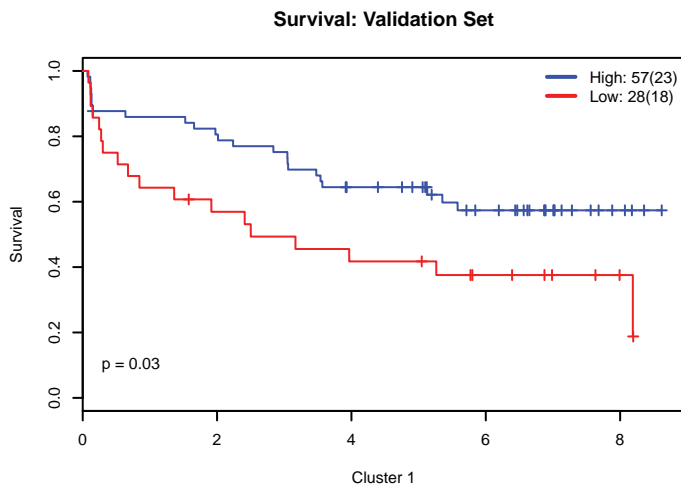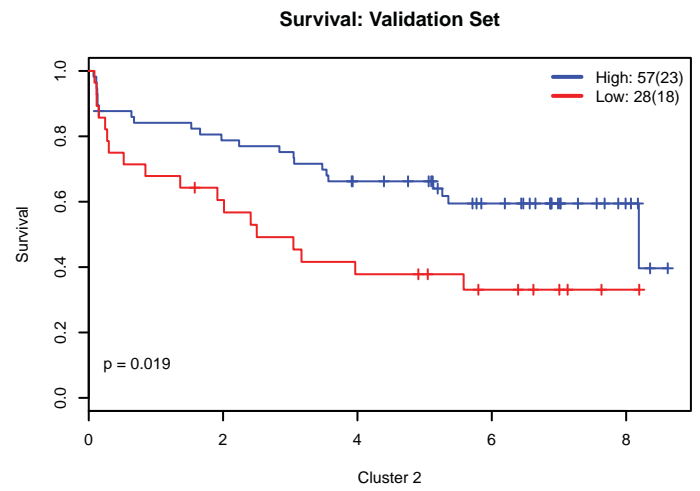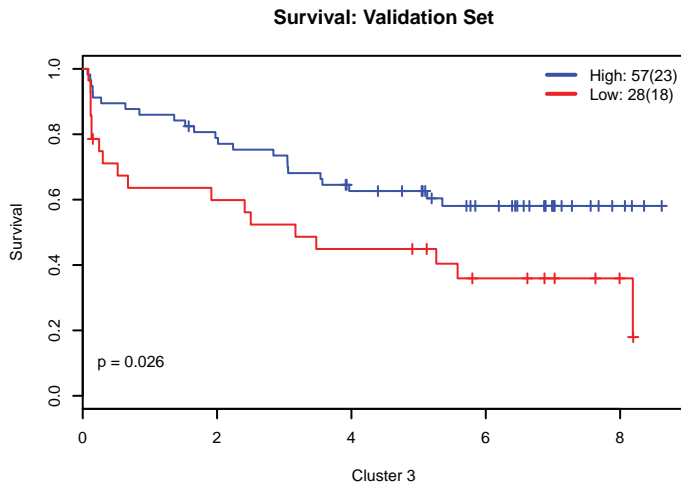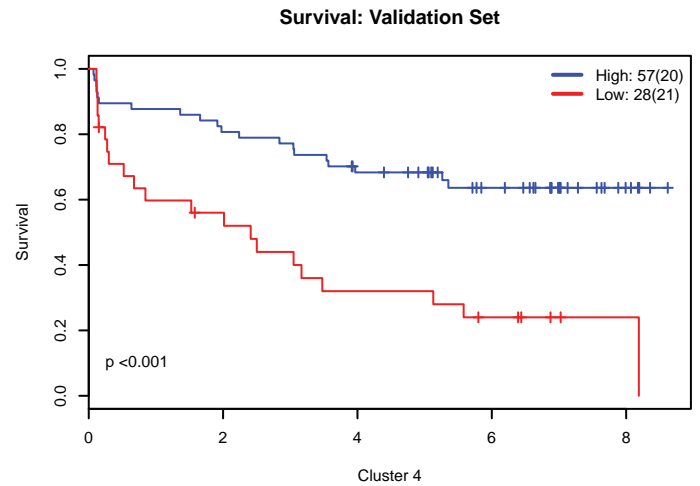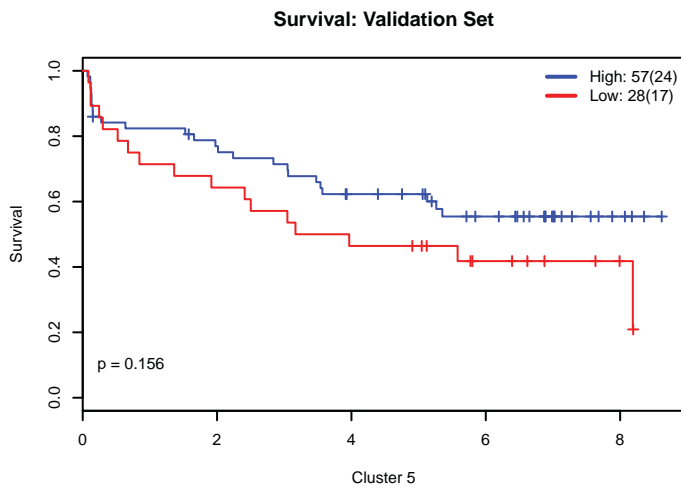

**Supplementary Figure 16. Relapse-free survival curves for cluster-specific signatures**

Kaplan Meier plots for each of the five clusters, using the 50-feature signatures from rankings computed by PAMR (Tibshirani et al., (2003), applied to the Stockholm validation set with no a priori clustering (see Suppl. Methods).

## Cluster 1

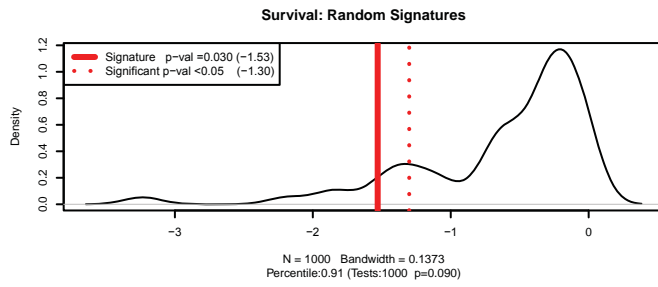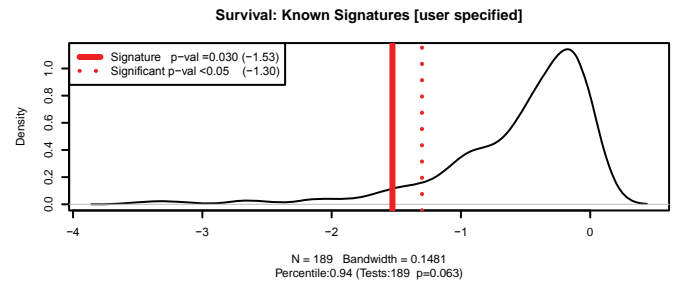

## Cluster 2

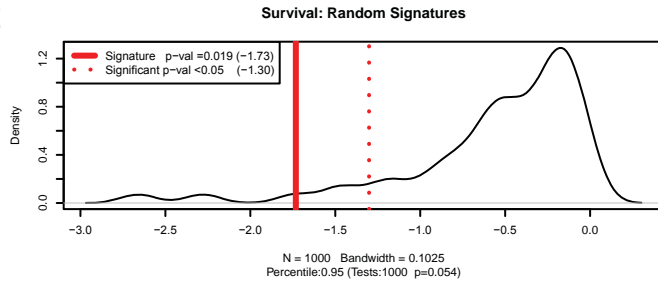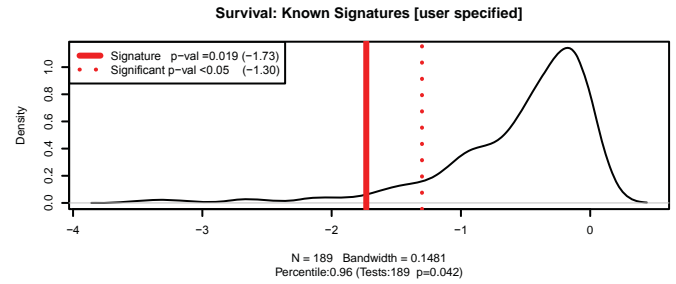

## Cluster 3

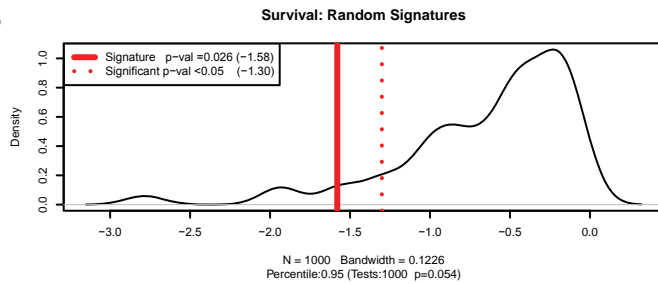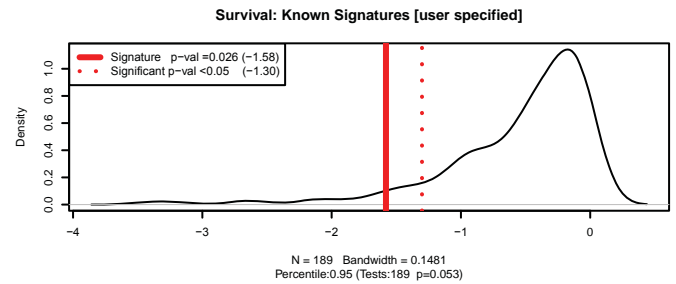

## Cluster 4

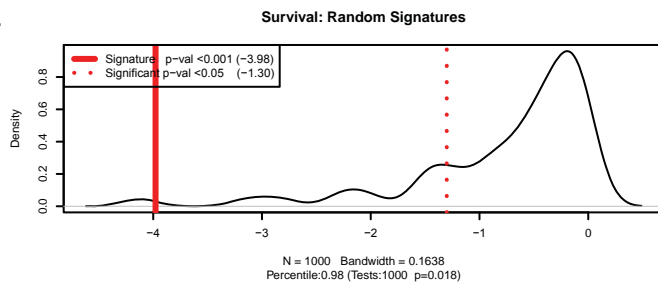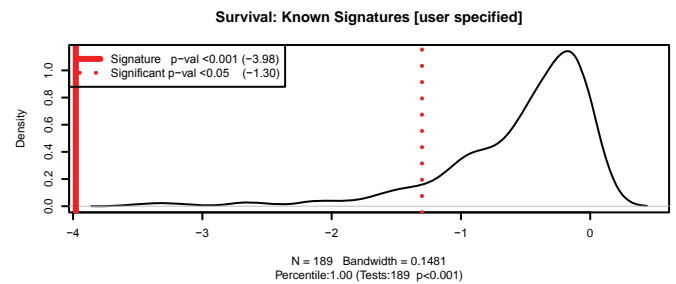

## Cluster 5

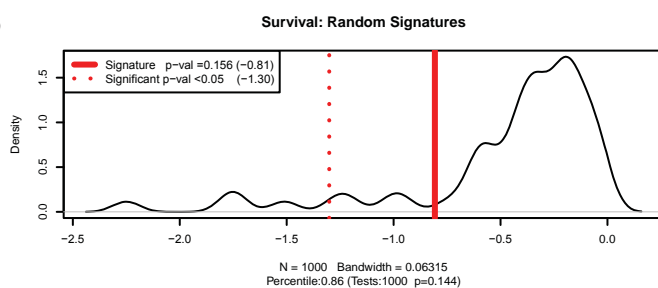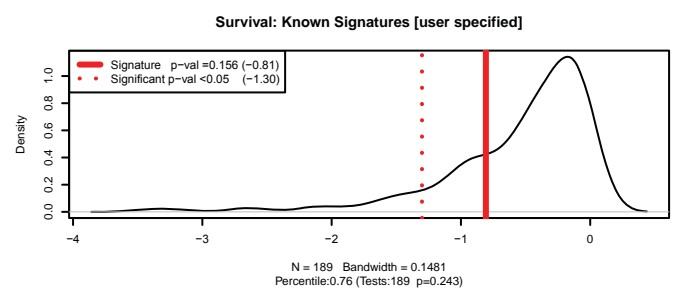

**Supplementary Figure 17. Cluster-specific refinement of 100-gene set improves prediction of relapse.** Subsets of the 100-gene set were identified that best describes each iCluster (see Suppl. Table 11 for gene lists, and Suppl. Methods). These were tested for power to predict relapse in the Stockholm validation set, against 1 000 random signatures of similar size (left column;  $p < 0.001$ ), and 189 oncological signatures (right column;  $p < 0.001$ ) (Subramanian et al., 2005). In each case, the solid red line shows the performance of each Cluster-specific gene signature, as compared to dotted red line  $p = 0.05$ , against the background/null distribution of the gene signatures tested.

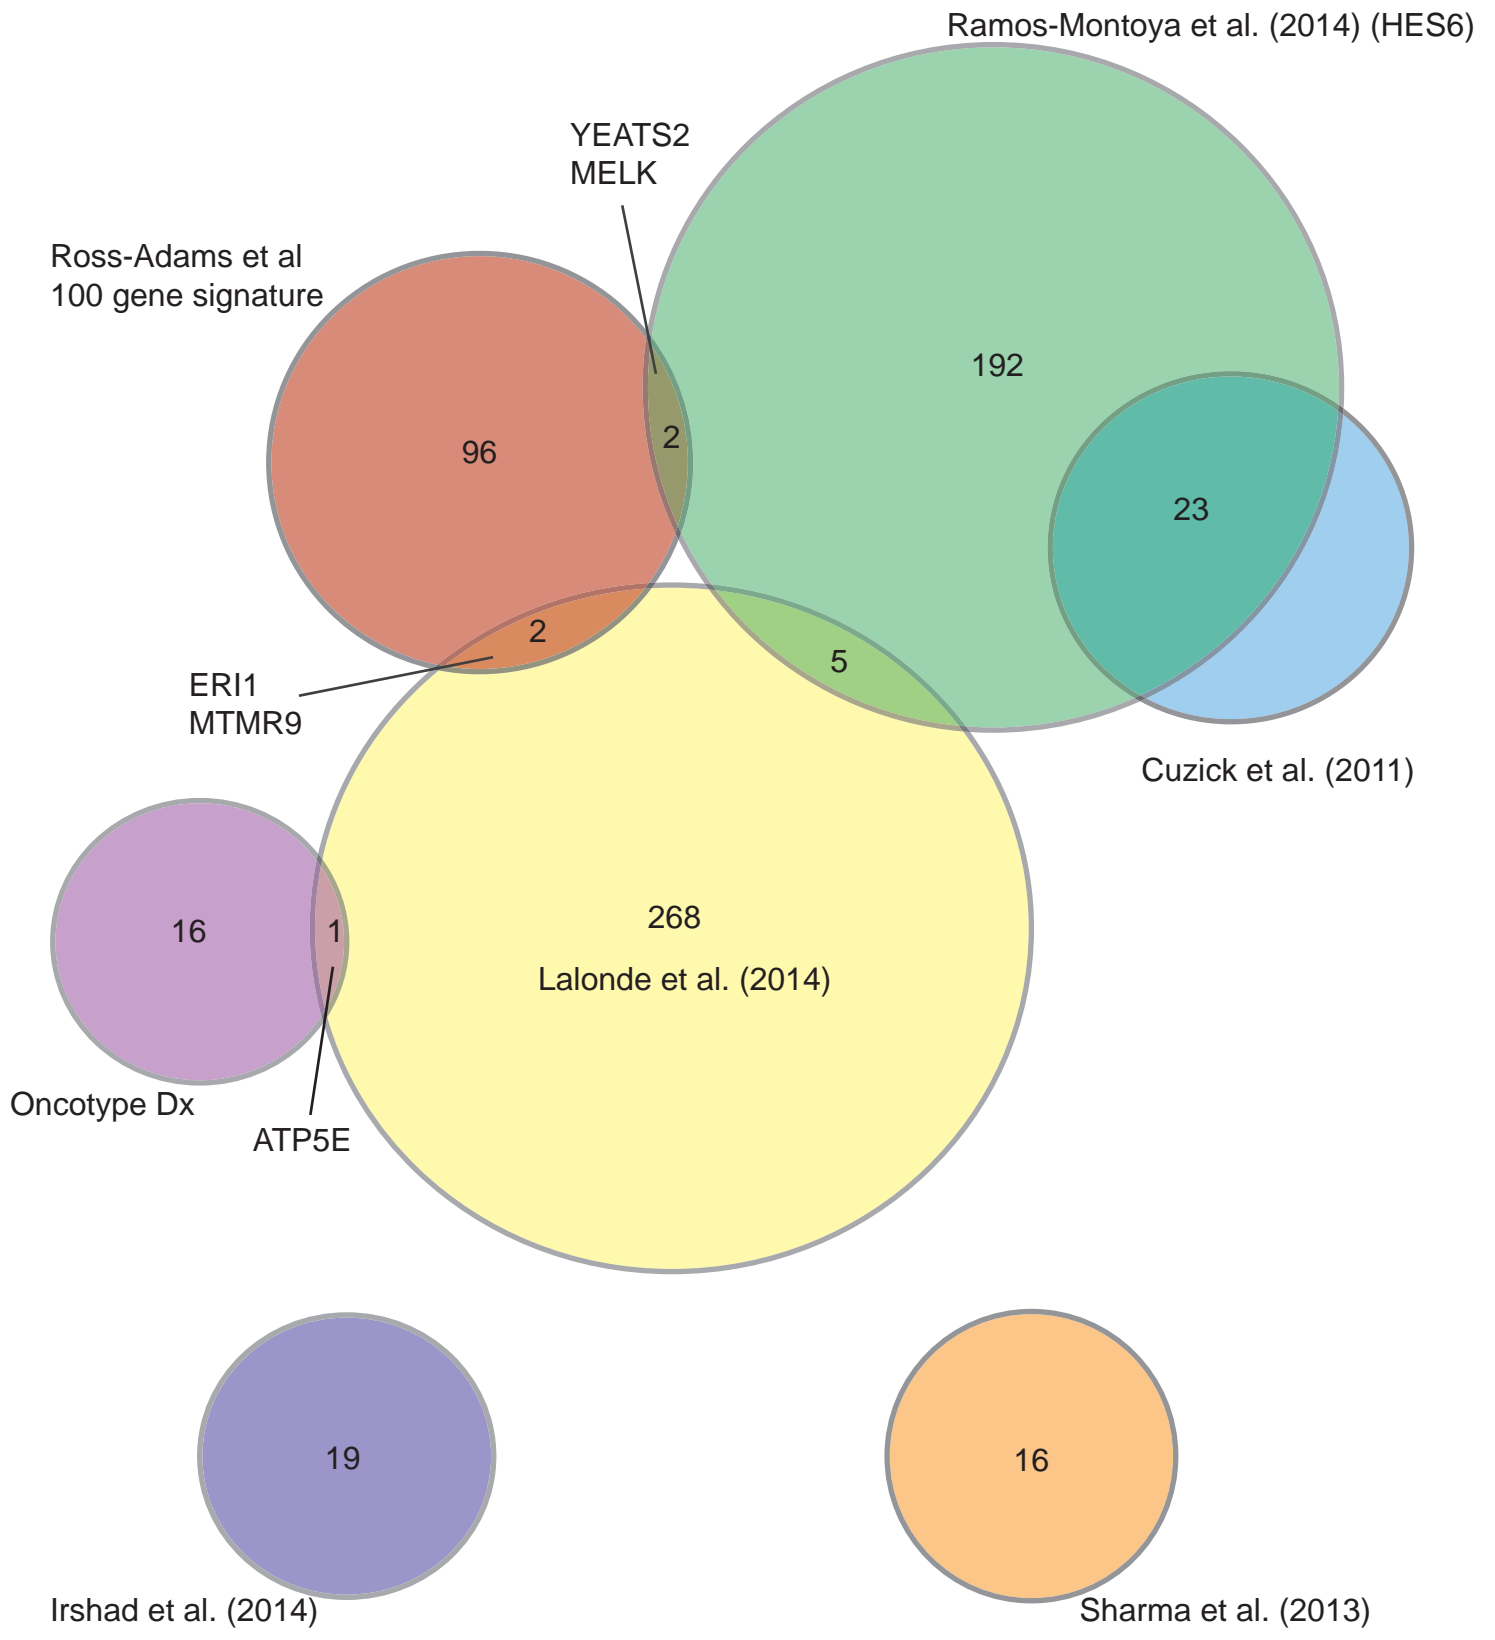

**Supplementary Figure 18. Published gene signature overlap.**  
 Intersects compared between our 100 gene-set and other published gene signatures as shown.

## SUPPLEMENTARY METHODS

### Integrative clustering

The GenomicRanges and GenomicFeatures infrastructure in Bioconductor was used to define a set of gene-centric coordinates for hg19, and to perform overlaps between the copy number and expression data.<sup>1</sup> For each gene in the TxDb.Hsapiens.UCSC.hg19.knownGene database, we computed a single copy-number and expression value for each sample. For the Cambridge cohort, copy number values were taken as the OncoSNP<sup>2</sup> Rank 1 call with most-aberrant log-ratio that overlapped the gene. For Stockholm, the longest segment overlapping the gene was used in order to remove short, spurious calls from the data. In both cohorts, gene-centric expression data were derived by first considering Illumina expression probes that overlapped the coordinates of each gene. In the case of multiple overlapping probes, the probe with the highest inter-quartile range (IQR) was used. An ANOVA test was used to compute a p-value, testing the association between expression and copy-number for each gene. All genes were then ranked according to this p-value; lowest (i.e. strongest evidence for association) to highest. The top N ranked genes were then taken forward for integrative analysis; where increasing values of N were used in order to determine to optimal number of features (see below).

Integrative analysis (cluster identification) was performed using copy number and gene expression data from the same 125 PC tissue samples in iCluster+<sup>3</sup>, with seed set to zero to ensure that the same parameters were generated each time where iCluster+ uses kNN (nearest neighbour) method. All features were included, and used to generate diagnostic plots in both discovery and validation cohorts. To increase stability, penalty parameters (lambda) were set to zero for all (no penalty). Variable selection was done after cluster generation, to reduce variability in results. Since the percentage variation explained naturally increases with an increase in number of clusters (and a reduction in cluster size), we selected the optimal  $k$  (5 clusters= $k+1$ ;  $k=4$ ) at the point beyond which additional sample divisions provided no significant improvement in variation explained – see Suppl. Fig 5. In-group proportions (IGP) were used to determine optimal number of  $k=4$  (5 clusters), where IGP is defined as the proportion of data in a group whose nearest neighbours are classified to the same group (Pearson's centred correlation).

The stability of iCluster+ was confirmed by considering the *distribution* of explained variation for each  $k$  after running 100 different analyses with 100 features each and a range of  $k=1$  to 10. There was no value for  $k$  after which the explained variation became more unstable; clusters were reliably reproduced. After training of the classifier using primary tumours of the Cambridge cohort with iCluster+<sup>3</sup>, pamr<sup>4</sup> in Bioconductor was used to predict clusters for the Cambridge CRPC samples, as well as in the Stockholm and Taylor et al., (2010)<sup>5</sup> validation cohorts.

### iCluster comparison

A core set of 106 samples pairs were used to accurately compare partitioning of samples based on either CN or mRNA or CN+mRNA data (integrative). We specified the iClusters to be 'true', and applied the recommended Adjusted Rand Index (ARI)<sup>6</sup> using fpc in Bioconductor to measure the relative accuracy of alternative clustering, where identical clustering gives ARI=1, and ARI=0 implies completely random re-clustering. Since there is no absolute threshold for similarity/divergence (but 0.35 would not occur by chance; Suppl. Table 6), and outputs must be considered relative to the set 'true' value, we also calculated the Variation of Information Index (VII)<sup>7</sup> in Bioconductor, where VII=0 for identical clustering and VII>0 for more disparate groupings; there is no maximum value.

## Cambridge prostate cancer (CamCaP) gene signature analysis

This section describes an analysis of the genes and features identified as driving our clustering, treated as a prognostic gene signature. The goal is to identify the ability of these genes to stratify patients into outcome groups, and to determine how unique they are in predicting outcome for prostate cancer patients.

### Genes, features, training set

We identified 100 genes for use in deriving tumour subtype clusters. For every sample, each of these genes has two features: a gene expression value and a copy number value. The genes were chosen based on a correlation between the expression value and the copy number values in the Cambridge (discovery) cohort samples (i.e. eQTL), here known as the *training/discovery set*.

### Validation Sets

Evaluation of the performance of the 100-gene set was performed using the Stockholm patient set, consisting of 103 samples, 99 with both copy number and expression and of which 85 samples had relapse information.

### Patient categories

Patients were divided into two categories using the 100-gene set by calculating the mean expression over all the features associated with genes in the signature for each sample, and selecting a “high” enriched group consisting of those above the 33<sup>rd</sup> percentile, and a “low” enriched group at or below the 33<sup>rd</sup> percentile.

### Prognostic power of the gene signature

The baseline test of the gene signature involved survival analyses on the validation data to determine the ability of the gene signature to separate a class of patients with worse outcome (as measured by time to relapse) from other, better performing patients. For this, we generated Kaplan-Meier plots, and computed associated p-values using a chi-squared test. For this test, the p-value was computed as  $p=0.017$  (Suppl. Fig 14A).

### Specificity of the gene signature

It has been shown that most oncogenic gene signatures are highly predictive of prognosis in breast cancer, even if they were derived using data for a different cancer<sup>8</sup>. We therefore performed a more rigorous set of tests to determine whether our gene signature had prognostic power beyond other possible gene sets. For this we used SigCheck in Bioconductor<sup>9</sup>. This package performs tests against randomly selected gene signatures, as well as sets of previously published signatures with discriminatory power value in various oncogenic contexts.

#### a. Compared to random sets of genes

We tested the p-value of our signature against a null distribution of random signatures of similar size (number of genes). This distribution is constructed by generating 1 000 random samples of 1 000 genes, and repeating the survival analysis for each set. An empirical p-value was computed by counting the number of random gene signatures with p-values equal to or lower than that computed to our gene signature. Our gene signature performed at the 97<sup>th</sup> percentile, for an empirical p-value computed at  $p=0.033$ . Suppl. Fig 14B shows how the signature compares to the background distribution of randomly selected 100-gene signatures.

## b. Compared to known gene signatures

The second set of tests is against previously published gene signatures. We use two sets of cancer signatures.

1. A set of 189 oncogenic signatures in MSigDB<sup>10</sup>.  
Our signature performed at the 96<sup>th</sup> percentile, for an empirical p-value of  $p=0.042$ .
2. A set of six signatures specific to prostate cancer:
  - Sharma (2013): 16 genes relating to CRPC<sup>11</sup>
  - Cuzick (2011): 31 genes relating to prognosis in primary PC<sup>12</sup>
  - Irshad (2013): 19 genes relating to indolent PC<sup>13</sup>
  - HES6 (2014): A set of 222 genes associated with HES6 & CRPC<sup>14</sup>
  - Lalonde (2014): A set of 276 genes (corresponding to 100 loci) relating to chromosome instability, and predicting <5 year relapse (intended to be used with copy number data only)<sup>15</sup>
  - OncoTypeDx: A set of 17 genes on commercial Oncotype Dx prognostic arrays

Not only did our signature outperform all six of these, none of the previously identified prostate-cancer specific signatures achieved significant results on the Stockholm dataset, mean gene expression:

| <u>Signature</u> | <u>p-value</u> |
|------------------|----------------|
| SHARMA           | 0.174          |
| CUZICK           | 0.263          |
| IRSHAD           | 0.853          |
| HES6             | 0.189          |
| LALONDE          | 0.495          |
| ONCOTYPEDX       | 0.732          |

## Cluster-specific signatures

In our final analysis of signature performance, we looked at the features *within* our 100 gene set that were most important for defining our five clusters, yielding five distinct prognostic signatures (one for each cluster). We wanted to see if any of these five clusters had particularly interesting prognostic power.

We obtained a signature for each cluster by ranking the importance of features on a classification task, separating the samples in that cluster from those in other clusters. This was repeated for each cluster. As we had 100 genes and two features for each gene (expression and copy number), we had a total of 200 features from which to select a signature. For this analysis, we generated signatures comprised of the genes corresponding to the 50 highest-ranked *features* for each cluster, selected using rankings computed by the PAMR package in Bioconductor<sup>4</sup>. These signatures were then each applied to the Stockholm validation set (with no *a priori* clustering) (Suppl. Fig 16). When both the copy number and expression features for the same gene were used, these mapped to only one gene in the signature, so there could be as few as 25 genes in a signature.

Four out of five of the clusters exhibited significant ability to separate a poor outcome class in the Stockholm validation set, as shown in Suppl. Fig 15 and Table 3. In addition, it showed how none of the five previously identified signatures or the commercially available OncoType Dx gene signature, was able to separate a distinct survival group using mean expression values. We next compared the performance of the cluster signatures to 1 000

signatures of equivalent size (number of genes), as well as 189 previously identified oncogenic signatures (see Suppl. Fig 16).

The best performing cluster signature is that obtained for iCluster4 (purple curve; figure 3). On the survival task, we calculated a p-value of 0.0001. When compared to random signatures, iCluster4 signature performed in the 98<sup>th</sup> percentile for an empirical p-value of  $p=0.018$ . This signature also out-performed all 189 oncogenic signatures from MSigDB (Suppl. Fig 16 & Suppl. Table 9). These are presented in PAMR-ranked order of importance in discriminating the cluster. Further investigation showed that not all 50 genes are required to generate good survival performance in the Stockholm validation set, with even lower p-values obtained for as few as 15-20 genes. However, we strictly applied the same criteria for all five signatures in the discovery cohort, and did not select a lower cut-off that performed better in the validation set, since performance in a validation set cannot be used to set any parameters.

## Supplementary Methods - References

1. Lawrence M, Huber W, Pagès H, et al. Software for Computing and Annotating Genomic Ranges. *PLoS Comput Biol* 2013; **9**(8): e1003118.
2. Yau C, Mouradov D, Jorissen RN, et al. A statistical approach for detecting genomic aberrations in heterogeneous tumor samples from single nucleotide polymorphism genotyping data. *Genome biology* 2010; **11**(9): R92.
3. Mo Q, Wang S, Seshan VE, et al. Pattern discovery and cancer gene identification in integrated cancer genomic data. *Proceedings of the National Academy of Sciences of the United States of America* 2013; **110**(11): 4245-50.
4. Tibshirani R, Hastie T, Narasimhan B, Chu G. Class Prediction by Nearest Shrunken Centroids, with Applications to DNA Microarrays. 2003: 104-17.
5. Taylor BS, Schultz N, Hieronymus H, et al. Integrative genomic profiling of human prostate cancer. *Cancer cell* 2010; **18**(1): 11-22.
6. Hubert L, Arabie P. Comparing partitions. *Journal of Classification* 1985; **2**(1): 193-218.
7. Meilă M. Comparing clusterings—an information based distance. *Journal of Multivariate Analysis* 2007; **98**(5): 873-95.
8. Venet D, Dumont JE, Detours V. Most Random Gene Expression Signatures Are Significantly Associated with Breast Cancer Outcome. *PLoS Comput Biol* 2011; **7**(10): e1002240.
9. Norden JS, Rory. SigCheck: Check a gene signature's classification performance against random signatures, permuted data, and known signatures. R package version 1.0.2. ed; 2014.
10. Subramanian A, Tamayo P, Mootha VK, et al. Gene set enrichment analysis: A knowledge-based approach for interpreting genome-wide expression profiles. *Proceedings of the National Academy of Sciences* 2005; **102**(43): 15545-50.
11. Sharma NL, Massie CE, Ramos-Montoya A, et al. The androgen receptor induces a distinct transcriptional program in castration-resistant prostate cancer in man. *Cancer cell* 2013; **23**(1): 35-47.
12. Cuzick J, Swanson GP, Fisher G, et al. Prognostic value of an RNA expression signature derived from cell cycle proliferation genes in patients with prostate cancer: a retrospective study. *The Lancet Oncology* 2011; **12**(3): 245-55.
13. Irshad S, Bansal M, Castillo-Martin M, et al. A molecular signature predictive of indolent prostate cancer. *Science translational medicine* 2013; **5**(202): 202ra122.
14. Ramos-Montoya A, Lamb AD, Russell R, et al. HES6 drives a critical AR transcriptional programme to induce castration-resistant prostate cancer through activation of an E2F1-mediated cell cycle network. *EMBO Mol Med* 2014; **6**(5): 651-61.
15. Lalonde E, Ishkanian AS, Sykes J, et al. Tumour genomic and microenvironmental heterogeneity for integrated prediction of 5-year biochemical recurrence of prostate cancer: a retrospective cohort study. *The Lancet Oncology* 2014; **15**(13): 1521-32.



## CASE EXAMPLE

### **Integration of copy number and transcriptomics provides risk stratification in prostate cancer: a discovery and validation cohort study**

H Ross-Adams<sup>1\*</sup>, AD Lamb<sup>1,2,3\*</sup>, MJ Dunning<sup>1\*</sup>, S Halim<sup>1</sup>, J Lindberg<sup>4</sup>, CM Massie<sup>1</sup>, LA Egevad<sup>5</sup>, R Russell<sup>1</sup>, A Ramos-Montoya<sup>1</sup>, S Vowler<sup>1</sup>, NL Sharma<sup>6</sup>, J Kay<sup>1,7</sup>, H Whitaker<sup>1,7</sup>, J Clark<sup>8</sup>, R Hurst<sup>8</sup>, VJ Gnanapragasam<sup>2,3</sup>, NC Shah<sup>2</sup>, AY Warren<sup>9</sup>, CS Cooper<sup>8</sup>, AG Lynch<sup>1</sup>, R Stark<sup>1</sup>, IG Mills<sup>1,10,11,12</sup>, H Grönberg<sup>3†</sup>, DE Neal<sup>1,2†</sup> on behalf of the CamCaP Study Group‡

Men who have clinically low risk disease at diagnosis but who turn out to have unexpectedly aggressive disease are a problem for the prostate cancer medical community. There seem to be two principal reasons for this. The first is sampling error. Prostate biopsies cannot sample the whole prostate gland with complete accuracy and therefore may miss the dominant tumour nodule. But the second is that our current methods in disease risk stratification are inadequate. In our study we have proposed a molecular classification for men with prostate cancer that will improve such stratification.

We present here a case where such molecular knowledge, derived from information discovered in our study, would have changed clinical management.

#### Case

This man was diagnosed with prostate cancer in 2008 and his key clinical parameters are outlined below.

|               | Diagnostic Biopsy     | Radical Prostatectomy |
|---------------|-----------------------|-----------------------|
| Gleason Score | 3+3=6; 3/10 cores; 5% | 3+4=7                 |
| PSA           | 4.3                   | No change             |
| TNM           | T1cN0Mx               | T2aN0Mx               |
| ECE           | N/A                   | No                    |
| SMS           | N/A                   | Negative              |

On the basis of these details he would be considered to have low risk prostate cancer according to D'Amico criteria at biopsy. He was upgraded and upstaged at prostatectomy but would still have been considered to be at relatively low risk of relapse (see Figure 1). If the Memorial Sloane Kettering nomogram is used (<https://www.mskcc.org/nomograms/prostate/pre-op>) then he would be considered to have a probability of progression-free survival at 5 years of 94% based on the diagnostic biopsy and 91% based on the prostatectomy specimen.

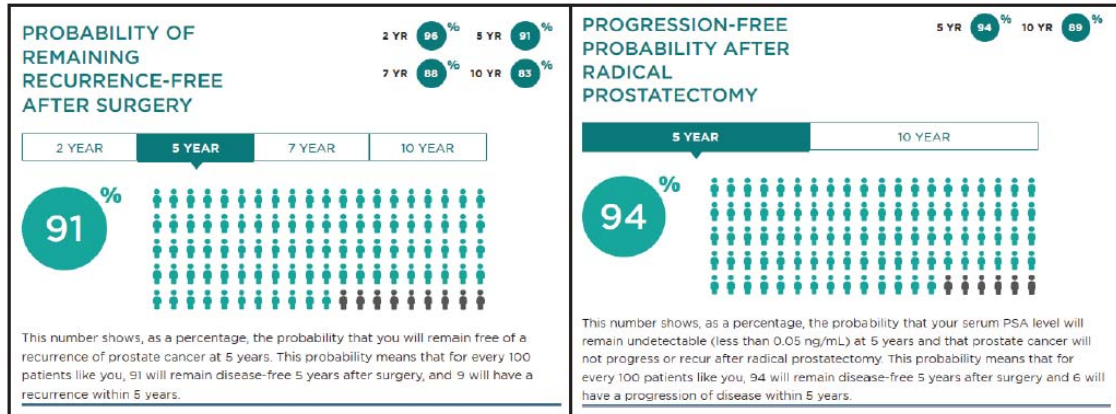

**Figure 1. Memorial Sloan Kettering prostate cancer risk nomogram.**

Patient details input to <https://www.mskcc.org/nomograms/prostate> for both pre-operative and post-operative outcomes.

On integrated genomic analysis, this man was found to be in iCluster3, our highest risk subgroup. So, although his clinical data suggested he was at low risk of relapse he is actually, according to our data, between 30 and 78% likely to relapse. In the event, this man had adjuvant / early salvage radiotherapy at 7 months and this seems to have been effective as his PSA has remained steady since (Figure 2) suggesting that his relapse was due to recurrence from unidentified locally advanced disease (local equivalent of micrometastatic disease). We propose that genomic information contained within this study could be used at the time of biopsy to advocate surgery with wider margins, or after prostatectomy to advocate early adjuvant radiotherapy or even neoadjuvant treatment with an appropriate small molecule.

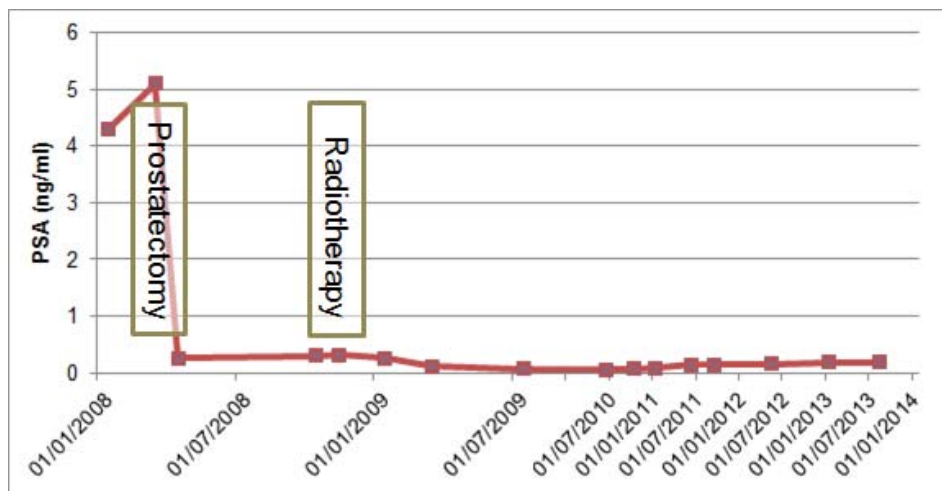

**Figure 2. PSA kinetics from diagnosis to most recent recorded follow up.**

In addition to signature profiling another area in which this information could be used is in immunohistochemistry of biopsy or prostatectomy specimens. In order to help investigate this we generated a tissue microarray (TMA) containing tumour cores for every man in the Cambridge cohort undergoing prostatectomy. These specimens were taken from regions of the prostate paraffin megablock directly adjacent to the frozen section from which nucleic acids were extracted. A representative H&E stain of one of the four TMA blocks is shown (Figure 3A) as well as of the man

described here. A core demonstrating his prostate cancer is presented (Figure 3B) as well as our first attempt at staining for a protein coded by a member of the 100-gene set presented in this study, MELK. This staining needs optimising and it is hoped that further antibody selection for genes discriminating the high-risk subgroups will yield clinically useful diagnostic information.

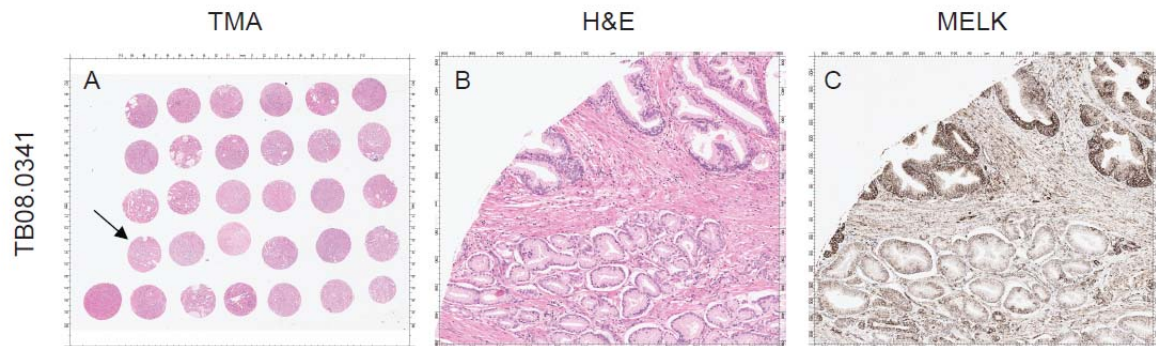

**Figure 3. Histology from CamCaP robotic prostatectomy TMA**

**A.** Screenshot of relevant block of TMA (one of four blocks). Each 3mm core is taken from a section of megablock neighbouring the region from which nucleic acids were extracted for integrated analysis. Arrow indicates the man in this case example.

**B.** Haematoxylin & Eosin stain at 10x magnification of region of infiltrating cancer. Scale as shown.

**C.** MELK immunohistochemistry (IHC, Sigma Atlas #HPA017214). MELK is one of the 100-gene set of discriminating genes. Staining is poor here. Further work-up of relevant antibodies is needed to identify members of the gene-set that are accurate in identifying members of high-risk subgroups before an IHC/histological approach could be used.

Supplementary Table 1. Available prostate cancer datasets with both mRNA and copy number data

| Dataset                         | Platform<br>Gene expression            | Platform<br>CN                             | # primary<br>tumours | # advanced<br>tumours |
|---------------------------------|----------------------------------------|--------------------------------------------|----------------------|-----------------------|
| Varambally <i>et al.</i> (2005) | Affymetrix U133 2.0                    | N/A                                        | 7                    | 6                     |
| Tomlins <i>et al.</i> (2005)    | not reported                           | N/A                                        | 22                   | 9                     |
| Taylor <i>et al.</i> (2010)     | Affymetrix Human<br>Exon 1.0 ST        | Agilent 244K                               | <b>109</b>           | <b>19</b>             |
| Markert <i>et al.</i> (2011)    | Illumina Custom<br>Array (6,144 genes) | N/A                                        | 281                  |                       |
| Barbieri <i>et al.</i> (2012)   | Illumina RNA-seq                       | Affymetrix SNP6                            | 112<br>(CN)          | -                     |
|                                 |                                        |                                            | 22<br>(mRNA & CN)    |                       |
| Grasso <i>et al.</i> (2012)     | Exome-seq (Illumina<br>GAIIx)          | Agilent 105K or 244K                       | 59                   | 32                    |
| Baca <i>et al.</i> (2013)*      | Exome-seq (Illumina<br>GAIIx)          | WGS (Illumina GAIIx)<br>& Affymetrix SNP 6 | 55                   | 2                     |
| TCGA - provisional‡             | Illumina RNA-seq                       | Affymetrix SNP6                            | 171                  | -                     |

\* data not available

‡ data only available after analysis completed

Supplementary Table 3. Frequencies of copy number variations (CNVs) in known prostate cancer risk genes in discovery and validation cohorts

| genes tagging region* | chr  | % other primary PC cohorts* | % Cambridge discovery cohort | % Stockholm validation cohort |
|-----------------------|------|-----------------------------|------------------------------|-------------------------------|
| NKX3-1                | 8p   | 55.7%                       | 39.6%                        | 44.7%                         |
| RB1                   | 13q  | 44.9%                       | 23.6%                        | 42.7%                         |
| RYBP                  | 3p13 | 19.8%                       | 19.8%                        | 32.0%                         |
| PTEN                  | 10q  | 26.4%                       | 17.9%                        | 37.9%                         |
| CDKN1B                | 12p  | 23.8%                       | 17.0%                        | 29.1%                         |
| SHQ1                  | 3p13 | 19.8%                       | 15.1%                        | 30.1%                         |
| MAP3K7                | 6q   | 40.8%                       | 15.1%                        | 45.6%                         |
| FOXP1                 | 3p13 | 19.8%                       | 15.1%                        | 29.1%                         |
| MYC                   | 8q24 | 20.9%                       | 13.2%                        | 36.9%                         |
| TP53                  | 17p  | 28.4%                       | 11.3%                        | 32.0%                         |
| BRCA2                 | 13q  | 44.9%                       | 9.4%                         | 32.0%                         |
| BCL2                  | 18q  | 25.5%                       | 7.5%                         | 35.9%                         |
| MCM7                  | 7p   | 14.1%                       | 7.5%                         | 33.0%                         |
| CDH1                  | 16q  | 44.3%                       | 7.5%                         | 31.1%                         |
| CHD1                  | 5q   | 35.9%                       | 6.6%                         | 37.9%                         |
| APC                   | 5q   | 35.9%                       | 6.6%                         | 36.9%                         |
| ETV4                  | 17q  | 17.4%                       | 6.6%                         | 30.1%                         |
| ETV5                  | 3q   | 9.7%                        | 6.6%                         | 29.1%                         |
| SMAD4                 | 18q  | 25.5%                       | 5.7%                         | 35.9%                         |
| CXCR4                 | 2q   | 22.9%                       | 4.7%                         | 37.9%                         |
| EGFR                  | 7p   | 14.1%                       | 4.7%                         | 31.1%                         |
| PIK3CA                | 3q   | 9.7%                        | 4.7%                         | 30.1%                         |
| BRCA1                 | 17q  | 17.4%                       | 3.8%                         | 27.2%                         |
| BRAF                  | 7p   | 14.1%                       | 3.8%                         | 31.1%                         |
| ERG                   | 21q  | 25.2%                       | 2.8%                         | 15.5%                         |
| ETV1                  | 7p   | 14.1%                       | 1.9%                         | 32.0%                         |
| TMPRSS2               | 21q  | 25.1%                       | 0.0%                         | 19.4%                         |

\* From Williams et al. (2014) meta-analysis of recurrent CNVs in PC

Cambridge cohort OMNI2.5M data were analysed in OncoSNP (Yau et al., 2010); all rank calls 1-5 counted  
Stockholm SNP6 data were analysed in ASCAT (van Loo et al., 2010); no filtering on calls

Supplementary Table 4. All genes with CN altered in  $\geq 10\%$  Cambridge samples tested (OMNI2.5M; Onc

| chr  | chrStart | chrEnd   | gene         | strand | CNA type |
|------|----------|----------|--------------|--------|----------|
| chr8 | 47752507 | 47767407 | LINC00293    | +      | gain     |
| chr8 | 48100929 | 48104439 | LOC100287846 | +      | gain     |
| chr8 | 48173488 | 48678652 | SPIDR        | +      | gain     |
| chr8 | 48872762 | 48890719 | MCM4         | +      | gain     |
| chr8 | 48920994 | 48974454 | UBE2V2       | +      | gain     |
| chr8 | 49966894 | 49988642 | C8orf22      | +      | gain     |
| chr8 | 50822348 | 51705427 | SNTG1        | +      | gain     |
| chr8 | 53852467 | 53853454 | NPBWR1       | +      | gain     |
| chr8 | 54764367 | 54871863 | RGS20        | +      | gain     |
| chr8 | 55047780 | 55061074 | MRPL15       | +      | gain     |
| chr8 | 55370494 | 55373456 | SOX17        | +      | gain     |
| chr8 | 55528626 | 55682531 | RP1          | +      | gain     |
| chr8 | 56015016 | 56438710 | XKR4         | +      | gain     |
| chr8 | 56685790 | 56738005 | TGS1         | +      | gain     |
| chr8 | 56792385 | 56925006 | LYN          | +      | gain     |
| chr8 | 57124314 | 57131176 | CHCHD7       | +      | gain     |
| chr8 | 58131647 | 58145388 | LOC100507651 | +      | gain     |
| chr8 | 58173784 | 58179170 | LOC286177    | +      | gain     |
| chr8 | 58192101 | 58197290 | LINC00588    | +      | gain     |
| chr8 | 58907112 | 59062277 | FAM110B      | +      | gain     |
| chr8 | 59323822 | 59364060 | UBXN2B       | +      | gain     |
| chr8 | 59465727 | 59495419 | SDCBP        | +      | gain     |
| chr8 | 61429468 | 61536203 | RAB2A        | +      | gain     |
| chr8 | 61591323 | 61780586 | CHD7         | +      | gain     |
| chr8 | 62200524 | 62414204 | CLVS1        | +      | gain     |
| chr8 | 62627346 | 62627418 | MIR4470      | +      | gain     |
| chr8 | 63161500 | 63903628 | NKAIN3       | +      | gain     |
| chr8 | 63890419 | 63897460 | UG0898H09    | +      | gain     |
| chr8 | 64081111 | 64125346 | YTHDF3       | +      | gain     |
| chr8 | 64681987 | 64698054 | LINC01289    | +      | gain     |
| chr8 | 65285774 | 65295842 | MIR124-2HG   | +      | gain     |
| chr8 | 65291705 | 65291814 | MIR124-2     | +      | gain     |
| chr8 | 65492794 | 65496191 | BHLHE22      | +      | gain     |
| chr8 | 66556887 | 66622798 | MTFR1        | +      | gain     |
| chr8 | 66933790 | 67012755 | DNAJC5B      | +      | gain     |
| chr8 | 67039277 | 67087718 | TRIM55       | +      | gain     |
| chr8 | 67104348 | 67109554 | LINC00967    | +      | gain     |
| chr8 | 67341262 | 67342968 | RRS1         | +      | gain     |
| chr8 | 67344717 | 67381044 | ADHFE1       | +      | gain     |
| chr8 | 67405490 | 67430759 | C8orf46      | +      | gain     |
| chr8 | 67579786 | 67593377 | C8orf44      | +      | gain     |
| chr8 | 67579786 | 67774257 | C8orf44-SGK3 | +      | gain     |
| chr8 | 67624652 | 67774257 | SGK3         | +      | gain     |
| chr8 | 67782983 | 67834283 | MCMD2        | +      | gain     |
| chr8 | 67976602 | 68108849 | CSPP1        | +      | gain     |
| chr8 | 68864602 | 69143897 | PREX2        | +      | gain     |
| chr8 | 69242956 | 69731258 | C8orf34      | +      | gain     |
| chr8 | 70378858 | 70573147 | SULF1        | +      | gain     |

|      |          |          |              |   |      |
|------|----------|----------|--------------|---|------|
| chr8 | 71520811 | 71575513 | LOC286190    | + | gain |
| chr8 | 71581599 | 71648177 | XKR9         | + | gain |
| chr8 | 72755357 | 72968547 | LOC100132891 | + | gain |
| chr8 | 73449625 | 73850584 | KCNB2        | + | gain |
| chr8 | 73921096 | 73959987 | TERF1        | + | gain |
| chr8 | 74206836 | 74237520 | RDH10        | + | gain |
| chr8 | 74332308 | 74353753 | STAU2-AS1    | + | gain |
| chr8 | 74888376 | 74895018 | TMEM70       | + | gain |
| chr8 | 74903563 | 74941307 | LY96         | + | gain |
| chr8 | 75262617 | 75279335 | GDAP1        | + | gain |
| chr8 | 75460777 | 75460852 | MIR5681A     | + | gain |
| chr8 | 75512100 | 75670587 | FLJ39080     | + | gain |
| chr8 | 75617927 | 75617982 | MIR2052      | + | gain |
| chr8 | 75736771 | 75767264 | PI15         | + | gain |
| chr8 | 75896707 | 75946793 | CRISPLD1     | + | gain |
| chr8 | 76320182 | 76479061 | HNF4G        | + | gain |
| chr8 | 77593514 | 77779521 | ZFHX4        | + | gain |
| chr8 | 79428335 | 79517502 | PKIA         | + | gain |
| chr8 | 79578281 | 79631997 | ZC2HC1A      | + | gain |
| chr8 | 80523048 | 80578410 | STMN2        | + | gain |
| chr8 | 81153623 | 81153708 | MIR5708      | + | gain |
| chr8 | 81397853 | 81438500 | ZBTB10       | + | gain |
| chr8 | 82192717 | 82197012 | FABP5        | + | gain |
| chr8 | 82644687 | 82671748 | CHMP4C       | + | gain |
| chr8 | 85095452 | 85834078 | RALYL        | + | gain |
| chr8 | 86019322 | 86058314 | LRRCC1       | + | gain |
| chr8 | 86089618 | 86126753 | E2F5         | + | gain |
| chr8 | 86132844 | 86352138 | CA13         | + | gain |
| chr8 | 86351055 | 86361267 | CA3          | + | gain |
| chr8 | 86376130 | 86393721 | CA2          | + | gain |
| chr8 | 87111138 | 87166454 | ATP6VOD2     | + | gain |
| chr8 | 87354993 | 87480178 | WWP1         | + | gain |
| chr8 | 87526655 | 87573726 | CPNE3        | + | gain |
| chr8 | 87878675 | 88394955 | CNBD1        | + | gain |
| chr8 | 90769974 | 90803292 | RIPK2        | + | gain |
| chr8 | 90914095 | 90940095 | OSGIN2       | + | gain |
| chr8 | 91013579 | 91064227 | DECR1        | + | gain |
| chr8 | 91233715 | 91400187 | LINC00534    | + | gain |
| chr8 | 91803920 | 91971630 | NECAB1       | + | gain |
| chr8 | 92082423 | 92099323 | OTUD6B       | + | gain |
| chr8 | 92114846 | 92231464 | LRRC69       | + | gain |
| chr8 | 92217712 | 92217786 | MIR4661      | + | gain |
| chr8 | 92221721 | 92410378 | SLC26A7      | + | gain |
| chr8 | 94712772 | 94740671 | FAM92A1      | + | gain |
| chr8 | 94752338 | 94753047 | RBM12B-AS1   | + | gain |
| chr8 | 94767071 | 94830347 | TMEM67       | + | gain |
| chr8 | 94929082 | 94938296 | PDP1         | + | gain |
| chr8 | 95653363 | 95719694 | ESRP1        | + | gain |
| chr8 | 95732102 | 95806076 | DPY19L4      | + | gain |
| chr8 | 95835517 | 95892721 | INTS8        | + | gain |

|      |           |           |             |   |      |
|------|-----------|-----------|-------------|---|------|
| chr8 | 95970235  | 96088396  | NDUFAF6     | + | gain |
| chr8 | 96085141  | 96085221  | MIR3150A    | + | gain |
| chr8 | 96145948  | 96168913  | PLEKHF2     | + | gain |
| chr8 | 96281063  | 96822371  | C8orf37-AS1 | + | gain |
| chr8 | 97274166  | 97346774  | PTDSS1      | + | gain |
| chr8 | 97505881  | 97624037  | SDC2        | + | gain |
| chr8 | 97657498  | 98155722  | CPQ         | + | gain |
| chr8 | 98656406  | 98742488  | MTDH        | + | gain |
| chr8 | 98787808  | 98864830  | LAPTM4B     | + | gain |
| chr8 | 98881310  | 99048946  | MATN2       | + | gain |
| chr8 | 99076749  | 99105838  | ERICH5      | + | gain |
| chr8 | 99129520  | 99172069  | POP1        | + | gain |
| chr8 | 99439249  | 99443023  | KCNS2       | + | gain |
| chr8 | 99956630  | 99964326  | OSR2        | + | gain |
| chr8 | 100025493 | 100889814 | VPS13B      | + | gain |
| chr8 | 101162838 | 101166230 | POLR2K      | + | gain |
| chr8 | 101170262 | 101254132 | SPAG1       | + | gain |
| chr8 | 101394990 | 101395073 | MIR4471     | + | gain |
| chr8 | 102064281 | 102088479 | FLJ42969    | + | gain |
| chr8 | 102381120 | 102381823 | NACAP1      | + | gain |
| chr8 | 102504667 | 102681952 | GRHL2       | + | gain |
| chr8 | 103137659 | 103137743 | MIR5680     | + | gain |
| chr8 | 103563847 | 103573245 | ODF1        | + | gain |
| chr8 | 104033247 | 104085285 | ATP6V1C1    | + | gain |
| chr8 | 104152920 | 104242533 | BAALC       | + | gain |
| chr8 | 104166841 | 104166917 | MIR3151     | + | gain |
| chr8 | 104310660 | 104345094 | FZD6        | + | gain |
| chr8 | 104383742 | 104395232 | CTHRC1      | + | gain |
| chr8 | 104426941 | 104455680 | DCAF13      | + | gain |
| chr8 | 104512975 | 105266656 | RIMS2       | + | gain |
| chr8 | 105352023 | 105368917 | DCSTAMP     | + | gain |
| chr8 | 106331146 | 106816767 | ZFPM2       | + | gain |
| chr8 | 107282405 | 107764921 | OXR1        | + | gain |
| chr8 | 109455852 | 109499136 | EMC2        | + | gain |
| chr8 | 110099652 | 110131812 | TRHR        | + | gain |
| chr8 | 110346551 | 110358189 | ENY2        | + | gain |
| chr8 | 110374705 | 110543500 | PKHD1L1     | + | gain |
| chr8 | 110551928 | 110577391 | EBAG9       | + | gain |
| chr8 | 113655721 | 113655812 | MIR2053     | + | gain |
| chr8 | 117778741 | 117786921 | UTP23       | + | gain |
| chr8 | 117886662 | 117889107 | RAD21-AS1   | + | gain |
| chr8 | 117950463 | 117956239 | AARD        | + | gain |
| chr8 | 117962511 | 118188953 | SLC30A8     | + | gain |
| chr8 | 118532964 | 118552501 | MED30       | + | gain |
| chr8 | 119633239 | 119738306 | SAMD12-AS1  | + | gain |
| chr8 | 120079423 | 120119202 | COLEC10     | + | gain |
| chr8 | 120220609 | 120257914 | MAL2        | + | gain |
| chr8 | 120428551 | 120436678 | NOV         | + | gain |
| chr8 | 120885899 | 121063157 | DEPTOR      | + | gain |
| chr8 | 121137346 | 121384273 | COL14A1     | + | gain |



|      |           |           |           |   |      |
|------|-----------|-----------|-----------|---|------|
| chr8 | 121457637 | 121535875 | MTBP      | + | gain |
| chr8 | 122651585 | 122657564 | HAS2-AS1  | + | gain |
| chr8 | 123793900 | 123986755 | ZHX2      | + | gain |
| chr8 | 124084919 | 124164392 | TBC1D31   | + | gain |
| chr8 | 124191286 | 124222318 | FAM83A    | + | gain |
| chr8 | 124428964 | 124454260 | WDYHV1    | + | gain |
| chr8 | 124780881 | 124827690 | FAM91A1   | + | gain |
| chr8 | 124864226 | 125132302 | FER1L6    | + | gain |
| chr8 | 125463047 | 125465266 | TRMT12    | + | gain |
| chr8 | 125487007 | 125500859 | RNF139    | + | gain |
| chr8 | 125551342 | 125580751 | NDUFB9    | + | gain |
| chr8 | 125951883 | 125963337 | LINC00964 | + | gain |
| chr8 | 125985538 | 125991630 | ZNF572    | + | gain |
| chr8 | 126010719 | 126034525 | SQLE      | + | gain |
| chr8 | 126104082 | 126379367 | NSMCE2    | + | gain |
| chr8 | 126442562 | 126450644 | TRIB1     | + | gain |
| chr8 | 128025398 | 128033259 | PCAT1     | + | gain |
| chr8 | 128427856 | 128429441 | POU5F1B   | + | gain |
| chr8 | 128747764 | 128753680 | MYC       | + | gain |
| chr8 | 128806802 | 129113499 | PVT1      | + | gain |
| chr8 | 128808207 | 128808274 | MIR1204   | + | gain |
| chr8 | 128972878 | 128972941 | MIR1205   | + | gain |
| chr8 | 129021143 | 129021202 | MIR1206   | + | gain |
| chr8 | 129061397 | 129061484 | MIR1207   | + | gain |
| chr8 | 129162361 | 129162434 | MIR1208   | + | gain |
| chr8 | 132916355 | 133025886 | EFR3A     | + | gain |
| chr8 | 133787603 | 133861052 | PHF20L1   | + | gain |
| chr8 | 133879204 | 134147143 | TG        | + | gain |
| chr8 | 134203281 | 134243932 | WISP1     | + | gain |
| chr8 | 135610313 | 135612932 | ZFAT-AS1  | + | gain |
| chr8 | 136246373 | 136311962 | LOC286094 | + | gain |
| chr8 | 136469715 | 136659848 | KHDRBS3   | + | gain |
| chr8 | 141521396 | 141527252 | CHRA1     | + | gain |
| chr8 | 142138719 | 142205906 | DENND3    | + | gain |
| chr8 | 142350647 | 142354720 | LINC01300 | + | gain |
| chr8 | 142432006 | 142441620 | PTP4A3    | + | gain |
| chr8 | 143257699 | 143257779 | MIR4472-1 | + | gain |
| chr8 | 143279716 | 143290364 | LINC00051 | + | gain |
| chr8 | 143545376 | 143626368 | BAI1      | + | gain |
| chr8 | 143751725 | 143764145 | PSCA      | + | gain |
| chr8 | 143781528 | 143785584 | LY6K      | + | gain |
| chr8 | 143808620 | 143818350 | THEM6     | + | gain |
| chr8 | 143916216 | 143928262 | GML       | + | gain |
| chr8 | 144077244 | 144079080 | CDC42P3   | + | gain |
| chr8 | 144099901 | 144103827 | LY6E      | + | gain |
| chr8 | 144120678 | 144135720 | C8orf31   | + | gain |
| chr8 | 144295067 | 144299044 | GPIHBP1   | + | gain |
| chr8 | 144328990 | 144359101 | ZFP41     | + | gain |
| chr8 | 144349606 | 144359101 | GLI4      | + | gain |
| chr8 | 144373558 | 144382120 | ZNF696    | + | gain |

|      |           |           |             |   |      |
|------|-----------|-----------|-------------|---|------|
| chr8 | 144451024 | 144466390 | RHPN1       | + | gain |
| chr8 | 144635556 | 144645231 | GSDMD       | + | gain |
| chr8 | 144680073 | 144682485 | TIGD5       | + | gain |
| chr8 | 144718182 | 144735900 | ZNF623      | + | gain |
| chr8 | 144766621 | 144794977 | ZNF707      | + | gain |
| chr8 | 144779284 | 144780583 | BREA2       | + | gain |
| chr8 | 144798506 | 144804633 | MAPK15      | + | gain |
| chr8 | 144816309 | 144828507 | FAM83H-AS1  | + | gain |
| chr8 | 145064225 | 145067583 | GRINA       | + | gain |
| chr8 | 145086581 | 145102015 | SPATC1      | + | gain |
| chr8 | 145133521 | 145135551 | EXOSC4      | + | gain |
| chr8 | 145137523 | 145141119 | GPAA1       | + | gain |
| chr8 | 145149941 | 145152428 | CYC1        | + | gain |
| chr8 | 145159304 | 145162515 | MAF1        | + | gain |
| chr8 | 145162628 | 145173218 | KIAA1875    | + | gain |
| chr8 | 145192671 | 145440828 | HGH1        | + | gain |
| chr8 | 145202918 | 145316843 | MROH1       | + | gain |
| chr8 | 145321516 | 145492131 | SCX         | + | gain |
| chr8 | 145515269 | 145538385 | HSF1        | + | gain |
| chr8 | 145582216 | 145584948 | SLC52A2     | + | gain |
| chr8 | 145597730 | 145618453 | ADCK5       | + | gain |
| chr8 | 145691737 | 145699499 | KIFC2       | + | gain |
| chr8 | 145715416 | 145727504 | PPP1R16A    | + | gain |
| chr8 | 145729464 | 145732555 | GPT         | + | gain |
| chr8 | 145734551 | 145736589 | MFSD3       | + | gain |
| chr8 | 145743348 | 145750559 | LRRC14      | + | gain |
| chr8 | 146024260 | 146036554 | ZNF517      | + | gain |
| chr8 | 146052902 | 146072894 | ZNF7        | + | gain |
| chr8 | 146220250 | 146224283 | TMED10P1    | + | gain |
| chr8 | 146228196 | 146231432 | ZNF252P-AS1 | + | gain |
| chr8 | 146277823 | 146281416 | C8orf33     | + | gain |
| chr8 | 48649475  | 48650726  | CEBPD       | - | gain |
| chr8 | 48685668  | 48872743  | PRKDC       | - | gain |
| chr8 | 49623350  | 49647870  | EFCAB1      | - | gain |
| chr8 | 49830238  | 49833999  | SNAI2       | - | gain |
| chr8 | 52232136  | 52722005  | PXDNL       | - | gain |
| chr8 | 52730139  | 52811735  | PCMTD1      | - | gain |
| chr8 | 53023391  | 53322439  | ST18        | - | gain |
| chr8 | 53446596  | 53478021  | FAM150A     | - | gain |
| chr8 | 53535017  | 53627026  | RB1CC1      | - | gain |
| chr8 | 54138275  | 54164194  | OPRK1       | - | gain |
| chr8 | 54628102  | 54755871  | ATP6V1H     | - | gain |
| chr8 | 54879115  | 54935008  | TCEA1       | - | gain |
| chr8 | 54958937  | 55014577  | LYPLA1      | - | gain |
| chr8 | 56361756  | 56367881  | SBF1P1      | - | gain |
| chr8 | 56651319  | 56685885  | TMEM68      | - | gain |
| chr8 | 56980738  | 56987140  | RPS20       | - | gain |
| chr8 | 56986397  | 56986460  | SNORD54     | - | gain |
| chr8 | 57025500  | 57026541  | MOS         | - | gain |
| chr8 | 57073467  | 57123859  | PLAG1       | - | gain |

|      |          |          |              |   |      |
|------|----------|----------|--------------|---|------|
| chr8 | 57212569 | 57233241 | SDR16C5      | - | gain |
| chr8 | 57353512 | 57359282 | PENK         | - | gain |
| chr8 | 57430877 | 57472382 | LINC00968    | - | gain |
| chr8 | 57870487 | 57906430 | IMPAD1       | - | gain |
| chr8 | 59402736 | 59412720 | CYP7A1       | - | gain |
| chr8 | 59496063 | 59572404 | NSMAF        | - | gain |
| chr8 | 59717976 | 60031767 | TOX          | - | gain |
| chr8 | 61101422 | 61193954 | CA8          | - | gain |
| chr8 | 61878679 | 61880307 | LOC100130298 | - | gain |
| chr8 | 62413114 | 62627199 | ASPH         | - | gain |
| chr8 | 63927638 | 63951610 | GGH          | - | gain |
| chr8 | 63972047 | 63998612 | TTPA         | - | gain |
| chr8 | 64080283 | 64081001 | YTHDF3-AS1   | - | gain |
| chr8 | 65486865 | 65494445 | LOC401463    | - | gain |
| chr8 | 65508528 | 65711348 | CYP7B1       | - | gain |
| chr8 | 66073379 | 66092575 | LINC00251    | - | gain |
| chr8 | 66439242 | 66474901 | LINC01299    | - | gain |
| chr8 | 66514690 | 66546452 | ARMC1        | - | gain |
| chr8 | 66626568 | 66753969 | PDE7A        | - | gain |
| chr8 | 67088611 | 67090846 | CRH          | - | gain |
| chr8 | 67331821 | 67341212 | RRS1-AS1     | - | gain |
| chr8 | 67474409 | 67525480 | MYBL1        | - | gain |
| chr8 | 67542487 | 67579452 | VCPIP1       | - | gain |
| chr8 | 67679631 | 67680240 | PTTG3P       | - | gain |
| chr8 | 67834164 | 67837777 | SNHG6        | - | gain |
| chr8 | 67834708 | 67834784 | SNORD87      | - | gain |
| chr8 | 67858735 | 67874825 | TCF24        | - | gain |
| chr8 | 67900366 | 67940786 | PPP1R42      | - | gain |
| chr8 | 67955314 | 67974571 | COPS5        | - | gain |
| chr8 | 68085746 | 68255912 | ARFGEF1      | - | gain |
| chr8 | 68334404 | 68658620 | CPA6         | - | gain |
| chr8 | 69215702 | 69243726 | LOC286189    | - | gain |
| chr8 | 69824037 | 70016425 | LOC100505718 | - | gain |
| chr8 | 70584567 | 70747299 | SLCO5A1      | - | gain |
| chr8 | 70963885 | 70983562 | PRDM14       | - | gain |
| chr8 | 71024266 | 71316020 | NCOA2        | - | gain |
| chr8 | 71485452 | 71520694 | TRAM1        | - | gain |
| chr8 | 71549500 | 71581447 | LACTB2       | - | gain |
| chr8 | 72109667 | 72274467 | EYA1         | - | gain |
| chr8 | 72753776 | 72756731 | MSC          | - | gain |
| chr8 | 72933485 | 72987819 | TRPA1        | - | gain |
| chr8 | 73117533 | 73163869 | LOC392232    | - | gain |
| chr8 | 73976777 | 74005507 | SBSPON       | - | gain |
| chr8 | 74153658 | 74171737 | LOC100130301 | - | gain |
| chr8 | 74202873 | 74205869 | RPL7         | - | gain |
| chr8 | 74332603 | 74659943 | STAU2        | - | gain |
| chr8 | 74692331 | 74791145 | UBE2W        | - | gain |
| chr8 | 74857372 | 74884522 | TCEB1        | - | gain |
| chr8 | 75146938 | 75233562 | JPH1         | - | gain |
| chr8 | 75460784 | 75460844 | MIR5681B     | - | gain |

|      |          |          |              |   |      |
|------|----------|----------|--------------|---|------|
| chr8 | 77523113 | 77595510 | ZFHX4-AS1    | - | gain |
| chr8 | 77892493 | 77913280 | PEX2         | - | gain |
| chr8 | 79635082 | 79636609 | LOC101241902 | - | gain |
| chr8 | 79645006 | 79717758 | IL7          | - | gain |
| chr8 | 80676244 | 80680098 | HEY1         | - | gain |
| chr8 | 80831094 | 80942506 | MRPS28       | - | gain |
| chr8 | 80831094 | 81083836 | TPD52        | - | gain |
| chr8 | 81540685 | 81787016 | ZNF704       | - | gain |
| chr8 | 81880045 | 82024303 | PAG1         | - | gain |
| chr8 | 82352563 | 82359719 | PMP2         | - | gain |
| chr8 | 82370617 | 82373758 | FABP9        | - | gain |
| chr8 | 82390731 | 82395473 | FABP4        | - | gain |
| chr8 | 82437280 | 82443550 | FABP12       | - | gain |
| chr8 | 82569150 | 82598589 | IMPA1        | - | gain |
| chr8 | 82605890 | 82607207 | SLC10A5      | - | gain |
| chr8 | 82613565 | 82633539 | ZFAND1       | - | gain |
| chr8 | 82711817 | 82754521 | SNX16        | - | gain |
| chr8 | 86126287 | 86132643 | C8orf59      | - | gain |
| chr8 | 86240457 | 86290342 | CA1          | - | gain |
| chr8 | 86566827 | 86757761 | REXO1L2P     | - | gain |
| chr8 | 86568694 | 86840171 | REXO1L1P     | - | gain |
| chr8 | 87060690 | 87081851 | PSKH2        | - | gain |
| chr8 | 87226287 | 87242609 | SLC7A13      | - | gain |
| chr8 | 87484577 | 87521009 | RMDN1        | - | gain |
| chr8 | 87586162 | 87755903 | CNGB3        | - | gain |
| chr8 | 88882970 | 88886296 | DCAF4L2      | - | gain |
| chr8 | 89049459 | 89339717 | MMP16        | - | gain |
| chr8 | 90945563 | 90996899 | NBN          | - | gain |
| chr8 | 91070837 | 91107687 | CALB1        | - | gain |
| chr8 | 91634222 | 91803859 | TMEM64       | - | gain |
| chr8 | 91970705 | 91997485 | C8orf88      | - | gain |
| chr8 | 92006501 | 92053203 | TMEM55A      | - | gain |
| chr8 | 92967194 | 93115454 | RUNX1T1      | - | gain |
| chr8 | 93725189 | 93798288 | FLJ46284     | - | gain |
| chr8 | 93895757 | 94029901 | TRIQQ        | - | gain |
| chr8 | 94146323 | 94179079 | C8orf87      | - | gain |
| chr8 | 94358694 | 94712661 | LINC00535    | - | gain |
| chr8 | 94743730 | 94753224 | RBM12B       | - | gain |
| chr8 | 94928249 | 94928347 | MIR378D2     | - | gain |
| chr8 | 95139393 | 95229531 | CDH17        | - | gain |
| chr8 | 95261484 | 95274547 | GEM          | - | gain |
| chr8 | 95384187 | 95487343 | RAD54B       | - | gain |
| chr8 | 95439939 | 95449180 | FSBP         | - | gain |
| chr8 | 95500004 | 95565746 | KIAA1429     | - | gain |
| chr8 | 95649512 | 95651695 | LOC100288748 | - | gain |
| chr8 | 95892452 | 95907482 | CCNE2        | - | gain |
| chr8 | 95938199 | 95961615 | TP53INP1     | - | gain |
| chr8 | 96085138 | 96085224 | MIR3150B     | - | gain |
| chr8 | 96219234 | 96228602 | LINC01298    | - | gain |
| chr8 | 96257140 | 96281462 | C8orf37      | - | gain |

|      |           |           |              |   |      |
|------|-----------|-----------|--------------|---|------|
| chr8 | 96959212  | 96960576  | LOC100500773 | - | gain |
| chr8 | 97154557  | 97173020  | GDF6         | - | gain |
| chr8 | 97238903  | 97247862  | UQCRB        | - | gain |
| chr8 | 97251644  | 97273796  | MTERF3       | - | gain |
| chr8 | 98285713  | 98290176  | TSPYL5       | - | gain |
| chr8 | 99037078  | 99057818  | RPL30        | - | gain |
| chr8 | 99054313  | 99054445  | SNORA72      | - | gain |
| chr8 | 99114566  | 99129418  | HRSP12       | - | gain |
| chr8 | 99204386  | 99306621  | NIPAL2       | - | gain |
| chr8 | 99466858  | 99954799  | STK3         | - | gain |
| chr8 | 100548863 | 100548958 | MIR599       | - | gain |
| chr8 | 100549013 | 100549089 | MIR875       | - | gain |
| chr8 | 100890222 | 100906242 | COX6C        | - | gain |
| chr8 | 100973275 | 101118344 | RGS22        | - | gain |
| chr8 | 101145587 | 101158099 | FBXO43       | - | gain |
| chr8 | 101269287 | 101322379 | RNF19A       | - | gain |
| chr8 | 101521979 | 101572014 | ANKRD46      | - | gain |
| chr8 | 101585111 | 101661893 | SNX31        | - | gain |
| chr8 | 101715143 | 101734315 | PABPC1       | - | gain |
| chr8 | 101930803 | 101965623 | YWHAZ        | - | gain |
| chr8 | 102209265 | 102218292 | ZNF706       | - | gain |
| chr8 | 102698769 | 103137135 | NCALD        | - | gain |
| chr8 | 103216728 | 103251346 | RRM2B        | - | gain |
| chr8 | 103264501 | 103424917 | UBR5         | - | gain |
| chr8 | 103661004 | 103667983 | KLF10        | - | gain |
| chr8 | 103838535 | 103876397 | AZIN1        | - | gain |
| chr8 | 104145190 | 104153570 | BAALCOS      | - | gain |
| chr8 | 104177736 | 104298135 | BAALC-AS1    | - | gain |
| chr8 | 104410865 | 104427563 | SLC25A32     | - | gain |
| chr8 | 105391651 | 105479277 | DPYS         | - | gain |
| chr8 | 105501458 | 105601252 | LRP12        | - | gain |
| chr8 | 107771710 | 107782472 | ABRA         | - | gain |
| chr8 | 108261709 | 108510254 | ANGPT1       | - | gain |
| chr8 | 108911543 | 109095913 | RSPO2        | - | gain |
| chr8 | 109213971 | 109260959 | EIF3E        | - | gain |
| chr8 | 109619078 | 109799770 | TMEM74       | - | gain |
| chr8 | 110253147 | 110346350 | NUDCD1       | - | gain |
| chr8 | 110586404 | 110704020 | SYBU         | - | gain |
| chr8 | 110979232 | 110988076 | KCNV1        | - | gain |
| chr8 | 113235158 | 114449242 | CSMD3        | - | gain |
| chr8 | 116420723 | 116681228 | TRPS1        | - | gain |
| chr8 | 116962735 | 117337297 | LINC00536    | - | gain |
| chr8 | 117657054 | 117778494 | EIF3H        | - | gain |
| chr8 | 117858172 | 117887105 | RAD21        | - | gain |
| chr8 | 117886966 | 117887039 | MIR3610      | - | gain |
| chr8 | 118811601 | 119124058 | EXT1         | - | gain |
| chr8 | 119201694 | 119634234 | SAMD12       | - | gain |
| chr8 | 119935795 | 119964383 | TNFRSF11B    | - | gain |
| chr8 | 120569316 | 120651106 | ENPP2        | - | gain |
| chr8 | 120743013 | 120845074 | TAF2         | - | gain |

|      |           |           |              |   |      |
|------|-----------|-----------|--------------|---|------|
| chr8 | 120846180 | 120868170 | DSCC1        | - | gain |
| chr8 | 121408082 | 121457647 | MRPL13       | - | gain |
| chr8 | 121547984 | 121824309 | SNTB1        | - | gain |
| chr8 | 122625270 | 122653630 | HAS2         | - | gain |
| chr8 | 124025403 | 124054663 | DERL1        | - | gain |
| chr8 | 124213411 | 124214983 | FAM83A-AS1   | - | gain |
| chr8 | 124228027 | 124228103 | MIR4663      | - | gain |
| chr8 | 124232195 | 124253638 | C8orf76      | - | gain |
| chr8 | 124238428 | 124286727 | ZHX1-C8orf76 | - | gain |
| chr8 | 124260689 | 124287781 | ZHX1         | - | gain |
| chr8 | 124332090 | 124428590 | ATAD2        | - | gain |
| chr8 | 124510126 | 124553493 | FBXO32       | - | gain |
| chr8 | 124657914 | 124665190 | KLHL38       | - | gain |
| chr8 | 124693033 | 124749647 | ANXA13       | - | gain |
| chr8 | 124996377 | 125053023 | FER1L6-AS1   | - | gain |
| chr8 | 125323158 | 125384940 | TMEM65       | - | gain |
| chr8 | 125500734 | 125551329 | TATDN1       | - | gain |
| chr8 | 125563027 | 125740730 | MTSS1        | - | gain |
| chr8 | 126036502 | 126104061 | KIAA0196     | - | gain |
| chr8 | 126934766 | 126963441 | LINC00861    | - | gain |
| chr8 | 127564682 | 127570711 | FAM84B       | - | gain |
| chr8 | 128301928 | 128494384 | CASC8        | - | gain |
| chr8 | 130228712 | 130253486 | LINC00977    | - | gain |
| chr8 | 130760441 | 130799134 | GSDMC        | - | gain |
| chr8 | 130851838 | 131028897 | FAM49B       | - | gain |
| chr8 | 131020579 | 131020699 | MIR5194      | - | gain |
| chr8 | 131064350 | 131455906 | ASAP1        | - | gain |
| chr8 | 131094983 | 131097014 | ASAP1-IT2    | - | gain |
| chr8 | 131307600 | 131308779 | ASAP1-IT1    | - | gain |
| chr8 | 131792546 | 132052835 | ADCY8        | - | gain |
| chr8 | 133036466 | 133071627 | OC90         | - | gain |
| chr8 | 133073732 | 133117512 | HHLA1        | - | gain |
| chr8 | 133133104 | 133493004 | KCNQ3        | - | gain |
| chr8 | 133572744 | 133573726 | HPYR1        | - | gain |
| chr8 | 133584200 | 133687863 | LRRC6        | - | gain |
| chr8 | 133722191 | 133772914 | TMEM71       | - | gain |
| chr8 | 134048972 | 134115310 | SLA          | - | gain |
| chr8 | 134249413 | 134309547 | NDRG1        | - | gain |
| chr8 | 134467090 | 134584183 | ST3GAL1      | - | gain |
| chr8 | 135490030 | 135725292 | ZFAT         | - | gain |
| chr8 | 135812762 | 135812850 | MIR30B       | - | gain |
| chr8 | 135817118 | 135817188 | MIR30D       | - | gain |
| chr8 | 139142265 | 139509065 | FAM135B      | - | gain |
| chr8 | 139600477 | 139926236 | COL22A1      | - | gain |
| chr8 | 140613081 | 140715299 | KCNK9        | - | gain |
| chr8 | 140742585 | 141468678 | TRAPPC9      | - | gain |
| chr8 | 141541263 | 141645646 | AGO2         | - | gain |
| chr8 | 141668480 | 142011412 | PTK2         | - | gain |
| chr8 | 142217273 | 142264225 | SLC45A4      | - | gain |
| chr8 | 142366586 | 142377365 | GPR20        | - | gain |

|      |           |           |              |   |      |
|------|-----------|-----------|--------------|---|------|
| chr8 | 142443928 | 142517330 | MROH5        | - | gain |
| chr8 | 143293440 | 143484543 | TSNARE1      | - | gain |
| chr8 | 143692404 | 143695833 | ARC          | - | gain |
| chr8 | 143738873 | 143751401 | JRK          | - | gain |
| chr8 | 143783669 | 143808391 | LOC100288181 | - | gain |
| chr8 | 143822361 | 143823829 | SLURP1       | - | gain |
| chr8 | 143831627 | 143833952 | LYPD2        | - | gain |
| chr8 | 143845755 | 143859640 | LYNX1        | - | gain |
| chr8 | 143866297 | 143868008 | LY6D         | - | gain |
| chr8 | 143953772 | 143961236 | CYP11B1      | - | gain |
| chr8 | 143991974 | 143999259 | CYP11B2      | - | gain |
| chr8 | 144063447 | 144099807 | LOC100133669 | - | gain |
| chr8 | 144239330 | 144242053 | LY6H         | - | gain |
| chr8 | 144391496 | 144442147 | TOP1MT       | - | gain |
| chr8 | 144448792 | 144450805 | RHPN1-AS1    | - | gain |
| chr8 | 144510229 | 144512602 | MAFA         | - | gain |
| chr8 | 144519824 | 144623620 | ZC3H3        | - | gain |
| chr8 | 144648362 | 144654928 | MROH6        | - | gain |
| chr8 | 144656954 | 144660513 | NAPRT        | - | gain |
| chr8 | 144661866 | 144679845 | EEF1D        | - | gain |
| chr8 | 144686082 | 144691784 | PYCRL        | - | gain |
| chr8 | 144694787 | 144699732 | TSTA3        | - | gain |
| chr8 | 144788863 | 144790279 | CCDC166      | - | gain |
| chr8 | 144806102 | 144815914 | FAM83H       | - | gain |
| chr8 | 144815252 | 144815323 | MIR4664      | - | gain |
| chr8 | 144873089 | 144897549 | SCRIB        | - | gain |
| chr8 | 144895126 | 144895212 | MIR937       | - | gain |
| chr8 | 144898513 | 144911556 | PUF60        | - | gain |
| chr8 | 144915754 | 144924200 | NRBP2        | - | gain |
| chr8 | 144939911 | 144947434 | EPPK1        | - | gain |
| chr8 | 144989320 | 145050913 | PLEC         | - | gain |
| chr8 | 145019358 | 145019447 | MIR661       | - | gain |
| chr8 | 145051319 | 145060635 | PARP10       | - | gain |
| chr8 | 145106166 | 145115584 | OPLAH        | - | gain |
| chr8 | 145153535 | 145159140 | SHARPIN      | - | gain |
| chr8 | 145486055 | 145515120 | BOP1         | - | gain |
| chr8 | 145538246 | 145550567 | DGAT1        | - | gain |
| chr8 | 145554453 | 145559943 | SCRT1        | - | gain |
| chr8 | 145576885 | 145579269 | TMEM249      | - | gain |
| chr8 | 145579087 | 145583036 | FBXL6        | - | gain |
| chr8 | 145618445 | 145634733 | CPSF1        | - | gain |
| chr8 | 145619363 | 145619445 | MIR939       | - | gain |
| chr8 | 145625475 | 145625559 | MIR1234      | - | gain |
| chr8 | 145637797 | 145642273 | SLC39A4      | - | gain |
| chr8 | 145648999 | 145653927 | VPS28        | - | gain |
| chr8 | 145654162 | 145669812 | TONSL        | - | gain |
| chr8 | 145675314 | 145691031 | CYHR1        | - | gain |
| chr8 | 145699114 | 145701718 | FOXH1        | - | gain |
| chr8 | 145736666 | 145743210 | RECQL4       | - | gain |
| chr8 | 145747760 | 145752416 | LRRC24       | - | gain |

|      |           |           |           |   |      |
|------|-----------|-----------|-----------|---|------|
| chr8 | 145751602 | 145754458 | C8orf82   | - | gain |
| chr8 | 145754562 | 145911194 | ARHGAP39  | - | gain |
| chr8 | 145946293 | 145980970 | ZNF251    | - | gain |
| chr8 | 145998500 | 146012725 | ZNF34     | - | gain |
| chr8 | 146015153 | 146017805 | RPL8      | - | gain |
| chr8 | 146065828 | 146126846 | COMMD5    | - | gain |
| chr8 | 146102335 | 146126846 | ZNF250    | - | gain |
| chr8 | 146155743 | 146176274 | ZNF16     | - | loss |
| chr8 | 146198974 | 146228285 | ZNF252P   | - | loss |
| chr3 | 71803200  | 71804328  | GPR27     | + | loss |
| chr3 | 72200407  | 72223490  | LINC00870 | + | loss |
| chr3 | 71003864  | 71633140  | FOXP1     | - | loss |
| chr3 | 71591120  | 71591240  | MIR1284   | - | loss |
| chr3 | 71728439  | 71803924  | EIF4E3    | - | loss |
| chr3 | 71820805  | 71834357  | PROK2     | - | loss |
| chr3 | 72423743  | 72495774  | RYBP      | - | loss |
| chr3 | 72798427  | 72897598  | SHQ1      | - | loss |
| chr6 | 80816343  | 81055987  | BCKDHB    | + | loss |
| chr6 | 83072922  | 83077133  | TPBG      | + | loss |
| chr6 | 83777384  | 83881065  | DOPEY1    | + | loss |
| chr6 | 83903031  | 83906256  | RWDD2A    | + | loss |
| chr6 | 84222193  | 84235421  | PRSS35    | + | loss |
| chr6 | 84562984  | 84567234  | RIPPLY2   | + | loss |
| chr6 | 84569369  | 84670146  | CYB5R4    | + | loss |
| chr6 | 84743419  | 84800605  | MRAP2     | + | loss |
| chr6 | 86159301  | 86205509  | NT5E      | + | loss |
| chr6 | 87647023  | 87726397  | HTR1E     | + | loss |
| chr6 | 87862550  | 87973406  | ZNF292    | + | loss |
| chr6 | 88032305  | 88085428  | SMIM8     | + | loss |
| chr6 | 88054570  | 88075181  | C6orf163  | + | loss |
| chr6 | 88091719  | 88109459  | C6orf164  | + | loss |
| chr6 | 88117689  | 88205858  | C6orf165  | + | loss |
| chr6 | 88146443  | 88222057  | SLC35A1   | + | loss |
| chr6 | 88299784  | 88377172  | ORC3      | + | loss |
| chr6 | 88757506  | 88776550  | SPACA1    | + | loss |
| chr6 | 89790428  | 89794879  | PNRC1     | + | loss |
| chr6 | 89855768  | 89875288  | PM20D2    | + | loss |
| chr6 | 90142896  | 90343553  | ANKRD6    | + | loss |
| chr6 | 90539618  | 90584155  | CASP8AP2  | + | loss |
| chr6 | 90604187  | 90605819  | GJA10     | + | loss |
| chr6 | 91022460  | 91022552  | MIR4464   | + | loss |
| chr6 | 92231377  | 92231455  | MIR4643   | + | loss |
| chr6 | 94416800  | 94486199  | TSG1      | + | loss |
| chr6 | 96025372  | 96057328  | MANEA     | + | loss |
| chr6 | 96463844  | 96663488  | FUT9      | + | loss |
| chr6 | 96969701  | 97003151  | UFL1      | + | loss |
| chr6 | 97010423  | 97064512  | FHL5      | + | loss |
| chr6 | 97372495  | 97588630  | KLHL32    | + | loss |
| chr6 | 98472406  | 98472495  | MIR2113   | + | loss |
| chr6 | 99282579  | 99286666  | POU3F2    | + | loss |



|      |           |           |              |   |      |
|------|-----------|-----------|--------------|---|------|
| chr6 | 99968869  | 100033084 | TSTD3        | + | loss |
| chr6 | 100054649 | 100063454 | PRDM13       | + | loss |
| chr6 | 100441913 | 100524295 | MCHR2-AS1    | + | loss |
| chr6 | 101846668 | 102517958 | GRIK2        | + | loss |
| chr6 | 105404922 | 105531207 | LIN28B       | + | loss |
| chr6 | 105585561 | 105617819 | BVES-AS1     | + | loss |
| chr6 | 106534194 | 106557814 | PRDM1        | + | loss |
| chr6 | 106959304 | 107018334 | AIM1         | + | loss |
| chr6 | 107077440 | 107116292 | QRSL1        | + | loss |
| chr6 | 107349406 | 107372547 | C6orf203     | + | loss |
| chr6 | 107811316 | 107982513 | SOBP         | + | loss |
| chr6 | 108487214 | 108510013 | NR2E1        | + | loss |
| chr6 | 108616097 | 108844251 | LACE1        | + | loss |
| chr6 | 108881025 | 109005971 | FOXO3        | + | loss |
| chr6 | 109072856 | 109091145 | LINC00222    | + | loss |
| chr6 | 109169618 | 109295352 | ARMC2        | + | loss |
| chr6 | 109416355 | 109485115 | CEP57L1      | + | loss |
| chr6 | 109557816 | 109591717 | LOC100996634 | + | loss |
| chr6 | 109615505 | 109629423 | CCDC162P     | + | loss |
| chr6 | 109761930 | 109765122 | SMPD2        | + | loss |
| chr6 | 110012423 | 110146634 | FIG4         | + | loss |
| chr6 | 110300297 | 110301924 | GPR6         | + | loss |
| chr6 | 110501586 | 110553422 | CDC40        | + | loss |
| chr6 | 111135823 | 111216913 | AMD1         | + | loss |
| chr6 | 111279762 | 111289091 | GTF3C6       | + | loss |
| chr6 | 111303290 | 111346794 | RPF2         | + | loss |
| chr6 | 111408780 | 111544606 | SLC16A10     | + | loss |
| chr6 | 111580481 | 111590261 | KIAA1919     | + | loss |
| chr6 | 111804674 | 111923497 | TRAF3IP2-AS1 | + | loss |
| chr6 | 112375277 | 112390887 | WISP3        | + | loss |
| chr6 | 112408673 | 112423993 | FAM229B      | + | loss |
| chr6 | 112668531 | 112672498 | RFPL4B       | + | loss |
| chr6 | 114178526 | 114184652 | MARCKS       | + | loss |
| chr6 | 114225550 | 114242806 | FLJ34503     | + | loss |
| chr6 | 116359893 | 116361107 | TPI1P3       | + | loss |
| chr6 | 116421998 | 116566853 | NT5DC1       | + | loss |
| chr6 | 116575335 | 116759442 | DSE          | + | loss |
| chr6 | 116782532 | 116784934 | FAM26F       | + | loss |
| chr6 | 116832807 | 116839709 | FAM26E       | + | loss |
| chr6 | 116850175 | 116880031 | FAM26D       | + | loss |
| chr6 | 116892582 | 116914436 | RWDD1        | + | loss |
| chr6 | 116937641 | 116954148 | RSPH4A       | + | loss |
| chr6 | 117002366 | 117063030 | KPNA5        | + | loss |
| chr6 | 117198375 | 117253326 | RFX6         | + | loss |
| chr6 | 117586720 | 117594728 | VGLL2        | + | loss |
| chr6 | 117803819 | 117891020 | DCBLD1       | + | loss |
| chr6 | 117996616 | 118031886 | NUS1         | + | loss |
| chr6 | 118228688 | 118638839 | SLC35F1      | + | loss |
| chr6 | 118822535 | 118824996 | BRD7P3       | + | loss |
| chr6 | 118869441 | 118881587 | PLN          | + | loss |

|      |           |           |              |   |      |
|------|-----------|-----------|--------------|---|------|
| chr6 | 119103870 | 119104581 | LOC100287632 | + | loss |
| chr6 | 119215240 | 119230335 | ASF1A        | + | loss |
| chr6 | 82455446  | 82462428  | FAM46A       | - | loss |
| chr6 | 82879955  | 82957448  | IBTK         | - | loss |
| chr6 | 83602185  | 83775545  | UBE3D        | - | loss |
| chr6 | 83874592  | 83903655  | PGM3         | - | loss |
| chr6 | 83920109  | 84140938  | ME1          | - | loss |
| chr6 | 84262604  | 84419127  | SNAP91       | - | loss |
| chr6 | 84833959  | 84937335  | CEP162       | - | loss |
| chr6 | 85397078  | 85473954  | TBX18        | - | loss |
| chr6 | 86215214  | 86303629  | SNX14        | - | loss |
| chr6 | 86317501  | 86353043  | SYNCRIP      | - | loss |
| chr6 | 86386724  | 86388451  | SNHG5        | - | loss |
| chr6 | 86387011  | 86387086  | SNORD50A     | - | loss |
| chr6 | 86387306  | 86387377  | SNORD50B     | - | loss |
| chr6 | 87795215  | 87804865  | CGA          | - | loss |
| chr6 | 87992696  | 88038996  | GJB7         | - | loss |
| chr6 | 88224095  | 88299735  | RARS2        | - | loss |
| chr6 | 88384577  | 88411985  | AKIRIN2      | - | loss |
| chr6 | 88849584  | 88875767  | CNR1         | - | loss |
| chr6 | 89319988  | 89673348  | RNGTT        | - | loss |
| chr6 | 89805677  | 89827800  | SRSF12       | - | loss |
| chr6 | 89887222  | 89941007  | GABRR1       | - | loss |
| chr6 | 89966839  | 90025018  | GABRR2       | - | loss |
| chr6 | 90036343  | 90062619  | UBE2J1       | - | loss |
| chr6 | 90074334  | 90121995  | RRAGD        | - | loss |
| chr6 | 90277862  | 90348474  | LYRM2        | - | loss |
| chr6 | 90353230  | 90529442  | MDN1         | - | loss |
| chr6 | 90636246  | 91006627  | BACH2        | - | loss |
| chr6 | 91223291  | 91297020  | MAP3K7       | - | loss |
| chr6 | 93949739  | 94129300  | EPHA7        | - | loss |
| chr6 | 97241997  | 97285353  | GPR63        | - | loss |
| chr6 | 97337186  | 97345767  | NDUFAF4      | - | loss |
| chr6 | 97590036  | 97731061  | MMS22L       | - | loss |
| chr6 | 99321600  | 99395849  | FBXL4        | - | loss |
| chr6 | 99720792  | 99797531  | FAXC         | - | loss |
| chr6 | 99817347  | 99842082  | COQ3         | - | loss |
| chr6 | 99847840  | 99873207  | PNISR        | - | loss |
| chr6 | 99880183  | 99963308  | USP45        | - | loss |
| chr6 | 99990262  | 100016690 | CCNC         | - | loss |
| chr6 | 100367785 | 100442114 | MCHR2        | - | loss |
| chr6 | 100836749 | 100912805 | SIM1         | - | loss |
| chr6 | 100956607 | 101329224 | ASCC3        | - | loss |
| chr6 | 105175967 | 105307794 | HACE1        | - | loss |
| chr6 | 105384168 | 105388402 | LINC00577    | - | loss |
| chr6 | 105544698 | 105585049 | BVES         | - | loss |
| chr6 | 105605774 | 105627858 | POPDC3       | - | loss |
| chr6 | 105725441 | 105850999 | PREP         | - | loss |
| chr6 | 106632351 | 106773695 | ATG5         | - | loss |
| chr6 | 107018902 | 107078366 | RTN4IP1      | - | loss |

|      |           |           |              |   |      |
|------|-----------|-----------|--------------|---|------|
| chr6 | 107165326 | 107235300 | LOC100422737 | - | loss |
| chr6 | 107386384 | 107435636 | BEND3        | - | loss |
| chr6 | 107473760 | 107780779 | PDSS2        | - | loss |
| chr6 | 108023363 | 108145521 | SCML4        | - | loss |
| chr6 | 108188959 | 108279482 | SEC63        | - | loss |
| chr6 | 108362612 | 108395941 | OSTM1        | - | loss |
| chr6 | 108532716 | 108582464 | SNX3         | - | loss |
| chr6 | 109307639 | 109415708 | SESN1        | - | loss |
| chr6 | 109687716 | 109703762 | CD164        | - | loss |
| chr6 | 109711417 | 109762374 | PPIL6        | - | loss |
| chr6 | 109765265 | 109787171 | MICAL1       | - | loss |
| chr6 | 109783718 | 109804440 | ZBTB24       | - | loss |
| chr6 | 109814058 | 110012415 | AK9          | - | loss |
| chr6 | 110421021 | 110501207 | WASF1        | - | loss |
| chr6 | 110567148 | 110731939 | METTL24      | - | loss |
| chr6 | 110713382 | 110736753 | DDO          | - | loss |
| chr6 | 110745891 | 110797844 | SLC22A16     | - | loss |
| chr6 | 110931180 | 111136837 | CDK19        | - | loss |
| chr6 | 111367621 | 111368757 | GSTM2P1      | - | loss |
| chr6 | 111620233 | 111804918 | REV3L        | - | loss |
| chr6 | 111876580 | 111927477 | TRAF3IP2     | - | loss |
| chr6 | 111981534 | 112194655 | FYN          | - | loss |
| chr6 | 112391859 | 112408751 | TUBE1        | - | loss |
| chr6 | 112429133 | 112575917 | LAMA4        | - | loss |
| chr6 | 114189178 | 114194512 | LINC01268    | - | loss |
| chr6 | 114257319 | 114292359 | HDAC2        | - | loss |
| chr6 | 114376749 | 114663540 | HS3ST5       | - | loss |
| chr6 | 116262692 | 116381921 | FRK          | - | loss |
| chr6 | 116440084 | 116447296 | COL10A1      | - | loss |
| chr6 | 116571130 | 116575261 | TSPYL4       | - | loss |
| chr6 | 116596021 | 116601280 | TSPYL1       | - | loss |
| chr6 | 116817650 | 116866773 | TRAPPC3L     | - | loss |
| chr6 | 116956780 | 116989973 | ZUFSP        | - | loss |
| chr6 | 117073359 | 117086886 | FAM162B      | - | loss |
| chr6 | 117113247 | 117150198 | GPRC6A       | - | loss |
| chr6 | 117609529 | 117747018 | ROS1         | - | loss |
| chr6 | 117639350 | 117923705 | GOPC         | - | loss |
| chr6 | 118781934 | 119031238 | CEP85L       | - | loss |
| chr6 | 119134611 | 119256327 | MCM9         | - | loss |
| chr6 | 119280995 | 119470358 | FAM184A      | - | loss |
| chr6 | 119390211 | 119390308 | MIR548B      | - | loss |
| chr6 | 119498365 | 119670931 | MAN1A1       | - | loss |
| chr6 | 119773711 | 119812467 | LOC285762    | - | loss |
| chr8 | 182199    | 197339    | ZNF596       | + | loss |
| chr8 | 356807    | 419875    | FBXO25       | + | loss |
| chr8 | 687586    | 1087777   | ERICH1-AS1   | + | loss |
| chr8 | 1449531   | 1656642   | DLGAP2       | + | loss |
| chr8 | 1711869   | 1734736   | CLN8         | + | loss |
| chr8 | 1765396   | 1765473   | MIR596       | + | loss |
| chr8 | 1772148   | 1906807   | ARHGEF10     | + | loss |

|      |          |          |              |   |      |
|------|----------|----------|--------------|---|------|
| chr8 | 1922043  | 1955109  | KBTD11       | + | loss |
| chr8 | 1993157  | 2093380  | MYOM2        | + | loss |
| chr8 | 6264112  | 6501140  | MCPH1        | + | loss |
| chr8 | 6565877  | 6619021  | AGPAT5       | + | loss |
| chr8 | 6602684  | 6602765  | MIR4659A     | + | loss |
| chr8 | 6693075  | 6699975  | GS1-24F4.2   | + | loss |
| chr8 | 7353367  | 7366833  | DEFB107A     | + | loss |
| chr8 | 7627105  | 7628835  | FAM90A10P    | + | loss |
| chr8 | 7705401  | 7721319  | SPAG11A      | + | loss |
| chr8 | 7752198  | 7754237  | DEFB4A       | + | loss |
| chr8 | 7783858  | 7809935  | ZNF705B      | + | loss |
| chr8 | 7812534  | 7866277  | FAM66E       | + | loss |
| chr8 | 8086091  | 8102387  | FAM86B3P     | + | loss |
| chr8 | 8559665  | 8561617  | CLDN23       | + | loss |
| chr8 | 8860313  | 8890849  | ERI1         | + | loss |
| chr8 | 8905954  | 8906028  | MIR4660      | + | loss |
| chr8 | 9182560  | 9192590  | LOC157273    | + | loss |
| chr8 | 9413444  | 9639856  | TNKS         | + | loss |
| chr8 | 9599181  | 9599278  | MIR597       | + | loss |
| chr8 | 9911829  | 10286401 | MSRA         | + | loss |
| chr8 | 10383055 | 10411676 | PRSS55       | + | loss |
| chr8 | 10530146 | 10558103 | C8orf74      | + | loss |
| chr8 | 11141999 | 11185654 | MTMR9        | + | loss |
| chr8 | 11188494 | 11189695 | SLC35G5      | + | loss |
| chr8 | 11197145 | 11225961 | TDH          | + | loss |
| chr8 | 11225910 | 11296166 | C8orf12      | + | loss |
| chr8 | 11351520 | 11422108 | BLK          | + | loss |
| chr8 | 11434043 | 11438850 | LINC00208    | + | loss |
| chr8 | 11534467 | 11617509 | GATA4        | + | loss |
| chr8 | 11627171 | 11644854 | NEIL2        | + | loss |
| chr8 | 11653081 | 11696818 | FDFT1        | + | loss |
| chr8 | 11839829 | 11842099 | DEFB135      | + | loss |
| chr8 | 11946846 | 11973025 | ZNF705D      | + | loss |
| chr8 | 11973290 | 12008698 | FAM66D       | + | loss |
| chr8 | 11973290 | 12424354 | LOC100506990 | + | loss |
| chr8 | 12219527 | 12279970 | FAM66A       | + | loss |
| chr8 | 12584745 | 12584808 | MIR3926-2    | + | loss |
| chr8 | 12651751 | 12675800 | LINC00681    | + | loss |
| chr8 | 12803150 | 12889012 | KIAA1456     | + | loss |
| chr8 | 13424351 | 13425797 | C8orf48      | + | loss |
| chr8 | 15397595 | 15624158 | TUSC3        | + | loss |
| chr8 | 16884746 | 16980148 | MICU3        | + | loss |
| chr8 | 17013835 | 17080241 | ZDHHC2       | + | loss |
| chr8 | 17104400 | 17155533 | VPS37A       | + | loss |
| chr8 | 17354596 | 17428077 | SLC7A2       | + | loss |
| chr8 | 17433941 | 17500642 | PDGFRL       | + | loss |
| chr8 | 17780365 | 17887457 | PCM1         | + | loss |
| chr8 | 18027970 | 18081198 | NAT1         | + | loss |
| chr8 | 18248754 | 18258723 | NAT2         | + | loss |
| chr8 | 19171080 | 19253729 | SH2D4A       | + | loss |

|      |          |          |              |   |      |
|------|----------|----------|--------------|---|------|
| chr8 | 19674917 | 19709586 | INTS10       | + | loss |
| chr8 | 19796581 | 19824770 | LPL          | + | loss |
| chr8 | 20054703 | 20079207 | ATP6V1B2     | + | loss |
| chr8 | 20133283 | 20147969 | LZTS1-AS1    | + | loss |
| chr8 | 20831496 | 20852630 | LOC286114    | + | loss |
| chr8 | 21777179 | 21864096 | XPO7         | + | loss |
| chr8 | 21881644 | 21894408 | NPM2         | + | loss |
| chr8 | 21900427 | 21906319 | FGF17        | + | loss |
| chr8 | 21911080 | 21940036 | DMTN         | + | loss |
| chr8 | 21946713 | 21961891 | FAM160B2     | + | loss |
| chr8 | 22016233 | 22021991 | SFTPC        | + | loss |
| chr8 | 22022652 | 22069840 | BMP1         | + | loss |
| chr8 | 22102618 | 22108680 | POLR3D       | + | loss |
| chr8 | 22132809 | 22213584 | PIWIL2       | + | loss |
| chr8 | 22224761 | 22291640 | SLC39A14     | + | loss |
| chr8 | 22298482 | 22398657 | PPP3CC       | + | loss |
| chr8 | 22409250 | 22433008 | SORBS3       | + | loss |
| chr8 | 22436253 | 22455538 | PDLIM2       | + | loss |
| chr8 | 22457113 | 22461662 | C8orf58      | + | loss |
| chr8 | 22462144 | 22477983 | CCAR2        | + | loss |
| chr8 | 22844929 | 22877710 | RHOBTB2      | + | loss |
| chr8 | 22925741 | 22941132 | LOC286059    | + | loss |
| chr8 | 22941867 | 22961070 | LOC254896    | + | loss |
| chr8 | 22960326 | 22974950 | TNFRSF10C    | + | loss |
| chr8 | 23082733 | 23088439 | LOC389641    | + | loss |
| chr8 | 23101149 | 23119512 | CHMP7        | + | loss |
| chr8 | 23145611 | 23153792 | R3HCC1       | + | loss |
| chr8 | 23193720 | 23223638 | LOC100507156 | + | loss |
| chr8 | 23386362 | 23430063 | SLC25A37     | + | loss |
| chr8 | 24151579 | 24212726 | ADAM28       | + | loss |
| chr8 | 24241797 | 24263526 | ADAMDEC1     | + | loss |
| chr8 | 24298508 | 24384483 | ADAM7        | + | loss |
| chr8 | 24771273 | 24776606 | NEFM         | + | loss |
| chr8 | 25042286 | 25270619 | DOCK5        | + | loss |
| chr8 | 25230074 | 26230195 | PPP2R2A      | + | loss |
| chr8 | 25316512 | 25365425 | CDCA2        | + | loss |
| chr8 | 26240522 | 26270644 | BNIP3L       | + | loss |
| chr8 | 26371708 | 26515693 | DPYSL2       | + | loss |
| chr8 | 27168998 | 27316908 | PTK2B        | + | loss |
| chr8 | 27348518 | 27402439 | EPHX2        | + | loss |
| chr8 | 27491576 | 27534286 | SCARA3       | + | loss |
| chr8 | 27559193 | 27559276 | MIR3622A     | + | loss |
| chr8 | 27632057 | 27670141 | ESCO2        | + | loss |
| chr8 | 27947748 | 28048669 | ELP3         | + | loss |
| chr8 | 28174648 | 28200868 | PNOC         | + | loss |
| chr8 | 28351721 | 28431785 | FZD3         | + | loss |
| chr8 | 28558989 | 28611207 | EXTL3        | + | loss |
| chr8 | 28747910 | 28910242 | HMBBOX1      | + | loss |
| chr8 | 29779028 | 29811123 | FAM183CP     | + | loss |
| chr8 | 29952921 | 29995222 | LEPROTL1     | + | loss |

|      |          |          |              |   |      |
|------|----------|----------|--------------|---|------|
| chr8 | 30013812 | 30041155 | DCTN6        | + | loss |
| chr8 | 30241943 | 30429734 | RBPMS        | + | loss |
| chr8 | 30496116 | 30503469 | SMIM18       | + | loss |
| chr8 | 30601689 | 30624520 | UBXN8        | + | loss |
| chr8 | 30890777 | 31031277 | WRN          | + | loss |
| chr8 | 31496910 | 32622558 | NRG1         | + | loss |
| chr8 | 32298261 | 32300241 | NRG1-IT3     | + | loss |
| chr8 | 33342684 | 33358778 | MAK16        | + | loss |
| chr8 | 35092974 | 35652181 | UNC5D        | + | loss |
| chr8 | 36641841 | 36793643 | KCNU1        | + | loss |
| chr8 | 37553300 | 37556396 | ZNF703       | + | loss |
| chr8 | 37594096 | 37615319 | ERLIN2       | + | loss |
| chr8 | 37620100 | 37637286 | PROSC        | + | loss |
| chr8 | 37654400 | 37701504 | GPR124       | + | loss |
| chr8 | 37888019 | 37917883 | EIF4EBP1     | + | loss |
| chr8 | 37963010 | 37997598 | ASH2L        | + | loss |
| chr8 | 38034105 | 38070819 | BAG4         | + | loss |
| chr8 | 38089008 | 38120287 | DDHD2        | + | loss |
| chr8 | 38243958 | 38266062 | LETM2        | + | loss |
| chr8 | 38585703 | 38710546 | TACC1        | + | loss |
| chr8 | 38758752 | 38831430 | PLEKHA2      | + | loss |
| chr8 | 38831667 | 38846181 | HTRA4        | + | loss |
| chr8 | 38854504 | 38962779 | ADAM9        | + | loss |
| chr8 | 38965049 | 39142436 | ADAM32       | + | loss |
| chr8 | 39172181 | 39274897 | ADAM5        | + | loss |
| chr8 | 39420630 | 39437653 | LOC100130964 | + | loss |
| chr8 | 39442086 | 39587583 | ADAM18       | + | loss |
| chr8 | 39771327 | 39786309 | IDO1         | + | loss |
| chr8 | 39792473 | 39873910 | IDO2         | + | loss |
| chr8 | 40010986 | 40012827 | C8orf4       | + | loss |
| chr8 | 41348080 | 41368499 | GOLGA7       | + | loss |
| chr8 | 41386724 | 41402565 | GINS4        | + | loss |
| chr8 | 41435706 | 41482520 | AGPAT6       | + | loss |
| chr8 | 42010463 | 42028701 | AP3M2        | + | loss |
| chr8 | 42128819 | 42190171 | IKBKB        | + | loss |
| chr8 | 42195972 | 42229331 | POLB         | + | loss |
| chr8 | 42249278 | 42263455 | VDAC3        | + | loss |
| chr8 | 42396297 | 42408140 | SMIM19       | + | loss |
| chr8 | 42552561 | 42592209 | CHRN3        | + | loss |
| chr8 | 42752032 | 42885682 | HOOK3        | + | loss |
| chr8 | 42911441 | 42940932 | FNTA         | + | loss |
| chr8 | 42948648 | 42978323 | POMK         | + | loss |
| chr8 | 42995591 | 43057970 | HGSNAT       | + | loss |
| chr8 | 43147584 | 43218328 | POTEA        | + | loss |
| chr8 | 158344   | 182318   | RPL23AP53    | - | loss |
| chr8 | 439789   | 495781   | TDRP         | - | loss |
| chr8 | 614199   | 681226   | ERICH1       | - | loss |
| chr8 | 1244293  | 1250827  | LOC286083    | - | loss |
| chr8 | 2792874  | 4852328  | CSMD1        | - | loss |
| chr8 | 6261076  | 6264069  | LOC100287015 | - | loss |

|      |          |          |           |   |      |
|------|----------|----------|-----------|---|------|
| chr8 | 6357174  | 6420784  | ANGPT2    | - | loss |
| chr8 | 6602688  | 6602761  | MIR4659B  | - | loss |
| chr8 | 6666040  | 6693166  | XKR5      | - | loss |
| chr8 | 6728096  | 6735529  | DEFB1     | - | loss |
| chr8 | 6782215  | 6783598  | DEFA6     | - | loss |
| chr8 | 6793344  | 6795786  | DEFA4     | - | loss |
| chr8 | 6808247  | 6809121  | DEFA8P    | - | loss |
| chr8 | 6816810  | 6817683  | DEFA9P    | - | loss |
| chr8 | 6825662  | 6826635  | DEFA10P   | - | loss |
| chr8 | 6886122  | 6887011  | DEFA11P   | - | loss |
| chr8 | 6912828  | 6914259  | DEFA5     | - | loss |
| chr8 | 7143732  | 7212876  | FAM66B    | - | loss |
| chr8 | 7272384  | 7274354  | DEFB4B    | - | loss |
| chr8 | 7413659  | 7431920  | FAM90A7P  | - | loss |
| chr8 | 7669241  | 7673238  | DEFB107B  | - | loss |
| chr8 | 7829182  | 7830775  | USP17L8   | - | loss |
| chr8 | 7833914  | 7835507  | USP17L3   | - | loss |
| chr8 | 7946462  | 7946611  | MIR548I3  | - | loss |
| chr8 | 8175257  | 8239257  | SGK223    | - | loss |
| chr8 | 8641998  | 8751131  | MFHAS1    | - | loss |
| chr8 | 8993763  | 9009152  | PPP1R3B   | - | loss |
| chr8 | 9757573  | 9760839  | LINC00599 | - | loss |
| chr8 | 9760897  | 9760982  | MIR124-1  | - | loss |
| chr8 | 10463859 | 10512617 | RP1L1     | - | loss |
| chr8 | 10581277 | 10697299 | SOX7      | - | loss |
| chr8 | 10622883 | 10697299 | PINX1     | - | loss |
| chr8 | 10682882 | 10682953 | MIR1322   | - | loss |
| chr8 | 10753656 | 11058875 | XKR6      | - | loss |
| chr8 | 10892715 | 10892812 | MIR598    | - | loss |
| chr8 | 11278972 | 11324276 | FAM167A   | - | loss |
| chr8 | 11700033 | 11725646 | CTSB      | - | loss |
| chr8 | 11831445 | 11832108 | DEFB136   | - | loss |
| chr8 | 11851488 | 11853760 | DEFB134   | - | loss |
| chr8 | 11921897 | 12175825 | DEFB130   | - | loss |
| chr8 | 11985366 | 11986806 | LOC392196 | - | loss |
| chr8 | 11989925 | 11991518 | USP17L7   | - | loss |
| chr8 | 11994676 | 11996269 | USP17L2   | - | loss |
| chr8 | 12030962 | 12034776 | FAM90A2P  | - | loss |
| chr8 | 12039612 | 12051624 | FAM86B1   | - | loss |
| chr8 | 12236775 | 12237298 | LOC649352 | - | loss |
| chr8 | 12250792 | 12257874 | DEFB109P1 | - | loss |
| chr8 | 12272029 | 12275541 | FAM90A25P | - | loss |
| chr8 | 12283123 | 12293864 | FAM86B2   | - | loss |
| chr8 | 12394587 | 12523120 | LOC729732 | - | loss |
| chr8 | 12579405 | 12612992 | LONRF1    | - | loss |
| chr8 | 12584740 | 12584813 | MIR3926-1 | - | loss |
| chr8 | 12623570 | 12668910 | LOC340357 | - | loss |
| chr8 | 12940871 | 13372429 | DLC1      | - | loss |
| chr8 | 13947372 | 15095792 | SGCZ      | - | loss |
| chr8 | 14710946 | 14711019 | MIR383    | - | loss |

|      |          |          |              |   |      |
|------|----------|----------|--------------|---|------|
| chr8 | 15965386 | 16050300 | MSR1         | - | loss |
| chr8 | 16850333 | 16859674 | FGF20        | - | loss |
| chr8 | 17086739 | 17104387 | CNOT7        | - | loss |
| chr8 | 17154305 | 17271040 | MTMR7        | - | loss |
| chr8 | 17501302 | 17658426 | MTUS1        | - | loss |
| chr8 | 17721899 | 17767874 | FGL1         | - | loss |
| chr8 | 17913924 | 17942507 | ASAH1        | - | loss |
| chr8 | 18384812 | 18871196 | PSD3         | - | loss |
| chr8 | 19041185 | 19103032 | LOC100128993 | - | loss |
| chr8 | 19261671 | 19615382 | CSGALNACT1   | - | loss |
| chr8 | 20002365 | 20040717 | SLC18A1      | - | loss |
| chr8 | 20103675 | 20112803 | LZTS1        | - | loss |
| chr8 | 21549529 | 21646346 | GFRA2        | - | loss |
| chr8 | 21563901 | 21771205 | DOK2         | - | loss |
| chr8 | 21964382 | 21967456 | NUDT18       | - | loss |
| chr8 | 21971931 | 21988565 | HR           | - | loss |
| chr8 | 21995532 | 21999448 | REEP4        | - | loss |
| chr8 | 22004342 | 22014344 | LGI3         | - | loss |
| chr8 | 22077215 | 22089851 | PHYHIP       | - | loss |
| chr8 | 22102474 | 22102556 | MIR320A      | - | loss |
| chr8 | 22477946 | 22526661 | BIN3         | - | loss |
| chr8 | 22497883 | 22499722 | BIN3-IT1     | - | loss |
| chr8 | 22545173 | 22550815 | EGR3         | - | loss |
| chr8 | 22570764 | 22785421 | PEBP4        | - | loss |
| chr8 | 22877647 | 22926700 | TNFRSF10B    | - | loss |
| chr8 | 22993100 | 23021543 | TNFRSF10D    | - | loss |
| chr8 | 23048969 | 23082680 | TNFRSF10A    | - | loss |
| chr8 | 23154409 | 23261722 | LOXL2        | - | loss |
| chr8 | 23243441 | 23315244 | ENTPD4       | - | loss |
| chr8 | 23536205 | 23540450 | NKX3-1       | - | loss |
| chr8 | 23559963 | 23564111 | NKX2-6       | - | loss |
| chr8 | 23699433 | 23712320 | STC1         | - | loss |
| chr8 | 24808468 | 24814383 | NEFL         | - | loss |
| chr8 | 25276773 | 25282556 | GNRH1        | - | loss |
| chr8 | 25285363 | 25315984 | KCTD9        | - | loss |
| chr8 | 25699245 | 25902640 | EBF2         | - | loss |
| chr8 | 26362195 | 26371483 | PNMA2        | - | loss |
| chr8 | 26605666 | 26722922 | ADRA1A       | - | loss |
| chr8 | 27093813 | 27115903 | STMN4        | - | loss |
| chr8 | 27142403 | 27168834 | TRIM35       | - | loss |
| chr8 | 27317277 | 27336813 | CHRNA2       | - | loss |
| chr8 | 27454433 | 27472328 | CLU          | - | loss |
| chr8 | 27559189 | 27559284 | MIR3622B     | - | loss |
| chr8 | 27590832 | 27630170 | CCDC25       | - | loss |
| chr8 | 27667137 | 27695572 | PBK          | - | loss |
| chr8 | 27727398 | 27850369 | SCARA5       | - | loss |
| chr8 | 27743555 | 27743633 | MIR4287      | - | loss |
| chr8 | 27879480 | 27941388 | NUGGC        | - | loss |
| chr8 | 28203101 | 28347835 | ZNF395       | - | loss |
| chr8 | 28285925 | 28347835 | FBXO16       | - | loss |



|       |          |          |           |   |      |
|-------|----------|----------|-----------|---|------|
| chr8  | 28362632 | 28362699 | MIR4288   | - | loss |
| chr8  | 28625174 | 28747698 | INTS9     | - | loss |
| chr8  | 28924794 | 29120610 | KIF13B    | - | loss |
| chr8  | 29190578 | 29208267 | DUSP4     | - | loss |
| chr8  | 29578775 | 29605625 | LINC00589 | - | loss |
| chr8  | 29814787 | 29814864 | MIR3148   | - | loss |
| chr8  | 29920257 | 30108213 | MIR54802  | - | loss |
| chr8  | 29920630 | 29940649 | SARAF     | - | loss |
| chr8  | 29989186 | 30002200 | MBOAT4    | - | loss |
| chr8  | 30239634 | 30242917 | RBPMS-AS1 | - | loss |
| chr8  | 30436030 | 30515738 | GTF2E2    | - | loss |
| chr8  | 30535579 | 30585486 | GSR       | - | loss |
| chr8  | 30643125 | 30670352 | PPP2CB    | - | loss |
| chr8  | 30689059 | 30706533 | TEX15     | - | loss |
| chr8  | 30853320 | 30891231 | PURG      | - | loss |
| chr8  | 33228343 | 33330664 | FUT10     | - | loss |
| chr8  | 33330903 | 33370703 | TTI2      | - | loss |
| chr8  | 33405272 | 33424643 | RNF122    | - | loss |
| chr8  | 33448853 | 33457439 | DUSP26    | - | loss |
| chr8  | 37604073 | 37605564 | LOC728024 | - | loss |
| chr8  | 37701397 | 37707431 | BRF2      | - | loss |
| chr8  | 37716464 | 37757015 | RAB11FIP1 | - | loss |
| chr8  | 37791799 | 37797647 | GOT1L1    | - | loss |
| chr8  | 37820513 | 37824184 | ADRB3     | - | loss |
| chr8  | 38000217 | 38008600 | STAR      | - | loss |
| chr8  | 38020838 | 38034248 | LSM1      | - | loss |
| chr8  | 38120649 | 38126738 | PPAPDC1B  | - | loss |
| chr8  | 38132560 | 38239790 | WHSC1L1   | - | loss |
| chr8  | 38268655 | 38326352 | FGFR1     | - | loss |
| chr8  | 38368351 | 38386180 | C8orf86   | - | loss |
| chr8  | 38457692 | 38458775 | RNF5P1    | - | loss |
| chr8  | 38846326 | 38854041 | TM2D2     | - | loss |
| chr8  | 39601254 | 39695808 | ADAM2     | - | loss |
| chr8  | 40388110 | 40755343 | ZMAT4     | - | loss |
| chr8  | 41119475 | 41166990 | SFRP1     | - | loss |
| chr8  | 41503828 | 41643385 | NKX6-3    | - | loss |
| chr8  | 41510743 | 41754280 | ANK1      | - | loss |
| chr8  | 41517958 | 41518026 | MIR486-1  | - | loss |
| chr8  | 41786996 | 41909505 | KAT6A     | - | loss |
| chr8  | 42032235 | 42065194 | PLAT      | - | loss |
| chr8  | 42231585 | 42234674 | DKK4      | - | loss |
| chr8  | 42273979 | 42397356 | SLC20A2   | - | loss |
| chr8  | 42607779 | 42623929 | CHRNA6    | - | loss |
| chr8  | 42691816 | 42698474 | THAP1     | - | loss |
| chr8  | 42704779 | 42751866 | RNF170    | - | loss |
| chr8  | 42751339 | 42751418 | MIR4469   | - | loss |
| chr10 | 88414313 | 88426605 | OPN4      | + | loss |
| chr10 | 88426550 | 88495824 | LDB3      | + | loss |
| chr10 | 88516395 | 88684945 | BMPR1A    | + | loss |
| chr10 | 88718287 | 88723017 | SNCG      | + | loss |

|       |          |          |              |   |      |
|-------|----------|----------|--------------|---|------|
| chr10 | 88728187 | 88730666 | ADIRF        | + | loss |
| chr10 | 88730497 | 88784487 | AGAP11       | + | loss |
| chr10 | 88780045 | 88784487 | FAM25A       | + | loss |
| chr10 | 88854952 | 88951222 | FAM35A       | + | loss |
| chr10 | 88985204 | 88994733 | NUTM2A       | + | loss |
| chr10 | 89102167 | 89103331 | LOC439994    | + | loss |
| chr10 | 89117476 | 89130452 | NUTM2D       | + | loss |
| chr10 | 89263637 | 89263711 | MIR4678      | + | loss |
| chr10 | 89264222 | 89313218 | MINPP1       | + | loss |
| chr10 | 89419475 | 89507462 | PAPSS2       | + | loss |
| chr10 | 89578069 | 89605369 | CFL1P1       | + | loss |
| chr10 | 89623194 | 89728532 | PTEN         | + | loss |
| chr10 | 90346518 | 90366733 | LIPJ         | + | loss |
| chr10 | 90424145 | 90438572 | LIPF         | + | loss |
| chr10 | 90484300 | 90512513 | LIPK         | + | loss |
| chr10 | 90521162 | 90537999 | LIPN         | + | loss |
| chr10 | 90562486 | 90580303 | LIPM         | + | loss |
| chr10 | 90639943 | 90734910 | STAMBPL1     | + | loss |
| chr10 | 90729552 | 90775542 | FAS          | + | loss |
| chr10 | 90823092 | 90823167 | MIR4679-1    | + | loss |
| chr10 | 88695297 | 88717425 | MMRN2        | - | loss |
| chr10 | 88809958 | 88854776 | GLUD1        | - | loss |
| chr10 | 88965544 | 89102315 | NUTM2A-AS1   | - | loss |
| chr10 | 89156330 | 89167457 | LINC00864    | - | loss |
| chr10 | 89512874 | 89577917 | ATAD1        | - | loss |
| chr10 | 89618917 | 89623194 | KLLN         | - | loss |
| chr10 | 89892056 | 90343082 | RNLS         | - | loss |
| chr10 | 90579658 | 90611732 | ANKRD22      | - | loss |
| chr10 | 90694830 | 90751147 | ACTA2        | - | loss |
| chr10 | 90751180 | 90752732 | FAS-AS1      | - | loss |
| chr10 | 90823091 | 90823168 | MIR4679-2    | - | loss |
| chr10 | 90965693 | 90967071 | CH25H        | - | loss |
| chr10 | 90973325 | 91174382 | LIPA         | - | loss |
| chr12 | 11081833 | 11087444 | PRH2         | + | loss |
| chr12 | 11323779 | 11328619 | LOC100129361 | + | loss |
| chr12 | 11700963 | 11717335 | LINC01252    | + | loss |
| chr12 | 11802787 | 12268261 | ETV6         | + | loss |
| chr12 | 12223877 | 12363947 | BCL2L14      | + | loss |
| chr12 | 12510019 | 12619838 | LOH12CR1     | + | loss |
| chr12 | 12764830 | 12798041 | CREBL2       | + | loss |
| chr12 | 12870301 | 12875305 | CDKN1B       | + | loss |
| chr12 | 12878850 | 12944399 | APOLD1       | + | loss |
| chr12 | 12878850 | 12982915 | DDX47        | + | loss |
| chr12 | 12917582 | 12917677 | MIR613       | + | loss |
| chr12 | 13028410 | 13029070 | RPL13AP20    | + | loss |
| chr12 | 13043955 | 13066600 | GPRC5A       | + | loss |
| chr12 | 13068762 | 13068852 | MIR614       | + | loss |
| chr12 | 13132770 | 13137576 | LOC100506314 | + | loss |
| chr12 | 13153375 | 13157764 | HTR7P1       | + | loss |
| chr12 | 13197314 | 13236383 | KIAA1467     | + | loss |

|       |          |          |           |   |      |
|-------|----------|----------|-----------|---|------|
| chr12 | 13349601 | 13369708 | EMP1      | + | loss |
| chr12 | 14518610 | 14651697 | ATF7IP    | + | loss |
| chr12 | 14927269 | 14930936 | H2AFJ     | + | loss |
| chr12 | 14956505 | 14976791 | C12orf60  | + | loss |
| chr12 | 15125955 | 15134799 | PDE6H     | + | loss |
| chr12 | 10771537 | 10826891 | STYK1     | - | loss |
| chr12 | 10851675 | 10875953 | YBX3      | - | loss |
| chr12 | 10954130 | 10955226 | TAS2R7    | - | loss |
| chr12 | 10958649 | 10959579 | TAS2R8    | - | loss |
| chr12 | 10961692 | 10962767 | TAS2R9    | - | loss |
| chr12 | 10977944 | 10978868 | TAS2R10   | - | loss |
| chr12 | 10998447 | 11002075 | PRR4      | - | loss |
| chr12 | 10998447 | 11324224 | PRH1-PRR4 | - | loss |
| chr12 | 11033559 | 11036874 | PRH1      | - | loss |
| chr12 | 11033559 | 11463369 | PRB4      | - | loss |
| chr12 | 11060524 | 11062161 | TAS2R13   | - | loss |
| chr12 | 11090852 | 11091806 | TAS2R14   | - | loss |
| chr12 | 11138511 | 11139511 | TAS2R50   | - | loss |
| chr12 | 11148560 | 11150474 | TAS2R20   | - | loss |
| chr12 | 11174270 | 11175170 | TAS2R19   | - | loss |
| chr12 | 11182985 | 11184006 | TAS2R31   | - | loss |
| chr12 | 11213963 | 11214893 | TAS2R46   | - | loss |
| chr12 | 11243885 | 11244912 | TAS2R43   | - | loss |
| chr12 | 11285883 | 11286843 | TAS2R30   | - | loss |
| chr12 | 11338598 | 11339543 | TAS2R42   | - | loss |
| chr12 | 11418856 | 11422641 | PRB3      | - | loss |
| chr12 | 11504756 | 11508524 | PRB1      | - | loss |
| chr12 | 11544473 | 11548498 | PRB2      | - | loss |
| chr12 | 12268960 | 12419811 | LRP6      | - | loss |
| chr12 | 12482217 | 12503169 | MANSC1    | - | loss |
| chr12 | 12508341 | 12510001 | LOH12CR2  | - | loss |
| chr12 | 12626215 | 12715448 | DUSP16    | - | loss |
| chr12 | 12813994 | 12849121 | GPR19     | - | loss |
| chr12 | 13093708 | 13103318 | GPRC5D    | - | loss |
| chr12 | 13127798 | 13153243 | HEBP1     | - | loss |
| chr12 | 13236470 | 13256630 | GSG1      | - | loss |
| chr12 | 13523604 | 13529679 | C12orf36  | - | loss |
| chr12 | 13714409 | 14133022 | GRIN2B    | - | loss |
| chr12 | 14656596 | 14720791 | PLBD1     | - | loss |
| chr12 | 14765567 | 14849519 | GUCY2C    | - | loss |
| chr12 | 14923653 | 14924065 | HIST4H4   | - | loss |
| chr12 | 14939411 | 14956401 | WBP11     | - | loss |
| chr12 | 14957583 | 14967116 | SMCO3     | - | loss |
| chr12 | 14982244 | 14996413 | ART4      | - | loss |
| chr12 | 15034114 | 15038853 | MGP       | - | loss |
| chr12 | 15066975 | 15091463 | ERP27     | - | loss |
| chr12 | 15094949 | 15114562 | ARHGDIB   | - | loss |
| chr13 | 35516423 | 36246874 | NBEA      | + | loss |
| chr13 | 36920567 | 36943872 | SPG20OS   | + | loss |
| chr13 | 37005656 | 37017019 | CCNA1     | + | loss |

|       |          |          |           |   |      |
|-------|----------|----------|-----------|---|------|
| chr13 | 37248048 | 37271975 | SERTM1    | + | loss |
| chr13 | 37393338 | 37403740 | RFXAP     | + | loss |
| chr13 | 37574677 | 37583751 | EXOSC8    | + | loss |
| chr13 | 38109076 | 38125673 | LINC00547 | + | loss |
| chr13 | 38923941 | 38937143 | UFM1      | + | loss |
| chr13 | 39141860 | 39153653 | LINC00366 | + | loss |
| chr13 | 39261172 | 39461267 | FREM2     | + | loss |
| chr13 | 39612447 | 39624244 | NHLRC3    | + | loss |
| chr13 | 40229763 | 40365802 | COG6      | + | loss |
| chr13 | 40755945 | 40763167 | LINC00332 | + | loss |
| chr13 | 41363546 | 41386596 | SLC25A15  | + | loss |
| chr13 | 41384901 | 41384997 | MIR621    | + | loss |
| chr13 | 41635696 | 41658139 | WBP4      | + | loss |
| chr13 | 41885340 | 41951166 | NAA16     | + | loss |
| chr13 | 42016699 | 42017902 | OR7E37P   | + | loss |
| chr13 | 42031541 | 42045013 | RGCC      | + | loss |
| chr13 | 42535304 | 42555701 | VWA8-AS1  | + | loss |
| chr13 | 42614171 | 42830716 | DGKH      | + | loss |
| chr13 | 42846288 | 42897403 | AKAP11    | + | loss |
| chr13 | 43136871 | 43182149 | TNFSF11   | + | loss |
| chr13 | 43355685 | 43365685 | FAM216B   | + | loss |
| chr13 | 43597361 | 43683306 | DNAJC15   | + | loss |
| chr13 | 44453419 | 44468068 | LACC1     | + | loss |
| chr13 | 44596470 | 44604599 | LINC00284 | + | loss |
| chr13 | 44947977 | 44971850 | SERP2     | + | loss |
| chr13 | 45563686 | 45607743 | GPALPP1   | + | loss |
| chr13 | 45694630 | 45858239 | GTF2F2    | + | loss |
| chr13 | 45915479 | 45965618 | TPT1-AS1  | + | loss |
| chr13 | 46039029 | 46110833 | COG3      | + | loss |
| chr13 | 46276445 | 46288693 | SPERT     | + | loss |
| chr13 | 46626982 | 46675482 | CPB2-AS1  | + | loss |
| chr13 | 47127295 | 47327175 | LRCH1     | + | loss |
| chr13 | 48611702 | 48621282 | NUDT15    | + | loss |
| chr13 | 48651272 | 48654129 | MED4-AS1  | + | loss |
| chr13 | 48807273 | 48836232 | ITM2B     | + | loss |
| chr13 | 48877882 | 49056026 | RB1       | + | loss |
| chr13 | 49280952 | 49283498 | CYSLTR2   | + | loss |
| chr13 | 49550047 | 49783915 | FND3A     | + | loss |
| chr13 | 49794473 | 49796513 | MLNR      | + | loss |
| chr13 | 49822046 | 49867622 | CDADC1    | + | loss |
| chr13 | 50018428 | 50069139 | SETDB2    | + | loss |
| chr13 | 50069800 | 50103117 | PHF11     | + | loss |
| chr13 | 50202434 | 50208008 | ARL11     | + | loss |
| chr13 | 50464544 | 50467516 | CTAGE10P  | + | loss |
| chr13 | 50571142 | 50592603 | TRIM13    | + | loss |
| chr13 | 50589389 | 50595058 | KCNRG     | + | loss |
| chr13 | 50656413 | 51102670 | DLEU1     | + | loss |
| chr13 | 50746153 | 50747751 | ST13P4    | + | loss |
| chr13 | 51381990 | 51424041 | DLEU7-AS1 | + | loss |
| chr13 | 51483813 | 51544596 | RNASEH2B  | + | loss |

|       |          |          |               |   |      |
|-------|----------|----------|---------------|---|------|
| chr13 | 51796469 | 51858377 | FAM124A       | + | loss |
| chr13 | 51915167 | 51938418 | SERPINE3      | + | loss |
| chr13 | 52126724 | 52126803 | MIR4703       | + | loss |
| chr13 | 52158483 | 52336171 | WDFY2         | + | loss |
| chr13 | 52436116 | 52440372 | CCDC70        | + | loss |
| chr13 | 52586522 | 52591849 | ALG11         | + | loss |
| chr13 | 52586522 | 52607736 | UTP14C        | + | loss |
| chr13 | 53029494 | 53050763 | CKAP2         | + | loss |
| chr13 | 53063127 | 53161225 | TPTE2P3       | + | loss |
| chr13 | 53191604 | 53217919 | HNRNPA1L2     | + | loss |
| chr13 | 53226830 | 53262433 | SUGT1         | + | loss |
| chr13 | 53384184 | 53384275 | MIR759        | + | loss |
| chr13 | 53602875 | 53626196 | OLFM4         | + | loss |
| chr13 | 54389553 | 54450254 | LINC00558     | + | loss |
| chr13 | 55748588 | 55748683 | MIR5007       | + | loss |
| chr13 | 57715051 | 57731216 | PRR20D        | + | loss |
| chr13 | 57734765 | 57737787 | PRR20B        | + | loss |
| chr13 | 57741330 | 57744352 | PRR20E        | + | loss |
| chr13 | 58205788 | 58303065 | PCDH17        | + | loss |
| chr13 | 60586884 | 60618490 | DIAPH3-AS1    | + | loss |
| chr13 | 60718831 | 60727639 | DIAPH3-AS2    | + | loss |
| chr13 | 60970590 | 61148013 | TDRD3         | + | loss |
| chr13 | 64311567 | 64316701 | OR7E156P      | + | loss |
| chr13 | 67399300 | 67489163 | PCDH9-AS2     | + | loss |
| chr13 | 67551520 | 67559908 | PCDH9-AS3     | + | loss |
| chr13 | 70681344 | 70713885 | ATXN8OS       | + | loss |
| chr13 | 71589272 | 71742549 | LINC00348     | + | loss |
| chr13 | 73302041 | 73330328 | BORA          | + | loss |
| chr13 | 73356229 | 73590591 | PIBF1         | + | loss |
| chr13 | 73629113 | 73651676 | KLF5          | + | loss |
| chr13 | 74993309 | 75009296 | LINC00381     | + | loss |
| chr13 | 75126979 | 75131257 | LINC00347     | + | loss |
| chr13 | 76123615 | 76180156 | UCHL3         | + | loss |
| chr13 | 76194569 | 76434006 | LMO7          | + | loss |
| chr13 | 76445173 | 76457948 | LMO7DN        | + | loss |
| chr13 | 77502584 | 77503224 | BTF3P11       | + | loss |
| chr13 | 77522693 | 77532776 | IRG1          | + | loss |
| chr13 | 77566058 | 77576652 | CLN5          | + | loss |
| chr13 | 77649648 | 77661911 | MYCBP2-AS1    | + | loss |
| chr13 | 78109808 | 78219398 | SCEL          | + | loss |
| chr13 | 78271988 | 78338377 | SLAIN1        | + | loss |
| chr13 | 78493823 | 79191460 | RNF219-AS1    | + | loss |
| chr13 | 78587017 | 78627730 | LINC00446     | + | loss |
| chr13 | 36047925 | 36515382 | MIR548F5      | - | loss |
| chr13 | 36342788 | 36705514 | DCLK1         | - | loss |
| chr13 | 36742344 | 36788752 | SOHLH2        | - | loss |
| chr13 | 36742344 | 36871992 | CCDC169-SOHLH | - | loss |
| chr13 | 36801178 | 36871992 | CCDC169       | - | loss |
| chr13 | 36875774 | 36944317 | SPG20         | - | loss |
| chr13 | 37418967 | 37494409 | SMAD9         | - | loss |

|       |          |          |           |   |      |
|-------|----------|----------|-----------|---|------|
| chr13 | 37523907 | 37573504 | ALG5      | - | loss |
| chr13 | 37583450 | 37633850 | SUPT20H   | - | loss |
| chr13 | 37677396 | 37679801 | CSNK1A1L  | - | loss |
| chr13 | 38136718 | 38183563 | POSTN     | - | loss |
| chr13 | 38210772 | 38443939 | TRPC4     | - | loss |
| chr13 | 38624953 | 38717369 | LINC00571 | - | loss |
| chr13 | 39540061 | 39564996 | STOML3    | - | loss |
| chr13 | 39584001 | 39612213 | PROSER1   | - | loss |
| chr13 | 39917028 | 40177356 | LHFP      | - | loss |
| chr13 | 40238170 | 40238272 | MIR4305   | - | loss |
| chr13 | 40768645 | 40794639 | LINC00548 | - | loss |
| chr13 | 40921270 | 41055143 | LINC00598 | - | loss |
| chr13 | 41048130 | 41240734 | FOXO1     | - | loss |
| chr13 | 41301963 | 41302011 | MIR320D1  | - | loss |
| chr13 | 41303431 | 41345347 | MRPS31    | - | loss |
| chr13 | 41371120 | 41495910 | TPTE2P5   | - | loss |
| chr13 | 41486024 | 41495910 | SUGT1P3   | - | loss |
| chr13 | 41506054 | 41593508 | ELF1      | - | loss |
| chr13 | 41701708 | 41706936 | KBTD6     | - | loss |
| chr13 | 41765710 | 41768702 | KBTD7     | - | loss |
| chr13 | 41790515 | 41837742 | MTRF1     | - | loss |
| chr13 | 42140960 | 42535221 | VWA8      | - | loss |
| chr13 | 42142421 | 42142531 | MIR5006   | - | loss |
| chr13 | 43460523 | 43566407 | EPSTI1    | - | loss |
| chr13 | 43787665 | 44361116 | ENOX1     | - | loss |
| chr13 | 44410488 | 44453826 | CCDC122   | - | loss |
| chr13 | 44720605 | 44732358 | SMIM2-IT1 | - | loss |
| chr13 | 45006278 | 45150701 | TSC22D1   | - | loss |
| chr13 | 45373639 | 45383766 | LINC00330 | - | loss |
| chr13 | 45513383 | 45563613 | NUFIP1    | - | loss |
| chr13 | 45766987 | 45775175 | KCTD4     | - | loss |
| chr13 | 45911303 | 45915297 | TPT1      | - | loss |
| chr13 | 45911614 | 45911744 | SNORA31   | - | loss |
| chr13 | 45967453 | 45992516 | SLC25A30  | - | loss |
| chr13 | 46115431 | 46189874 | ERICH6B   | - | loss |
| chr13 | 46354415 | 46425846 | SIAH3     | - | loss |
| chr13 | 46529804 | 46626894 | ZC3H13    | - | loss |
| chr13 | 46627321 | 46679211 | CPB2      | - | loss |
| chr13 | 46700057 | 46756459 | LCP1      | - | loss |
| chr13 | 46870579 | 46871979 | LINC00563 | - | loss |
| chr13 | 46916136 | 47012325 | KIAA0226L | - | loss |
| chr13 | 47345390 | 47371367 | ESD       | - | loss |
| chr13 | 47405676 | 47471211 | HTR2A     | - | loss |
| chr13 | 48516790 | 48612125 | SUCLA2    | - | loss |
| chr13 | 48649863 | 48669277 | MED4      | - | loss |
| chr13 | 48870648 | 48877797 | LINC00441 | - | loss |
| chr13 | 48963706 | 49018840 | LPAR6     | - | loss |
| chr13 | 49063098 | 49110118 | RCBTB2    | - | loss |
| chr13 | 49151109 | 49155037 | LINC00462 | - | loss |
| chr13 | 49882785 | 50018221 | CAB39L    | - | loss |

|       |          |          |              |   |      |
|-------|----------|----------|--------------|---|------|
| chr13 | 50106081 | 50159719 | RCBTB1       | - | loss |
| chr13 | 50234809 | 50265623 | EBPL         | - | loss |
| chr13 | 50273442 | 50367057 | KPNA3        | - | loss |
| chr13 | 50486841 | 50510625 | SPRYD7       | - | loss |
| chr13 | 50556687 | 50699677 | DLEU2        | - | loss |
| chr13 | 50570550 | 50570637 | MIR3613      | - | loss |
| chr13 | 50623108 | 50623337 | MIR16-1      | - | loss |
| chr13 | 51286758 | 51417885 | DLEU7        | - | loss |
| chr13 | 51456514 | 51484848 | RNASEH2B-AS1 | - | loss |
| chr13 | 51568646 | 51654998 | GUCY1B2      | - | loss |
| chr13 | 51658150 | 51746524 | LINC00371    | - | loss |
| chr13 | 51922702 | 51922775 | MIR5693      | - | loss |
| chr13 | 51935700 | 52027275 | INTS6        | - | loss |
| chr13 | 52342128 | 52378298 | DHRS12       | - | loss |
| chr13 | 52387482 | 52419286 | LINC00282    | - | loss |
| chr13 | 52506805 | 52585630 | ATP7B        | - | loss |
| chr13 | 52638899 | 52703214 | NEK5         | - | loss |
| chr13 | 52706778 | 52733996 | NEK3         | - | loss |
| chr13 | 52741844 | 52865680 | MRPS31P5     | - | loss |
| chr13 | 52951302 | 52980629 | THSD1        | - | loss |
| chr13 | 52986736 | 53024763 | VPS36        | - | loss |
| chr13 | 53277399 | 53313947 | LECT1        | - | loss |
| chr13 | 53418108 | 53422775 | PCDH8        | - | loss |
| chr13 | 54886106 | 54886183 | MIR1297      | - | loss |
| chr13 | 60239720 | 60738119 | DIAPH3       | - | loss |
| chr13 | 61773931 | 61774014 | MIR3169      | - | loss |
| chr13 | 61983818 | 62002079 | PCDH20       | - | loss |
| chr13 | 66876965 | 67804468 | PCDH9        | - | loss |
| chr13 | 69435416 | 69459457 | LINC00550    | - | loss |
| chr13 | 70274724 | 70682625 | KLHL1        | - | loss |
| chr13 | 72012097 | 72441330 | DACH1        | - | loss |
| chr13 | 73282494 | 73301938 | MZT1         | - | loss |
| chr13 | 73329539 | 73356344 | DIS3         | - | loss |
| chr13 | 74260148 | 74708394 | KLF12        | - | loss |
| chr13 | 75811888 | 75814517 | CTAGE11P     | - | loss |
| chr13 | 75858808 | 76056250 | TBC1D4       | - | loss |
| chr13 | 76099349 | 76111991 | COMMD6       | - | loss |
| chr13 | 77454303 | 77460540 | KCTD12       | - | loss |
| chr13 | 77579388 | 77601331 | FBXL3        | - | loss |
| chr13 | 77618791 | 77901177 | MYCBP2       | - | loss |
| chr13 | 78272146 | 78272251 | MIR3665      | - | loss |
| chr13 | 78469615 | 78549664 | EDNRB        | - | loss |
| chr13 | 79173229 | 79177695 | POU4F1       | - | loss |
| chr13 | 79188420 | 79234700 | RNF219       | - | loss |
| chr13 | 79361453 | 79414185 | LINC00331    | - | loss |
| chr16 | 74330672 | 74340186 | PSMD7        | + | loss |
| chr16 | 75032914 | 75144892 | ZNRF1        | + | loss |
| chr16 | 75182420 | 75206132 | ZFP1         | + | loss |
| chr16 | 75252883 | 75258822 | CTRB1        | + | loss |
| chr16 | 75600248 | 75611779 | GABARAPL2    | + | loss |

|       |          |          |              |   |      |
|-------|----------|----------|--------------|---|------|
| chr16 | 75681634 | 75691341 | TERF2IP      | + | loss |
| chr16 | 76311175 | 76593135 | CNTNAP4      | + | loss |
| chr16 | 76902832 | 76902916 | MIR4719      | + | loss |
| chr16 | 77224835 | 77233543 | MON1B        | + | loss |
| chr16 | 77233348 | 77246976 | SYCE1L       | + | loss |
| chr16 | 77756388 | 77776157 | NUDT7        | + | loss |
| chr16 | 77822482 | 78014001 | VAT1L        | + | loss |
| chr16 | 78056442 | 78066001 | CLEC3A       | + | loss |
| chr16 | 78133326 | 79246564 | WVOX         | + | loss |
| chr16 | 80574853 | 80584541 | DYNLRB2      | + | loss |
| chr16 | 81040102 | 81066709 | CENPN        | + | loss |
| chr16 | 81069457 | 81080951 | ATMIN        | + | loss |
| chr16 | 81272295 | 81324747 | BCO1         | + | loss |
| chr16 | 81348570 | 81413803 | GAN          | + | loss |
| chr16 | 81418622 | 81418698 | MIR4720      | + | loss |
| chr16 | 81478774 | 81745367 | CMIP         | + | loss |
| chr16 | 81698958 | 81700879 | LOC100129617 | + | loss |
| chr16 | 81812898 | 81991899 | PLCG2        | + | loss |
| chr16 | 82068857 | 82132139 | HSD17B2      | + | loss |
| chr16 | 82660398 | 83830215 | CDH13        | + | loss |
| chr16 | 83541950 | 83542013 | MIR3182      | + | loss |
| chr16 | 83841507 | 83846607 | HSBP1        | + | loss |
| chr16 | 83932729 | 83949787 | MLYCD        | + | loss |
| chr16 | 83982671 | 83999937 | OSGIN1       | + | loss |
| chr16 | 84002236 | 84036379 | NECAB2       | + | loss |
| chr16 | 84178864 | 84211524 | DNAAF1       | + | loss |
| chr16 | 84224722 | 84230772 | ADAD2        | + | loss |
| chr16 | 84328400 | 84363450 | WFDC1        | + | loss |
| chr16 | 84402132 | 84497793 | ATP2C2       | + | loss |
| chr16 | 84682130 | 84695916 | KLHL36       | + | loss |
| chr16 | 84733554 | 84813527 | USP10        | + | loss |
| chr16 | 84853586 | 84943116 | CRISPLD2     | + | loss |
| chr16 | 85061374 | 85127828 | KIAA0513     | + | loss |
| chr16 | 85170755 | 85183049 | LOC400548    | + | loss |
| chr16 | 85316563 | 85321685 | LINC00311    | + | loss |
| chr16 | 85645028 | 85709812 | GSE1         | + | loss |
| chr16 | 85833172 | 85840607 | COX4I1       | + | loss |
| chr16 | 85932773 | 85956211 | IRF8         | + | loss |
| chr16 | 86320036 | 86326995 | LOC146513    | + | loss |
| chr16 | 86544132 | 86548070 | FOXF1        | + | loss |
| chr16 | 86588925 | 86590905 | FLJ30679     | + | loss |
| chr16 | 86600856 | 86602537 | FOXC2        | + | loss |
| chr16 | 86612114 | 86615304 | FOXL1        | + | loss |
| chr16 | 87425800 | 87438380 | MAP1LC3B     | + | loss |
| chr16 | 87635440 | 87731761 | JPH3         | + | loss |
| chr16 | 87984237 | 88110924 | BANP         | + | loss |
| chr16 | 88493878 | 88507165 | ZNF469       | + | loss |
| chr16 | 88520013 | 88601574 | ZFPM1        | + | loss |
| chr16 | 88535325 | 88535439 | MIR5189      | + | loss |
| chr16 | 88636788 | 88698372 | ZC3H18       | + | loss |



|       |          |          |              |   |      |
|-------|----------|----------|--------------|---|------|
| chr16 | 88705000 | 88706882 | IL17C        | + | loss |
| chr16 | 88729780 | 88753594 | SNAI3-AS1    | + | loss |
| chr16 | 88772890 | 88781786 | CTU2         | + | loss |
| chr16 | 88870185 | 88875666 | CDT1         | + | loss |
| chr16 | 88922627 | 88927591 | TRAPPC2L     | + | loss |
| chr16 | 89160216 | 89222171 | ACSF3        | + | loss |
| chr16 | 89225627 | 89230083 | LINC00304    | + | loss |
| chr16 | 89232790 | 89235555 | LOC400558    | + | loss |
| chr16 | 89238162 | 89261900 | CDH15        | + | loss |
| chr16 | 89284110 | 89295965 | ZNF778       | + | loss |
| chr16 | 89387540 | 89391518 | LOC100287036 | + | loss |
| chr16 | 89574804 | 89624174 | SPG7         | + | loss |
| chr16 | 89627064 | 89633237 | RPL13        | + | loss |
| chr16 | 89627837 | 89627909 | SNORD68      | + | loss |
| chr16 | 89642175 | 89663654 | CPNE7        | + | loss |
| chr16 | 89679715 | 89704839 | DPEP1        | + | loss |
| chr16 | 89724151 | 89736866 | SPATA33      | + | loss |
| chr16 | 89753075 | 89762772 | CDK10        | + | loss |
| chr16 | 89778263 | 89784573 | VPS9D1-AS1   | + | loss |
| chr16 | 89786807 | 89807332 | ZNF276       | + | loss |
| chr16 | 89894906 | 89937727 | SPIRE2       | + | loss |
| chr16 | 89939993 | 89977792 | TCF25        | + | loss |
| chr16 | 89984286 | 89987385 | MC1R         | + | loss |
| chr16 | 89985258 | 90002505 | TUBB3        | + | loss |
| chr16 | 90015138 | 90034468 | DEF8         | + | loss |
| chr16 | 90038987 | 90067195 | AFG3L1P      | + | loss |
| chr16 | 90086068 | 90111379 | GAS8         | + | loss |
| chr16 | 74366303 | 74402153 | LOC283922    | - | loss |
| chr16 | 74442528 | 74455649 | CLEC18B      | - | loss |
| chr16 | 74481325 | 74641042 | GLG1         | - | loss |
| chr16 | 74907470 | 75019017 | WDR59        | - | loss |
| chr16 | 75145757 | 75150670 | LDHD         | - | loss |
| chr16 | 75237993 | 75241072 | CTRB2        | - | loss |
| chr16 | 75262927 | 75301951 | BCAR1        | - | loss |
| chr16 | 75327607 | 75467387 | CFDP1        | - | loss |
| chr16 | 75477141 | 75498584 | TMEM170A     | - | loss |
| chr16 | 75507021 | 75528926 | CHST6        | - | loss |
| chr16 | 75562427 | 75579393 | CHST5        | - | loss |
| chr16 | 75572014 | 75590184 | TMEM231      | - | loss |
| chr16 | 75632246 | 75657221 | ADAT1        | - | loss |
| chr16 | 75661621 | 75682541 | KARS         | - | loss |
| chr16 | 77316024 | 77469011 | ADAMTS18     | - | loss |
| chr16 | 79627744 | 79634622 | MAF          | - | loss |
| chr16 | 80637675 | 80838175 | CDYL2        | - | loss |
| chr16 | 81009698 | 81040502 | CMC2         | - | loss |
| chr16 | 81087101 | 81110872 | C16orf46     | - | loss |
| chr16 | 81115551 | 81129980 | GCSH         | - | loss |
| chr16 | 81134483 | 81253975 | PKD1L2       | - | loss |
| chr16 | 82031250 | 82045093 | SDR42E1      | - | loss |
| chr16 | 82181766 | 82203829 | MPHOSPH6     | - | loss |

|       |          |          |           |   |      |
|-------|----------|----------|-----------|---|------|
| chr16 | 84043388 | 84075762 | SLC38A8   | - | loss |
| chr16 | 84087368 | 84150517 | MBTPS1    | - | loss |
| chr16 | 84155743 | 84178800 | HSDL1     | - | loss |
| chr16 | 84211452 | 84220676 | TAF1C     | - | loss |
| chr16 | 84254740 | 84273356 | KCNG4     | - | loss |
| chr16 | 84509965 | 84538288 | TLDC1     | - | loss |
| chr16 | 84599203 | 84651669 | COTL1     | - | loss |
| chr16 | 85008066 | 85045141 | ZDHHC7    | - | loss |
| chr16 | 85131964 | 85146114 | FAM92B    | - | loss |
| chr16 | 85339831 | 85339931 | MIR5093   | - | loss |
| chr16 | 85711279 | 85722588 | GINS2     | - | loss |
| chr16 | 85741123 | 85784689 | C16orf74  | - | loss |
| chr16 | 85775226 | 85775306 | MIR1910   | - | loss |
| chr16 | 85812230 | 85833148 | EMC8      | - | loss |
| chr16 | 86365455 | 86379285 | LINC00917 | - | loss |
| chr16 | 86508130 | 86542466 | FENDRR    | - | loss |
| chr16 | 86563781 | 86588841 | MTHFSD    | - | loss |
| chr16 | 87336403 | 87351026 | C16orf95  | - | loss |
| chr16 | 87362941 | 87425708 | FBXO31    | - | loss |
| chr16 | 87439851 | 87525460 | ZCCHC14   | - | loss |
| chr16 | 87736728 | 87799598 | KLHDC4    | - | loss |
| chr16 | 87863628 | 87903100 | SLC7A5    | - | loss |
| chr16 | 87921624 | 87970112 | CA5A      | - | loss |
| chr16 | 88709696 | 88717492 | CYBA      | - | loss |
| chr16 | 88718347 | 88729495 | MVD       | - | loss |
| chr16 | 88744089 | 88752882 | SNAI3     | - | loss |
| chr16 | 88762902 | 88772829 | RNF166    | - | loss |
| chr16 | 88781745 | 88851372 | PIEZO1    | - | loss |
| chr16 | 88782685 | 88782745 | MIR4722   | - | loss |
| chr16 | 88875876 | 88878342 | APRT      | - | loss |
| chr16 | 88880141 | 88923374 | GALNS     | - | loss |
| chr16 | 88928035 | 88933068 | PABPN1L   | - | loss |
| chr16 | 88941262 | 89043504 | CBFA2T3   | - | loss |
| chr16 | 89262168 | 89266529 | SLC22A31  | - | loss |
| chr16 | 89334028 | 89556969 | ANKRD11   | - | loss |
| chr16 | 89710838 | 89724193 | CHMP1A    | - | loss |
| chr16 | 89762764 | 89768121 | SPATA2L   | - | loss |
| chr16 | 89773540 | 89787394 | VPS9D1    | - | loss |
| chr16 | 89803958 | 89883065 | FANCA     | - | loss |
| chr16 | 90036182 | 90039240 | CENPBD1   | - | loss |
| chr16 | 90071278 | 90086328 | DBNDD1    | - | loss |
| chr16 | 90095315 | 90096309 | C16orf3   | - | loss |
| chr16 | 90106168 | 90114191 | URAHP     | - | loss |
| chr16 | 90122973 | 90142338 | PRDM7     | - | loss |
| chr21 | 40177230 | 40196878 | ETS2      | + | loss |
| chr21 | 40687632 | 40695144 | BRWD1-AS1 | + | loss |
| chr21 | 40752212 | 40786214 | WRB       | + | loss |
| chr21 | 40817796 | 40887433 | SH3BGR    | + | loss |
| chr21 | 40928368 | 41034815 | B3GALT5   | + | loss |
| chr21 | 41117333 | 41174023 | IGSF5     | + | loss |

|       |          |          |            |   |      |
|-------|----------|----------|------------|---|------|
| chr21 | 41239346 | 41301322 | PCP4       | + | loss |
| chr21 | 41755009 | 41757285 | DSCAM-AS1  | + | loss |
| chr21 | 42539483 | 42539556 | MIR3197    | + | loss |
| chr21 | 42539727 | 42648524 | BACE2      | + | loss |
| chr21 | 42676176 | 42729654 | FAM3B      | + | loss |
| chr21 | 42733949 | 42780869 | MX2        | + | loss |
| chr21 | 42792519 | 42831141 | MX1        | + | loss |
| chr21 | 39739182 | 40033704 | ERG        | - | loss |
| chr21 | 40110878 | 40145401 | LINC00114  | - | loss |
| chr21 | 40547371 | 40555440 | PSMG1      | - | loss |
| chr21 | 40557403 | 40685712 | BRWD1      | - | loss |
| chr21 | 40714240 | 40721047 | HMGN1      | - | loss |
| chr21 | 40777769 | 40817670 | LCA5L      | - | loss |
| chr21 | 40969074 | 40984749 | C21orf88   | - | loss |
| chr21 | 41384342 | 42219039 | DSCAM      | - | loss |
| chr21 | 41584278 | 41584358 | MIR4760    | - | loss |
| chr21 | 41990432 | 42002693 | DSCAM-IT1  | - | loss |
| chr21 | 42513426 | 42519991 | LINC00323  | - | loss |
| chr21 | 42547157 | 42557166 | PLAC4      | - | loss |
| chrY  | 14774297 | 14804153 | TTY15      | + | loss |
| chrY  | 14813159 | 14972768 | USP9Y      | + | loss |
| chrY  | 15016018 | 15032390 | DDX3Y      | + | loss |
| chrY  | 15815446 | 15817902 | TMSB4Y     | + | loss |
| chrY  | 16634487 | 16955848 | NLGN4Y     | + | loss |
| chrY  | 21729235 | 21769056 | TXLNGY     | + | loss |
| chrY  | 22737610 | 22755040 | EIF1AY     | + | loss |
| chrY  | 22917953 | 22942918 | RPS4Y2     | + | loss |
| chrY  | 24455005 | 24462352 | RBMY2FP    | + | loss |
| chrY  | 24455005 | 24564028 | RBMY1F     | + | loss |
| chrY  | 24636543 | 24660784 | PRY        | + | loss |
| chrY  | 25365580 | 27053187 | DAZ2       | + | loss |
| chrY  | 14517914 | 14533389 | GYG2P1     | - | loss |
| chrY  | 15346460 | 15592550 | UTY        | - | loss |
| chrY  | 16905521 | 16915913 | NLGN4Y-AS1 | - | loss |
| chrY  | 21094584 | 21239302 | TTY14      | - | loss |
| chrY  | 21152525 | 21154705 | CD24       | - | loss |
| chrY  | 21617316 | 21665039 | BCORP1     | - | loss |
| chrY  | 21867300 | 21906825 | KDM5D      | - | loss |
| chrY  | 22627553 | 22681114 | TTY10      | - | loss |
| chrY  | 23557033 | 23563448 | RBMY2EP    | - | loss |
| chrY  | 23745485 | 23756552 | TTY13      | - | loss |
| chrY  | 24026222 | 24329089 | RBMY1E     | - | loss |
| chrY  | 24217902 | 24242154 | PRY2       | - | loss |
| chrY  | 24442944 | 24445023 | TTY5       | - | loss |
| chrY  | 25275501 | 25345254 | DAZ1       | - | loss |

oSNP)

Supplementary Table 5. Top 100 genes with the most highly variable inter-tumour expression

| Gene ID  | Ensembl ID      | chromosome  |
|----------|-----------------|-------------|
| ABCC4    | ENSG00000125257 | chr13q32.1  |
| ACTC1    | ENSG00000159251 | chr15q14    |
| ADIRF    | ENSG00000148671 | chr10q23.2  |
| AEBP1    | ENSG00000106624 | chr7p13     |
| ALOX15B  | ENSG00000179593 | chr17p13.1  |
| AMACR    | ENSG00000242110 | chr5p13.2   |
| ANGPTL4  | ENSG00000167772 | chr19p13.2  |
| ANPEP    | ENSG00000166825 | chr15q26.1  |
| AOC1     | ENSG00000002726 | chr7q36.1   |
| ATF3     | ENSG00000162772 | chr1q32.3   |
| C11orf96 | ENSG00000187479 | chr11p11.2  |
| C15orf48 | ENSG00000166920 | chr15q21.1  |
| C1orf64  | ENSG00000183888 | chr1p36.13  |
| CCL2     | ENSG00000108691 | chr17q12    |
| CES1     | ENSG00000262243 | chr16q12.2  |
| CFB      | ENSG00000239754 | chr6p21.33  |
| CLDN1    | ENSG00000163347 | chr3q28     |
| CLDN8    | ENSG00000156284 | chr21q22.11 |
| CNTNAP2  | ENSG00000174469 | chr7q35     |
| COL1A1   | ENSG00000108821 | chr17q21.33 |
| COL6A2   | ENSG00000142173 | chr21q22.3  |
| COL8A1   | ENSG00000144810 | chr3q12.1   |
| COL9A2   | ENSG00000049089 | chr1p34.2   |
| COMP     | ENSG00000105664 | chr19p13.11 |
| CYP27A1  | ENSG00000135929 | chr2q35     |
| CYP2J2   | ENSG00000134716 | chr1p32.1   |
| CYR61    | ENSG00000142871 | chr1p22.3   |
| DLX1     | ENSG00000144355 | chr2q31.1   |
| DNASE2B  | ENSG00000137976 | chr1p31.1   |
| EEF1A2   | ENSG00000101210 | chr20q13.33 |
| EGR1     | ENSG00000120738 | chr5q31.2   |
| ERAP2    | ENSG00000164308 | chr5q15     |
| FAM3D    | ENSG00000198643 | chr3p14.2   |
| FBLN1    | ENSG00000077942 | chr22q13.31 |
| FOS      | ENSG00000170345 | chr14q24.3  |
| FOSB     | ENSG00000125740 | chr19q13.32 |
| GDF15    | ENSG00000130513 | chr19p13.11 |
| GNMT     | ENSG00000124713 | chr6p21.1   |
| GP2      | ENSG00000169347 | chr16p12.3  |
| GSTT1    | ENSG00000277656 | chr22q11.23 |
| H19      | ENSG00000130600 | chr11p15.5  |
| HMGCS2   | ENSG00000134240 | chr1p12     |
| HSD17B6  | ENSG00000025423 | chr12q13.3  |
| IGFBP6   | ENSG00000167779 | chr12q13.13 |
| IGJ      | ENSG00000132465 | chr4q13.3   |
| KCNN2    | ENSG00000080709 | chr5q22.3   |
| KCNN4    | ENSG00000104783 | chr19q13.31 |
| KLK12    | ENSG00000186474 | chr19q13.41 |

|          |                 |             |
|----------|-----------------|-------------|
| KRT15    | ENSG00000171346 | chr17q21.2  |
| LTBP4    | ENSG00000090006 | chr19q13.2  |
| MARCH6   | ENSG00000145495 | chr5p15.2   |
| MESP1    | ENSG00000166823 | chr15q26.1  |
| MIPEP    | ENSG00000027001 | chr13q12.12 |
| MME      | ENSG00000196549 | chr3q25.2   |
| MMP7     | ENSG00000137673 | chr11q22.2  |
| MS4A8    | ENSG00000166959 | chr11q12.2  |
| MSMB     | ENSG00000263639 | chr10q11.22 |
| MT1G     | ENSG00000125144 | chr16q13    |
| MT1M     | ENSG00000205364 | chr16q13    |
| MUC1     | ENSG00000185499 | chr1q22     |
| MYBPC1   | ENSG00000196091 | chr12q23.2  |
| NCAPD3   | ENSG00000151503 | chr11q25    |
| NFKBIZ   | ENSG00000144802 | chr3q12.3   |
| OLFM4    | ENSG00000102837 | chr13q14.3  |
| OR51E1   | ENSG00000180785 | chr11p15.4  |
| ORM2     | ENSG00000228278 | chr9q32     |
| PAGE4    | ENSG00000101951 | chrXp11.23  |
| PCA3     | ENSG00000225937 | chr9q21.2   |
| PCAT4    | ENSG00000251321 | chr4q21.21  |
| PCGEM1   | ENSG00000227418 | chr2q32.3   |
| PDE8B    | ENSG00000113231 | chr5q13.3   |
| PGC      | ENSG00000096088 | chr6p21.1   |
| PI16     | ENSG00000164530 | chr6p21.2   |
| PIGR     | ENSG00000162896 | chr1q32.1   |
| PLA2G2A  | ENSG00000188257 | chr1p36.13  |
| PLA2G7   | ENSG00000146070 | chr6p12.3   |
| PLAC9    | ENSG00000189129 | chr10q22.3  |
| PPAP2A   | ENSG00000067113 | chr5q11.2   |
| PTGS2    | ENSG00000073756 | chr1q31.1   |
| RLN1     | ENSG00000107018 | chr9p24.1   |
| RPL14    | ENSG00000188846 | chr3p22.1   |
| RPL17    | ENSG00000265681 | chr18q21.1  |
| S100P    | ENSG00000163993 | chr4p16.1   |
| SCIN     | ENSG00000006747 | chr7p21.3   |
| SCUBE2   | ENSG00000175356 | chr11p15.4  |
| SERPINA3 | ENSG00000196136 | chr14q32.13 |
| SNAP91   | ENSG00000065609 | chr6q14.2   |
| SORD     | ENSG00000140263 | chr15q21.1  |
| SPON2    | ENSG00000159674 | chr4p16.3   |
| STXBP6   | ENSG00000168952 | chr14q12    |
| TFF3     | ENSG00000160180 | chr21q22.3  |
| TMEFF2   | ENSG00000144339 | chr2q32.3   |
| TMEM178A | ENSG00000152154 | chr2p22.1   |
| TNFRSF19 | ENSG00000127863 | chr13q12.12 |
| TUBB2A   | ENSG00000137267 | chr6p25.2   |
| VSIG2    | ENSG00000019102 | chr11q24.2  |
| ZFP36    | ENSG00000128016 | chr19q13.2  |
| ZNF385B  | ENSG00000144331 | chr2q31.3   |

|         |                 |           |
|---------|-----------------|-----------|
| LEPREL1 | ENSG00000090530 | chr3q29   |
| PDIA3P  | ENSG00000180867 | chr1q21.1 |

Supplementary Table 6. Discriminating 100 gene set, derived from gene expression and copy number feature data\*

| Chromosome  | start position^ | end position | Associated gene | % CNAs in cohort |
|-------------|-----------------|--------------|-----------------|------------------|
| chr8p21.3   | 23119071        | 23119120     | CHMP7           | 37%              |
| chr8p21.3   | 23153663        | 23153712     | R3HCC1          | 37%              |
| chr8p21.3   | 22432879        | 22432928     | SORBS3          | 36%              |
| chr8p21.3   | 22477693        | 22477742     | CCAR2           | 36%              |
| chr8p21.3   | 22461341        | 22461390     | C8orf58         | 36%              |
| chr8p21.3   | 21961474        | 21961523     | FAM160B2        | 36%              |
| chr8p21.3   | 21939833        | 21939882     | DMTN            | 36%              |
| chr8p21.3   | 22398199        | 22398248     | PPP3CC          | 36%              |
| chr8p21.3   | 20078945        | 20078994     | ATP6V1B2        | 35%              |
| chr8p23.1   | 11185430        | 11185479     | MTMR9           | 35%              |
| chr8p23.1   | 8890610         | 8890659      | ERI1            | 34%              |
| chr8p21.2   | 27316655        | 27316704     | PTK2B           | 34%              |
| chr8p12     | 30436174        | 30436223     | GTF2E2          | 33%              |
| chr8p21.1   | 28048518        | 28048567     | ELP3            | 33%              |
| chr8p21.1   | 28625279        | 28625328     | INTS9           | 33%              |
| chr8p11.22  | 38846564        | 38846613     | TM2D2           | 25%              |
| chr8p11.21  | 41788540        | 41788589     | KAT6A           | 25%              |
| chr8p11.23  | 38020937        | 38020986     | LSM1            | 25%              |
| chr8p11.23  | 37701676        | 37701725     | BRF2            | 25%              |
| chr13q14.2  | 49063443        | 49063492     | RCBTB2          | 21%              |
| chr13q14.13 | 45858012        | 45858061     | GTF2F2          | 20%              |
| chr13q14.2  | 50065906        | 50065955     | SETDB2          | 20%              |
| chr13q14.2  | 50591839        | 50591888     | TRIM13          | 20%              |
| chr13q14.2  | 50102892        | 50102941     | PHF11           | 20%              |
| chr13q14.3  | 53262319        | 53262368     | SUGT1           | 19%              |
| chr13q14.11 | 42897015        | 42897064     | AKAP11          | 18%              |
| chr16q24.1  | 85840509        | 85840558     | COX4I1          | 16%              |
| chr16q24.2  | 87741499        | 87741548     | KLHDC4          | 16%              |
| chr6q15     | 88228353        | 88228402     | RARS2           | 15%              |
| chr16q24.3  | 89977633        | 89977682     | TCF25           | 15%              |
| chr16q24.3  | 88927406        | 88927455     | TRAPPC2L        | 15%              |
| chr16q24.3  | 90034280        | 90034329     | DEF8            | 15%              |
| chr16q23.3  | 83846402        | 83846451     | HSBP1           | 15%              |
| chr6q15     | 89320073        | 89320122     | RNGTT           | 14%              |
| chr6q15     | 91225641        | 91225690     | MAP3K7          | 13%              |
| chr8q21.3   | 90802376        | 90802425     | RIPK2           | 13%              |
| chr8q24.13  | 124232447       | 124232496    | C8orf76         | 13%              |
| chr8q24.13  | 126379143       | 126379192    | NSMCE2          | 13%              |
| chr6q21     | 110146366       | 110146415    | FIG4            | 12%              |
| chr8q11.21  | 48648011        | 48648060     | SPIDR           | 12%              |
| chr8q21.13  | 82570430        | 82570479     | IMPA1           | 12%              |
| chr8q21.3   | 87573314        | 87573363     | CPNE3           | 12%              |
| chr8q22.2   | 101533288       | 101533337    | ANKRD46         | 12%              |
| chr8q23.2   | 110576909       | 110576958    | EBAG9           | 12%              |
| chr8q21.13  | 80947140        | 80947189     | TPD52           | 12%              |
| chr8q21.13  | 82671480        | 82671529     | CHMP4C          | 12%              |
| chr8q22.1   | 97346438        | 97346487     | PTDSS1          | 12%              |
| chr8q24.3   | 146199160       | 146199209    | ZNF252P         | 11%              |



|             |           |           |             |     |
|-------------|-----------|-----------|-------------|-----|
| chr16q23.1  | 74907697  | 74907746  | WDR59       | 11% |
| chr17p13.1  | 7529756   | 7529805   | SAT2        | 9%  |
| chr17p13.1  | 7363017   | 7363066   | ZBTB4       | 9%  |
| chr17p13.1  | 7491180   | 7491229   | MPDU1       | 9%  |
| chr17p13.2  | 4862717   | 4862766   | SPAG7       | 9%  |
| chr17p13.2  | 4840686   | 4840735   | SLC25A11    | 9%  |
| chr10q23.1  | 85912689  | 85912738  | GHITM       | 8%  |
| chr18q23    | 77806076  | 77806125  | RBFA        | 8%  |
| chr18q23    | 77662567  | 77662616  | PQLC1       | 8%  |
| chr6q22.31  | 125597068 | 125597117 | HDDC2       | 7%  |
| chr12p13.31 | 6840857   | 6840906   | COPS7A      | 7%  |
| chr16q22.1  | 70286329  | 70286378  | AARS        | 7%  |
| chr16q22.1  | 70514063  | 70514112  | FUK         | 7%  |
| chr17p13.2  | 4060604   | 4060653   | CYB5D2      | 7%  |
| chr17p13.2  | 3564717   | 3564766   | CTNS        | 7%  |
| chr17p13.2  | 4067363   | 4067412   | ANKFY1      | 7%  |
| chr18q21.1  | 43846636  | 43846685  | C18orf25    | 7%  |
| chr17p12    | 12895998  | 12896047  | ELAC2       | 7%  |
| chr18q21.1  | 47808738  | 47808787  | CXXC1       | 6%  |
| chr18q21.33 | 59711985  | 59712034  | PIGN        | 6%  |
| chr7q32.1   | 127231472 | 127231521 | FSCN3       | 6%  |
| chr7q32.1   | 127231472 | 127231521 | ARF5        | 6%  |
| chr18q21.1  | 44633811  | 44633860  | HDHD2       | 6%  |
| chr17p12    | 14111849  | 14111898  | COX10       | 6%  |
| chr10q24.32 | 104183242 | 104183291 | CUEDC2      | 5%  |
| chr10q24.1  | 99218137  | 99218186  | MMS19       | 5%  |
| chr18p11.22 | 9537980   | 9538029   | RALBP1      | 5%  |
| chr18p11.21 | 12329202  | 12329251  | AFG3L2      | 5%  |
| chr2q14.3   | 128015187 | 128015236 | ERCC3       | 4%  |
| chr2q14.3   | 128461058 | 128461107 | SFT2D3      | 4%  |
| chr2q24.1   | 158593153 | 158593202 | ACVR1       | 4%  |
| chr3q27.1   | 184052784 | 184052833 | EIF4G1      | 4%  |
| chr3q27.1   | 183530057 | 183530106 | YEATS2      | 4%  |
| chr13q34    | 115038036 | 115038085 | CDC16       | 3%  |
| chr3q26.2   | 169557364 | 169557413 | LRRC31      | 3%  |
| chr1p21.2   | 101007343 | 101007392 | GPR88       | 2%  |
| chr3q22.1   | 131083043 | 131083092 | NUDT16P1    | 2%  |
| chr9q33.3   | 129647594 | 129647643 | ZBTB34      | 2%  |
| chr9q33.3   | 128321925 | 128321974 | MAPKAP1     | 2%  |
| chr3q22.1   | 129023910 | 129023959 | HMCES       | 2%  |
| chr3q22.1   | 128631728 | 128631777 | ACAD9       | 2%  |
| chr12q13.3  | 57924185  | 57924234  | DCTN2       | 2%  |
| chr20q13.33 | 61962106  | 61962155  | COL20A1     | 1%  |
| chr2p21     | 47747953  | 47748002  | KCNK12      | 1%  |
| chr9q22.33  | 101611248 | 101611297 | GALNT12     | 1%  |
| chr9q31.1   | 102648734 | 102648783 | RP11-60I3.5 | 1%  |
| chr9p13.2   | 36677336  | 36677385  | MELK        | 1%  |
| chr9q31.1   | 104087030 | 104087079 | LPPR1       | 1%  |
| chr12q12    | 46316836  | 46316885  | SCAF11      | 1%  |
| chr20q11.21 | 30422380  | 30422429  | MYLK2       | 1%  |

|            |          |          |           |    |
|------------|----------|----------|-----------|----|
| chr17q23.2 | 62016057 | 62016106 | SCN4A     | 1% |
| chr12q12   | 46119857 | 46119906 | LINC00938 | 1% |

^ mapped to hg19

\* Only OncoSNP (Yau et al., 2010) calls rank1+2 considered - see Methods.

Supplementary Table 7. Measures of cluster accuracy, compared to integrative clustering

|                                                | iCluster vs Gx<br>alone<br>(T variability) | iCluster vs Gx<br>(fold change) | iCluster vs CN<br>alone | Gx<br>(T variability)<br>vs<br>Gx (fold change) |
|------------------------------------------------|--------------------------------------------|---------------------------------|-------------------------|-------------------------------------------------|
| Adjusted Rand Index<br>(Hubert 1985)           | 0.13                                       | 0.08                            | 0.35                    | 0.47                                            |
| Variation of Information Index<br>(Meilă 2007) | 2.4                                        | 2.7                             | 1.7                     | 1.5                                             |

Gx = gene expression

CN = copy number

iCluster = integrative clustering, performed in iCluster+ (Mo et al., 2013).

T variability - tumour variability (see Gorlov et al. (2012) and Gorlov et al. (2014))



Supplementary Table 8. Summary of clinical characteristics of 2nd validation cohort (from Taylor et al., 2010).

|                                  | Primary tumour |     | Metastases |     |
|----------------------------------|----------------|-----|------------|-----|
|                                  | n = 181        | %   | n = 37     | %   |
| <b>Age (years)</b>               |                |     |            |     |
| Mean                             | 60.9           |     | 60         |     |
| Range                            | 37.3 - 83      |     | 41-82      |     |
| <b>Pre-operative PSA (ng/ml)</b> |                |     |            |     |
| < 4                              | 31             | 25% | 4          | 13% |
| 4 - 10                           | 105            | 84% | 6          | 19% |
| > 10                             | 44             | 35% | 22         | 69% |
| <b>Biopsy Gleason Grade</b>      |                |     |            |     |
| 5                                | 2              | 1%  | -          | -   |
| 6                                | 101            | 56% | 2          | 6%  |
| 7                                | 61             | 34% | 16         | 46% |
| 8                                | 11             | 6%  | 8          | 23% |
| 9                                | 6              | 3%  | 9          | 25% |
| <b>Clinical stage</b>            |                |     |            |     |
| cT1c                             | 95             | 52% | 8          | 22% |
| cT2c                             | 76             | 42% | 12         | 33% |
| cT3                              | 9              | 5%  | 3          | 8%  |
| pT4                              | -              | -   | 1          | 3%  |
| not available                    | -              | -   | 9          | 25% |
| <b>Ethnicity</b>                 |                |     |            |     |
| Black                            | 29             | 16% | 2          | 6%  |
| Asian                            | 4              | 2%  | -          | -   |
| White Hispanic                   | -              | 0%  | 2          | 6%  |
| White non-Hispanic               | 142            | 79% | 32         | 89% |
| unknown                          | 6              | 3%  | -          | -   |

\*Only samples with aCGH and mRNA were used in this analysis: 109 primary tumours and 19 metastases.

| Genes.SYMBOL | Coef.clust1 - Benign | t.clust1 - Benign | p.value.adj.clust1 - Benign | Genes.IlluminaID |
|--------------|----------------------|-------------------|-----------------------------|------------------|
| AMACR        | 2.598                | 11.51             | 0                           | ILMN_1759670     |
| HPN          | 2.191                | 14.38             | 0                           | ILMN_2358760     |
| HPN          | 2.175                | 14.13             | 0                           | ILMN_1687235     |
| PCA3         | 2.142                | 9.97              | 0                           | ILMN_3239648     |
| AGR2         | 2.053                | 8.15              | 0                           | ILMN_3307841     |
| PLA2G7       | 1.942                | 9.23              | 0                           | ILMN_1701195     |
| ABCC4        | 1.931                | 9.58              | 0                           | ILMN_2194009     |
| DLX1         | 1.832                | 12.24             | 0                           | ILMN_1672094     |
| TRPM4        | 1.781                | 10.06             | 0                           | ILMN_1679401     |
| SPON2        | 1.766                | 6.74              | 0                           | ILMN_1676099     |
| ABCC4        | 1.689                | 8.93              | 0                           | ILMN_1788457     |
| GDF15        | 1.591                | 5.29              | 4.00E-06                    | ILMN_2188862     |
| TSPAN13      | 1.554                | 11.12             | 0                           | ILMN_1669881     |
| THBS4        | 1.527                | 7.17              | 0                           | ILMN_1736078     |
| RAP1GAP      | 1.5                  | 11.04             | 0                           | ILMN_1776519     |
| LEPREL1      | -1.507               | -5.76             | 0                           | ILMN_1657373     |
| SMTN         | -1.524               | -8.75             | 0                           | ILMN_1785618     |
| TCEAL2       | -1.529               | -10.94            | 0                           | ILMN_1765310     |
| BNIP1        | -1.53                | -8.72             | 0                           | ILMN_1699989     |
| PARM1        | -1.532               | -11.61            | 0                           | ILMN_1656560     |
| ZNF827       | -1.548               | -9.72             | 0                           | ILMN_1727574     |
| SCGB3A1      | -1.55                | -7.79             | 0                           | ILMN_1679666     |
| PDK4         | -1.566               | -8.08             | 0                           | ILMN_1684982     |
| SLC2A5       | -1.611               | -8.46             | 0                           | ILMN_1671337     |
| PCP4         | -1.615               | -8.76             | 0                           | ILMN_1682326     |
| FOS          | -1.619               | -5.05             | 1.00E-05                    | ILMN_1669523     |
| KIAA1210     | -1.628               | -8.33             | 0                           | ILMN_1732962     |
| COL17A1      | -1.641               | -10.68            | 0                           | ILMN_1651282     |
| GCNT2        | -1.67                | -9.22             | 0                           | ILMN_1680390     |
| FLRT3        | -1.686               | -10.56            | 0                           | ILMN_1805665     |
| KIAA0353     | -1.697               | -10.38            | 0                           | ILMN_1712075     |
| ANPEP        | -1.736               | -4.98             | 1.30E-05                    | ILMN_1763837     |
| DES          | -1.741               | -9.68             | 0                           | ILMN_1698995     |
| WFDC2        | -1.817               | -10.51            | 0                           | ILMN_3307693     |
| OLFM4        | -1.875               | -3.96             | 0.000619                    | ILMN_2116877     |
| MSMB         | -1.884               | -5.87             | 0                           | ILMN_2376313     |
| MME          | -1.904               | -7.65             | 0                           | ILMN_1678170     |
| MSMB         | -1.917               | -6.13             | 0                           | ILMN_1790906     |
| PRDM8        | -2.037               | -9.68             | 0                           | ILMN_1802082     |
| KRT15        | -2.079               | -10.15            | 0                           | ILMN_1770612     |
| TP63         | -2.259               | -11.43            | 0                           | ILMN_3305055     |

| Genes.SYMBOL | Coef.clust2 - Benign | t.clust2 - Benign | p.value.adj.clust2 - Benign | Genes.IlluminaID |
|--------------|----------------------|-------------------|-----------------------------|------------------|
| HPN          | 1.637                | 10.98             |                             | 0 ILMN_1687235   |
| PCA3         | 1.567                | 7.53              |                             | 0 ILMN_3239648   |
| HPN          | 1.556                | 10.54             |                             | 0 ILMN_2358760   |

| Genes.SYMBOL | Coef.clust3 - Benign | t.clust3 - Benign | p.value.adj.clust3 - Benign | Genes.IlluminaID |
|--------------|----------------------|-------------------|-----------------------------|------------------|
| KLK12        | 3.189                | 9.89              | 0                           | ILMN_1725912     |
| AMACR        | 2.879                | 8.63              | 0                           | ILMN_1759670     |
| SPON2        | 2.642                | 6.82              | 0                           | ILMN_1676099     |
| FGFRL1       | 2.267                | 13.52             | 0                           | ILMN_1795865     |
| TRPM4        | 2.221                | 8.49              | 0                           | ILMN_1679401     |
| HPN          | 2.115                | 9.3               | 0                           | ILMN_1687235     |
| CYP2J2       | 2.113                | 7.26              | 0                           | ILMN_1758731     |
| GDF15        | 2.11                 | 4.75              | 6.40E-05                    | ILMN_2188862     |
| UNC5A        | 2.107                | 7.84              | 0                           | ILMN_1712913     |
| HPN          | 2.033                | 9.03              | 0                           | ILMN_2358760     |
| DLX1         | 2.016                | 9.11              | 0                           | ILMN_1672094     |
| MYL2         | 2.009                | 3.92              | 0.001179                    | ILMN_2113807     |
| PCA3         | 1.918                | 6.04              | 0                           | ILMN_3239648     |
| MS4A8        | 1.913                | 7.28              | 0                           | ILMN_1808249     |
| TRIB1        | 1.885                | 6.49              | 0                           | ILMN_1803811     |
| MYL1         | 1.879                | 4.25              | 0.000392                    | ILMN_1700860     |
| MYH7         | 1.833                | 3.91              | 0.001212                    | ILMN_1669714     |
| KLK12        | 1.816                | 8.93              | 0                           | ILMN_2411511     |
| TMSB15A      | 1.794                | 5.31              | 7.00E-06                    | ILMN_1681737     |
| TFF3         | 1.718                | 2.97              | 0.018336                    | ILMN_1811387     |
| TSPAN13      | 1.717                | 8.31              | 0                           | ILMN_1669881     |
| CLDN8        | 1.717                | 6.21              | 0                           | ILMN_2072568     |
| C15orf48     | 1.684                | 3.19              | 0.010379                    | ILMN_1805410     |
| MB           | 1.664                | 4.96              | 2.90E-05                    | ILMN_1666109     |
| HOXC4        | 1.657                | 7.89              | 0                           | ILMN_1719975     |
| RAB17        | 1.65                 | 8.56              | 0                           | ILMN_2052373     |
| ELF5         | 1.614                | 8.42              | 0                           | ILMN_1813270     |
| ABCC4        | 1.59                 | 5.69              | 1.00E-06                    | ILMN_1788457     |
| ABCC4        | 1.569                | 5.27              | 8.00E-06                    | ILMN_2194009     |
| FLJ22184     | 1.554                | 8                 | 0                           | ILMN_2387471     |
| TSPAN13      | 1.534                | 8.25              | 0                           | ILMN_2130525     |
| GNMT         | 1.53                 | 4.03              | 0.000811                    | ILMN_1736238     |
| CLDN8        | 1.525                | 6.53              | 0                           | ILMN_1746676     |
| SLN          | 1.503                | 3.67              | 0.002579                    | ILMN_1778595     |
| JAM3         | -1.51                | -7.46             | 0                           | ILMN_1769575     |
| EDNRA        | -1.513               | -7.99             | 0                           | ILMN_1796629     |
| LIMS2        | -1.515               | -8.06             | 0                           | ILMN_1760493     |
| KRT13        | -1.516               | -3.11             | 0.012789                    | ILMN_1721218     |
| ITGA5        | -1.522               | -5.53             | 3.00E-06                    | ILMN_1792679     |
| MSRB3        | -1.525               | -8.08             | 0                           | ILMN_1676088     |
| DPYSL3       | -1.528               | -8.35             | 0                           | ILMN_1679262     |
| RARRES1      | -1.528               | -4.76             | 6.00E-05                    | ILMN_1800091     |
| TGM4         | -1.531               | -2.66             | 0.038728                    | ILMN_1669363     |
| CALD1        | -1.531               | -8.51             | 0                           | ILMN_1730487     |
| HSPB8        | -1.532               | -6.91             | 0                           | ILMN_1791280     |
| SLC14A1      | -1.54                | -8.21             | 0                           | ILMN_1805561     |
| ALDH1A2      | -1.541               | -8.03             | 0                           | ILMN_1748538     |
| PTGS2        | -1.55                | -4.58             | 0.000119                    | ILMN_2054297     |
| HSPB6        | -1.553               | -5.85             | 1.00E-06                    | ILMN_1721283     |
| TNFRSF19     | -1.556               | -4.92             | 3.40E-05                    | ILMN_1704154     |



|          |        |        |          |              |
|----------|--------|--------|----------|--------------|
| ID1      | -1.559 | -5.24  | 9.00E-06 | ILMN_1664861 |
| CFB      | -1.56  | -3.26  | 0.00843  | ILMN_1774287 |
| SCGB3A1  | -1.565 | -5.32  | 7.00E-06 | ILMN_1679666 |
| LAMB3    | -1.57  | -8.11  | 0        | ILMN_1715684 |
| CCND2    | -1.577 | -7.02  | 0        | ILMN_2067656 |
| DLK2     | -1.577 | -7.88  | 0        | ILMN_1676728 |
| CPED1    | -1.577 | -8.66  | 0        | ILMN_1677038 |
| ANXA1    | -1.58  | -6.84  | 0        | ILMN_2184184 |
| C2orf40  | -1.587 | -5.28  | 8.00E-06 | ILMN_1676822 |
| PAGE4    | -1.588 | -4.88  | 3.90E-05 | ILMN_1782754 |
| AHNAK2   | -1.589 | -7.75  | 0        | ILMN_3243156 |
| ROR2     | -1.594 | -10.63 | 0        | ILMN_1694426 |
| ATP2B4   | -1.595 | -9.19  | 0        | ILMN_1680579 |
| PDE8B    | -1.602 | -6.17  | 0        | ILMN_2301722 |
| TGFB111  | -1.625 | -7.83  | 0        | ILMN_2389876 |
| MYH11    | -1.641 | -10.54 | 0        | ILMN_1660086 |
| LGALS1   | -1.671 | -9.33  | 0        | ILMN_1723978 |
| STOM     | -1.676 | -9.43  | 0        | ILMN_1766657 |
| TPM1     | -1.679 | -7.33  | 0        | ILMN_2360710 |
| CLIP3    | -1.683 | -7.12  | 0        | ILMN_1789733 |
| TP63     | -1.683 | -9.34  | 0        | ILMN_2138801 |
| ISL1     | -1.687 | -8.34  | 0        | ILMN_1763390 |
| BNIPL    | -1.689 | -6.51  | 0        | ILMN_1699989 |
| TPM1     | -1.694 | -7.37  | 0        | ILMN_1716687 |
| GPR124   | -1.696 | -8.19  | 0        | ILMN_1773059 |
| CCK      | -1.707 | -5.62  | 2.00E-06 | ILMN_1712943 |
| KRT5     | -1.707 | -7.45  | 0        | ILMN_1801632 |
| FLNA     | -1.709 | -6.57  | 0        | ILMN_1687335 |
| AHNAK2   | -1.714 | -7.72  | 0        | ILMN_1657111 |
| C12orf75 | -1.735 | -8.36  | 0        | ILMN_1716382 |
| PTRF     | -1.746 | -9.01  | 0        | ILMN_1757552 |
| TMEM158  | -1.759 | -6.33  | 0        | ILMN_1792455 |
| FLNC     | -1.769 | -6.11  | 0        | ILMN_1715748 |
| CFD      | -1.771 | -5.19  | 1.10E-05 | ILMN_1777190 |
| SORBS1   | -1.78  | -7.52  | 0        | ILMN_1749792 |
| ATP2B4   | -1.799 | -9.21  | 0        | ILMN_2367753 |
| SLC2A5   | -1.801 | -6.4   | 0        | ILMN_1671337 |
| GPX3     | -1.809 | -8.07  | 0        | ILMN_1726666 |
| FBLN1    | -1.814 | -6.14  | 0        | ILMN_1700541 |
| VSIG2    | -1.82  | -4.94  | 3.10E-05 | ILMN_1666536 |
| KCNAB1   | -1.824 | -6.4   | 0        | ILMN_1744968 |
| LDHB     | -1.827 | -8.48  | 0        | ILMN_1728132 |
| MEIS2    | -1.836 | -9.99  | 0        | ILMN_1695945 |
| COL17A1  | -1.84  | -8.11  | 0        | ILMN_1651282 |
| ADIRF    | -1.842 | -6.55  | 0        | ILMN_1680110 |
| PDK4     | -1.864 | -6.51  | 0        | ILMN_1684982 |
| CES1     | -1.9   | -6.8   | 0        | ILMN_2359945 |
| AOC1     | -1.907 | -4.57  | 0.000123 | ILMN_1731433 |
| TCEAL2   | -1.938 | -9.38  | 0        | ILMN_1765310 |
| KCNMB1   | -1.944 | -8.8   | 0        | ILMN_1652065 |

|          |        |        |                       |
|----------|--------|--------|-----------------------|
| CALD1    | -2.014 | -6.65  | 0 ILMN_1717990        |
| CSRP1    | -2.06  | -10.58 | 0 ILMN_1811921        |
| CAV1     | -2.061 | -10.35 | 0 ILMN_2149226        |
| MYL9     | -2.111 | -9.1   | 0 ILMN_1675062        |
| MYLK     | -2.125 | -8.92  | 0 ILMN_2364768        |
| PNCK     | -2.129 | -9.57  | 0 ILMN_1697189        |
| TAGLN    | -2.13  | -9.2   | 0 ILMN_2400935        |
| FLRT3    | -2.184 | -9.26  | 0 ILMN_1805665        |
| DES      | -2.208 | -8.31  | 0 ILMN_1698995        |
| SMTN     | -2.212 | -8.59  | 0 ILMN_1785618        |
| CNN1     | -2.216 | -9.2   | 0 ILMN_1810054        |
| KIAA1210 | -2.232 | -7.73  | 0 ILMN_1732962        |
| PGM5     | -2.297 | -9.52  | 0 ILMN_1709590        |
| PGM5     | -2.311 | -9.7   | 0 ILMN_1781388        |
| PGM5     | -2.396 | -9.33  | 0 ILMN_2271149        |
| PRDM8    | -2.403 | -7.73  | 0 ILMN_1802082        |
| KRT15    | -2.48  | -8.19  | 0 ILMN_1770612        |
| TP63     | -2.554 | -8.75  | 0 ILMN_3305055        |
| WFDC2    | -2.555 | -10    | 0 ILMN_3307693        |
| OLFM4    | -2.566 | -3.67  | 0.002634 ILMN_2116877 |
| MSMB     | -2.578 | -6.71  | 0 ILMN_1699243        |
| MYLK     | -2.634 | -9.52  | 0 ILMN_1691476        |
| PCP4     | -2.649 | -9.73  | 0 ILMN_1682326        |
| SYNM     | -2.65  | -10.97 | 0 ILMN_1712075        |
| MSMB     | -3.216 | -6.78  | 0 ILMN_2376313        |
| MSMB     | -3.226 | -6.98  | 0 ILMN_1790906        |

| Genes.SYMBOL | Coef.clust4 - Benign | t.clust4 - Benign | p.value.adj.clust4 - Benign | Genes.IlluminaID |
|--------------|----------------------|-------------------|-----------------------------|------------------|
| TRPM4        | 2.136                | 11.2              |                             | 0 ILMN_1679401   |
| TFF3         | 1.892                | 4.49              | 0.000126                    | ILMN_1811387     |
| HPN          | 1.765                | 10.65             |                             | 0 ILMN_1687235   |
| FLJ22184     | 1.712                | 12.09             |                             | 0 ILMN_2387471   |
| HPN          | 1.688                | 10.29             |                             | 0 ILMN_2358760   |
| C1orf64      | 1.63                 | 5.02              | 1.60E-05                    | ILMN_2066088     |
| GDF15        | 1.506                | 4.65              | 6.90E-05                    | ILMN_2188862     |
| PRDM8        | -1.51                | -6.66             |                             | 0 ILMN_1802082   |
| MSMB         | -1.548               | -5.53             | 2.00E-06                    | ILMN_1699243     |
| MSMB         | -1.674               | -4.97             | 2.00E-05                    | ILMN_1790906     |
| TP63         | -1.698               | -7.98             |                             | 0 ILMN_3305055   |
| OLFM4        | -1.742               | -3.42             | 0.004484                    | ILMN_2116877     |
| MSMB         | -1.748               | -5.05             | 1.50E-05                    | ILMN_2376313     |

| Genes.SYMBOL | Coef.clust5 - Benign | t.clust5 - Benign | p.value.adj.clust5 - Benign | Genes.IlluminaID |
|--------------|----------------------|-------------------|-----------------------------|------------------|
| AMACR        | 2.596                | 12.68             |                             | 0 ILMN_1759670   |
| HPN          | 2.131                | 15.27             |                             | 0 ILMN_1687235   |
| HPN          | 2.106                | 15.25             |                             | 0 ILMN_2358760   |
| PCA3         | 2.081                | 10.68             |                             | 0 ILMN_3239648   |
| ABCC4        | 1.924                | 10.52             |                             | 0 ILMN_2194009   |
| TRPM4        | 1.907                | 11.88             |                             | 0 ILMN_1679401   |
| AGR2         | 1.889                | 8.27              |                             | 0 ILMN_3307841   |
| C1orf64      | 1.749                | 6.4               |                             | 0 ILMN_2066088   |
| THBS4        | 1.74                 | 9                 |                             | 0 ILMN_1736078   |
| GDF15        | 1.642                | 6.02              |                             | 0 ILMN_2188862   |
| COMP         | 1.596                | 5.66              | 1.00E-06                    | ILMN_1677636     |
| FLJ22184     | 1.513                | 12.69             |                             | 0 ILMN_2387471   |
| RAB17        | 1.508                | 12.74             |                             | 0 ILMN_2052373   |
| COL9A2       | 1.507                | 8.05              |                             | 0 ILMN_1685122   |
| SLC2A5       | -1.504               | -8.71             |                             | 0 ILMN_1671337   |
| PDK4         | -1.506               | -8.57             |                             | 0 ILMN_1684982   |
| MSMB         | -1.526               | -5.38             | 3.00E-06                    | ILMN_1790906     |
| DES          | -1.555               | -9.54             |                             | 0 ILMN_1698995   |
| PRDM8        | -1.665               | -8.73             |                             | 0 ILMN_1802082   |
| MME          | -1.688               | -7.48             |                             | 0 ILMN_1678170   |
| KRT15        | -1.837               | -9.88             |                             | 0 ILMN_1770612   |
| TP63         | -1.849               | -10.31            |                             | 0 ILMN_3305055   |

Supplementary Table 10. Refined gene signature for each patient subtype

| iCluster1 | iCluster2 | iCluster3   | iCluster4 | iCluster5 |
|-----------|-----------|-------------|-----------|-----------|
| ATP6V1B2  | AKAP11    | AKAP11      | ACVR1     | AFG3L2    |
| BRF2      | ANKRD46   | ANKRD46     | ANKRD46   | ANKRD46   |
| C8orf58   | ATP6V1B2  | ARF5        | C8orf76   | ATP6V1B2  |
| CCAR2     | C18orf25  | ATP6V1B2    | CCAR2     | BRF2      |
| CHMP7     | C8orf58   | C8orf58     | CHMP4C    | C18orf25  |
| COPS7A    | CCAR2     | C8orf76     | CHMP7     | C8orf58   |
| CTNS      | CDC16     | CCAR2       | COX10     | CCAR2     |
| CXXC1     | CHMP4C    | CHMP4C      | COX4I1    | CHMP7     |
| DMTN      | CHMP7     | COL20A1     | CPNE3     | CUEDC2    |
| ELP3      | CUEDC2    | COX4I1      | CTNS      | CXXC1     |
| ERI1      | DCTN2     | CPNE3       | CXXC1     | DMTN      |
| FAM160    | DMTN      | DMTN        | CYB5D2    | EBAG9     |
| FAM160B2  | ELP3      | EBAG9       | DEF8      | ELAC2     |
| GHITM     | ERI1      | ELAC2       | DMTN      | ELP3      |
| GTF2E2    | FAM160B2  | ELP3        | EBAG9     | ERI1      |
| INTS9     | GHITM     | ERI1        | ELAC2     | FAM160B2  |
| KAT6A     | GTF2E2    | FSCN3       | ELP3      | FIG4      |
| KLHDC4    | GTF2F2    | GTF2E2      | ERCC3     | GPR88     |
| LSM1      | HDDC2     | HSBP1       | FAM160B2  | GTF2E2    |
| MAPKAP1   | HDHD2     | IMPA1       | FUK       | HDHD2     |
| MTMR9     | HSBP1     | INTS9       | GHITM     | INTS9     |
| NUDT16P1  | INTS9     | MAPKAP1     | GTF2F2    | KAT6A     |
| PPP3CC    | KCNK12    | NSMCE2      | IMPA1     | LINC00938 |
| PQLC1     | LSM1      | PPP3CC      | INTS9     | LSM1      |
| PTK2B     | MAP3K7    | PTDSS1      | KAT6A     | MAP3K7    |
| R3HCC1    | MAPKAP1   | PTK2B       | KLHDC4    | MAPKAP1   |
| SAT2      | MTMR9     | R3HCC1      | MAPKAP1   | MELK      |
| SCAF11    | PHF11     | RIPK2       | MELK      | MMS19     |
| SORBS3    | PIGN      | RP11-60I3.5 | MMS19     | MTMR9     |
| TM2D2     | PPP3CC    | SORBS3      | MPDU1     | PPP3CC    |
| TPD52     | PTDSS1    | SPIDR       | MTMR9     | PTDSS1    |
| ZBTB4     | PTK2B     | TCF25       | NSMCE2    | PTK2B     |
|           | R3HCC1    | TPD52       | NUDT16P1  | R3HCC1    |
|           | RARS2     | ZBTB34      | PIGN      | RALBP1    |
|           | RCBTB2    | ZBTB4       | PQLC1     | RARS2     |
|           | RNGTT     | ZNF252P     | PTK2B     | RNGTT     |
|           | SETDB2    |             | R3HCC1    | SCAF11    |
|           | SORBS3    |             | RBFA      | SCN4A     |
|           | SPAG7     |             | RCBTB2    | SETDB2    |
|           | SUGT1     |             | RIPK2     | SLC25A11  |
|           | TM2D2     |             | SAT2      | SORBS3    |
|           | TRIM13    |             | SCAF11    | TM2D2     |
|           | WDR59     |             | SFT2D3    | TPD52     |
|           | ZBTB4     |             | SLC25A11  | ZBTB34    |
|           |           |             | SORBS3    |           |
|           |           |             | TCF25     |           |
|           |           |             | TRAPPC2L  |           |
|           |           |             | TRIM13    |           |
|           |           |             | YEATS2    |           |
|           |           |             | ZBTB4     |           |

Supplementary Table 11. Published molecular signatures of primary prostate cancer

| Study                             | Signature type | # genes | genes/pathways identified                                                                                                                                              |
|-----------------------------------|----------------|---------|------------------------------------------------------------------------------------------------------------------------------------------------------------------------|
| Cuzick et al. (2011)              | RNA            | 31      | cell cycle proliferation                                                                                                                                               |
| Irshad et al. (2013)              | RNA            | 19      | B2M, CAT, CDKN1A, CFH, CLIC4, CLU, CTSH, CXCL1, FGFR1, GPX3, IGF1, ITM2A, LGALS3, MECP2, MSN, NFE2L2, PMP22, SERPING1, TXNIP                                           |
| Sharma et al. (2013)              | DNA            | 16      | PECI, TNFSF10, ABHD2, XRCC3, MAD1L1, SEC61A1, GFM1, TSPAN13, STIL, EIF2B5, TM42F1, NDUFB11, SLC26A2, AGR2, NT5DC3, TRMT12                                              |
| Ramos-Montoya et al. (2014)       | RNA            | 222     | E2F1-mediated cell cycle                                                                                                                                               |
| Lalonde et al. (2014)             | DNA            | 100     | lipid metabolism genes enriched                                                                                                                                        |
| Oncotype Dx prostate cancer assay | RNA            | 17      | Genomic Prostate Score (GPS) given by expression levels of BGN, COL1A1, SFRP4, TX2, AZGP1, FAM13C, KLK2, SRD5A2, FLNC, GSN, GSTM2, TPM2, ARF1, ATP5E, CLTC, GPS1, PGK1 |

Supplementary Table 12. Comparison of prognostic power between our 100-gene signature and published PC signatures, based on p-value.

|                                               | Performance in Stockholm<br>(all features) | Performance in Taylor et al. (2010)<br>(gene expression) |
|-----------------------------------------------|--------------------------------------------|----------------------------------------------------------|
| Cambridge-derived<br>novel 100-gene signature | <b>8.96E-06</b>                            | <b>0.0213</b>                                            |
| Sharma et al. (2013)                          | 0.1086                                     | 0.0076                                                   |
| Cuzick et al. (2011)                          | 0.7471                                     | 0.4076                                                   |
| Irshad et al. (2014)                          | 0.7146                                     | 0.7727                                                   |
| HES6/Ramos-Montoya et al. (2014)              | 0.0260                                     | 0.1384                                                   |
| Lalonde et al (2014)*                         | 0.0891                                     | 0.7691                                                   |
| OncotypeDX                                    | 0.7766                                     | 0.3798                                                   |

\* Only copy number data available
